# Supplementary material for: Copper-catalyzed C–H/N–H annulation of enaminones and alkynyl esters for densely substituted pyrrole synthesis
Source: Royal Society of Chemistry journal article supplement (doi:10.1039/d1cc06768k), 2022-01-01
Supplement: d1cc06768k1.pdf [file d1cc06768k1.pdf]

# Copper-catalyzed C-H/N-H annulation of enamines and alkynyl esters for the construction of densely substituted Pyrroles

Leiqing Fu,<sup>a,b</sup> Jie-Ping Wan,<sup>a</sup> Liyun Zhou,<sup>a</sup> Yunyun Liu<sup>a,\*</sup>

<sup>a</sup>College of Chemistry and Chemical Engineering, Jiangxi Normal University, Nanchang 330022, P. R. China

<sup>b</sup>College of Chemistry and Bio-Engineering, Yichun University, Yichun, Jiangxi 336000, P. R. China

**Email:** chemliuyunyun@jxnu.edu.cn

## Contents

|                                                                            |        |
|----------------------------------------------------------------------------|--------|
| General experimental information.....                                      | S1     |
| Optimization of reaction conditions (Table S1).....                        | S2     |
| Figure S1: XPS analysis showing the presence of Cu(0) in the reaction..... | S3     |
| General procedure for the synthesis of <b>3</b> .....                      | S3     |
| Procdure for the 1 mmol scale synthesis of <b>3a</b> .....                 | S3-S4  |
| General procedure for the synthesis of <b>5</b> .....                      | S4     |
| Characterization data for all products.....                                | S4-S17 |
| References.....                                                            | S17    |
| The <sup>1</sup> H and <sup>13</sup> C NMR spectra of all products.....    | S18-53 |

## General experimental information

All experiments were carried out under air atmosphere. All enamines **1** were synthesized following literature process,<sup>1</sup> and other chemicals and solvents used in the experiments were obtained from commercial sources and used directly without further treatment. <sup>1</sup>H and <sup>13</sup>C NMR spectra were recorded in 400 MHz apparatus and the frequencies for <sup>1</sup>H NMR and <sup>13</sup>C NMR test are 400 MHz and 100 MHz, respectively. The chemical shifts were reported in ppm with TMS as internal standard. Melting points were tested in X-4A instrument without correcting temperature and the HRMS were obtained under ESI model with TOF analyzer.

**Table S1** Optimization of the reaction conditions<sup>a</sup>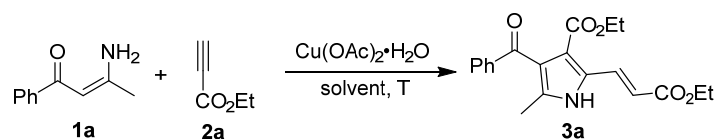

| Entry               | Catalyst (equiv)                       | Additive (equiv) | T (°C) | Solvent  | Yield <sup>b</sup> (%) |
|---------------------|----------------------------------------|------------------|--------|----------|------------------------|
| 1                   | Cu(OAc) <sub>2</sub>                   | -                | 80     | MeCN     | 36                     |
| 2                   | CuBr                                   | -                | 80     | MeCN     | no                     |
| 3                   | Cu(OTf) <sub>2</sub>                   | -                | 80     | MeCN     | trace                  |
| 4                   | Cu(NO <sub>3</sub> ) <sub>2</sub>      | -                | 80     | MeCN     | no                     |
| 5                   | -                                      | -                | 80     | MeCN     | no                     |
| 6                   | Cu(OTf) <sub>2</sub> ·H <sub>2</sub> O | -                | 80     | MeCN     | no                     |
| 7                   | Cu(OAc) <sub>2</sub> ·H <sub>2</sub> O | NaOAc (1.0)      | 80     | MeCN     | 32                     |
| 8                   | Cu(OAc) <sub>2</sub> ·H <sub>2</sub> O | NaOH (1.0)       | 80     | MeCN     | trace                  |
| 9                   | Cu(OAc) <sub>2</sub> ·H <sub>2</sub> O | HOAc (1.0)       | 80     | MeCN     | 34                     |
| 10                  | Cu(OAc) <sub>2</sub> ·H <sub>2</sub> O | -                | 80     | DMSO     | no                     |
| 11                  | Cu(OAc) <sub>2</sub> ·H <sub>2</sub> O | -                | 80     | DMF      | no                     |
| 12                  | Cu(OAc) <sub>2</sub> ·H <sub>2</sub> O | -                | 80     | DCE      | 25                     |
| 13                  | Cu(OAc) <sub>2</sub> ·H <sub>2</sub> O | -                | 80     | toluene  | no                     |
| 14 <sup>c</sup>     | Cu(OAc) <sub>2</sub> ·H <sub>2</sub> O | -                | 80     | MeCN/DCE | 42                     |
| 15 <sup>d</sup>     | Cu(OAc) <sub>2</sub> ·H <sub>2</sub> O | -                | 80     | MeCN/DCE | 47                     |
| 16 <sup>e</sup>     | Cu(OAc) <sub>2</sub> ·H <sub>2</sub> O | -                | 80     | MeCN/DCE | 40                     |
| 17 <sup>d,f</sup>   | Cu(OAc) <sub>2</sub> ·H <sub>2</sub> O | -                | 80     | MeCN/DCE | trace                  |
| 18 <sup>d,g</sup>   | Cu(OAc) <sub>2</sub> ·H <sub>2</sub> O | -                | 80     | MeCN/DCE | 43                     |
| 19 <sup>d,h</sup>   | Cu(OAc) <sub>2</sub> ·H <sub>2</sub> O | -                | 80     | MeCN/DCE | 42                     |
| 20 <sup>d,i</sup>   | Cu(OAc) <sub>2</sub> ·H <sub>2</sub> O | -                | 80     | MeCN/DCE | 51                     |
| 21 <sup>d,j</sup>   | Cu(OAc) <sub>2</sub> ·H <sub>2</sub> O | -                | 80     | MeCN/DCE | 62                     |
| 22 <sup>d,k</sup>   | Cu(OAc) <sub>2</sub> ·H <sub>2</sub> O | -                | 80     | MeCN/DCE | 60                     |
| 23 <sup>d,j</sup>   | Cu(OAc) <sub>2</sub> ·H <sub>2</sub> O | -                | 60     | MeCN/DCE | 53                     |
| 24 <sup>d,j,l</sup> | Cu(OAc) <sub>2</sub> ·H <sub>2</sub> O | -                | 100    | MeCN/DCE | 68                     |
| 25 <sup>d,j,l</sup> | Cu(OAc) <sub>2</sub> ·H <sub>2</sub> O | -                | 120    | MeCN/DCE | 41                     |
| 26 <sup>d,j,m</sup> | Cu(OAc) <sub>2</sub> ·H <sub>2</sub> O | -                | 100    | MeCN/DCE | trace                  |
| 27 <sup>d,j,n</sup> | Cu(OAc) <sub>2</sub> ·H <sub>2</sub> O | -                | 100    | MeCN/DCE | 64                     |

<sup>a</sup>Reaction conditions: **1a** (0.2 mmol), **2a** (0.5 mmol), and copper catalyst (0.5 equiv) in 2.0 mL solvent, stirred under air for 12 h. <sup>b</sup>Isolated yield. <sup>c</sup>With 1.5 mL and 0.5 mL DCE. <sup>d</sup>With 1.0 mL and 1.0 mL DCE. <sup>e</sup>With 0.5 mL and 1.5 mL DCE. <sup>f</sup>With 0.25 equiv Cu(OAc)<sub>2</sub>·H<sub>2</sub>O. <sup>g</sup>With 0.75 equiv Cu(OAc)<sub>2</sub>·H<sub>2</sub>O. <sup>h</sup>With **2a** (0.4 mmol). <sup>i</sup>With **2a** (0.6 mmol). <sup>j</sup>With **2a** (0.8 mmol). <sup>k</sup>With **2a** (0.9 mmol). <sup>l</sup>Reaction in sealed tube. <sup>m</sup>Reaction under nitrogen atmosphere. <sup>n</sup>Reaction under oxygen (1 atm).

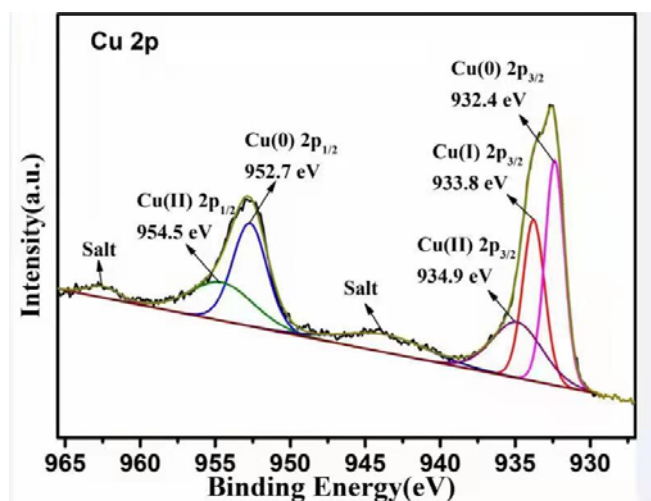

**Figure S1** XPS analysis on the reaction residue after washing with EtOAc

### General procedure for the synthesis of **3**

To a 10 mL sealed tube were added enaminone **1** (0.2 mmol), alkyl propiolate **2** (0.8 mmol), Cu(OAc)<sub>2</sub>·H<sub>2</sub>O (0.1 mmol), MeCN (1.0 mL) and DCE (1.0 mL). Then, the mixture was stirred at 100 °C in an oil bath for 12 h. Upon completion, the vessel was allowed to cool down to room temperature. After adding 5 mL saturated brine, the resulting mixture was extracted with ethyl acetate (3 × 8 mL). The organic phases were combined and washed with small amount of water for three times. After drying with anhydrous Na<sub>2</sub>SO<sub>4</sub>, the solid was filtered and the solvent in the acquired solution was removed under reduced pressure. The resulting residue was subjected to flash silica gel column chromatography to provide pure products with the elution of mixed petroleum ether/ethyl acetate (v/v = 10:1-3:1).

### Procedure for the 1 mmol scale synthesis of **3a**

To a 100 mL sealed tube were added enaminone **1a** (1 mmol, 161.1 mg), ethyl propiolate **2a** (4 mmol, 392.5 mg), Cu(OAc)<sub>2</sub>·H<sub>2</sub>O (0.5 mmol, 99.8 mg), MeCN (5.0 mL) and DCE (5.0 mL). Then, the mixture was stirred at 100 °C in an oil bath for 12 h. Upon completion, the vessel was allowed to cool down to room temperature. After adding 15 mL saturated brine, the resulting mixture was extracted with ethyl acetate (3 × 15 mL). The organic phases were combined and washed with small amount of water for three times. After drying with anhydrous Na<sub>2</sub>SO<sub>4</sub>, the solid was filtered and

the solvent in the acquired solution was removed under reduced pressure. The resulting residue was subjected to flash silica gel column chromatography to provide pure products **3a** (110.1 mg, 31%) with the elution of mixed petroleum ether/ethyl acetate ( $v/v = 5:1$ ).

### General procedure for the synthesis of **5**

To a 25 mL round-bottom flask were added enaminone **1** (0.2 mmol), dialkyl acetylenedicarboxylate **4** (0.3 mmol),  $\text{Cu}(\text{OAc})_2 \cdot \text{H}_2\text{O}$  (0.04 mmol), and EtOH (2.0 mL). The mixture was then stirred at room temperature for 6 h. Upon completion, the mixture was directly employed to reduced pressure to remove the solvent, and the resulting residue was purified by flash column chromatography to give pure product by using mixed petroleum ether/ethyl acetate ( $v/v = 8:1-3:1$ ).

### Characterization data of all products

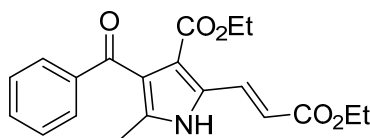

**Ethyl (E)-4-benzoyl-2-(3-ethoxy-3-oxoprop-1-en-1-yl)-5-methyl-1H-pyrrole-3-carboxylate (3a)**. Eluent:  $V_{\text{PET}}/V_{\text{EA}} = 5:1$ ; white solid (48.3 mg, 68% yield); mp 133-135°C;  $^1\text{H}$  NMR (400 MHz,  $\text{CDCl}_3$ )  $\delta$  10.18 (s, 1 H), 8.18 (d,  $J = 16.2$  Hz, 1 H), 7.81 (d,  $J = 7.8$  Hz, 2 H), 7.52 (t,  $J = 7.2$  Hz, 1 H), 7.42 (t,  $J = 7.0$  Hz, 2 H), 6.40 (d,  $J = 16.4$  Hz, 1 H), 4.29 (q,  $J = 6.2$ , 2 H), 3.80 (q,  $J = 7.0$ , 2 H), 2.39 (s, 3 H), 1.34 (t,  $J = 7.6$  Hz, 3 H), 0.81 (t,  $J = 7.6$  Hz, 3 H);  $^{13}\text{C}$  NMR (100 MHz,  $\text{CDCl}_3$ )  $\delta$  193.4, 167.6, 163.9, 139.6, 136.3, 132.5, 132.5, 129.7, 129.0, 128.3, 122.5, 118.2, 116.2, 60.9, 60.4, 14.2, 13.4, 12.0; HRMS (ESI)  $m/z$ :  $[\text{M} + \text{H}]^+$  Calcd for  $\text{C}_{20}\text{H}_{22}\text{NO}_5$  356.1492; Found 356.1501.

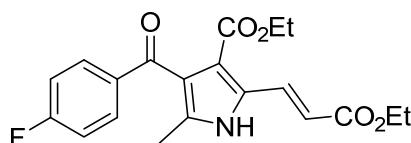

**Ethyl (E)-2-(3-ethoxy-3-oxoprop-1-en-1-yl)-4-(4-fluorobenzoyl)-5-methyl-1H-pyrrole-3-carboxylate (3b).** Eluent:  $V_{\text{PET}}/V_{\text{EA}} = 5:1$ ; white solid (42.5 mg, 57% yield); mp 151-153-°C;  $^1\text{H}$  NMR (400 MHz,  $\text{CDCl}_3$ )  $\delta$  10.67 (s, 1 H), 8.19 (d,  $J = 16.4$  Hz, 1 H), 7.91-7.79 (m, 2 H), 7.10 (t,  $J = 8.4$  Hz, 2 H), 6.47 (d,  $J = 16.4$  Hz, 1 H), 4.29 (q,  $J = 7.0$  Hz, 2 H), 3.88 (q,  $J = 7.0$  Hz, 2 H), 2.36 (s, 3 H), 1.34 (t,  $J = 7.0$  Hz, 3 H), 0.88 (t,  $J = 7.0$  Hz, 3 H);  $^{13}\text{C}$  NMR (100 MHz,  $\text{CDCl}_3$ )  $\delta$  191.8, 165.7 (d,  $J_{\text{C-F}} = 386$  Hz), 165.4 (d,  $J_{\text{C-F}} = 253$  Hz), 136.1, 136.0, 132.5, 131.6, 131.5, 129.9, 122.3, 117.9, 116.3, 115.5 (d,  $J_{\text{C-F}} = 22$  Hz), 61.1, 60.5, 14.2, 13.5, 11.9; HRMS (ESI)  $m/z$ :  $[\text{M} + \text{H}]^+$  Calcd for  $\text{C}_{20}\text{H}_{21}\text{FNO}_5$  374.1398; Found 374.1405.

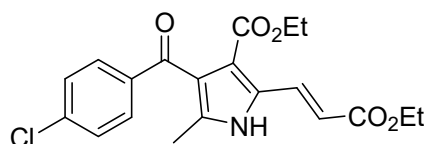

**Ethyl (E)-4-(4-chlorobenzoyl)-2-(3-ethoxy-3-oxoprop-1-en-1-yl)-5-methyl-1H-pyrrole-3-carboxylate (3c).** Eluent:  $V_{\text{PET}}/V_{\text{EA}} = 5:1$ ; white solid (45.1 mg, 58% yield); mp 147-149°C;  $^1\text{H}$  NMR (400 MHz,  $\text{CDCl}_3$ )  $\delta$  10.62 (s, 1 H), 8.18 (d,  $J = 16.2$  Hz, 1 H), 7.75 (d,  $J = 8.2$  Hz, 2 H), 7.39 (d,  $J = 8.2$  Hz, 2 H), 6.46 (d,  $J = 16.2$  Hz, 1 H), 4.29 (q,  $J = 7.0$  Hz, 2 H), 3.87 (q,  $J = 7.0$  Hz, 2 H), 2.37 (s, 3 H), 1.35 (t,  $J = 7.0$  Hz, 3 H), 0.89 (t,  $J = 7.0$  Hz, 3 H);  $^{13}\text{C}$  NMR (100 MHz,  $\text{CDCl}_3$ )  $\delta$  192.0, 167.6, 163.7, 138.9, 137.9, 136.4, 132.5, 130.4, 129.9, 128.6, 122.2, 117.9, 116.3, 61.1, 60.5, 14.2, 13.5, 12.0; HRMS (ESI)  $m/z$ :  $[\text{M} + \text{H}]^+$  Calcd for  $\text{C}_{20}\text{H}_{21}\text{ClNO}_5$  390.1103; Found 390.1108.

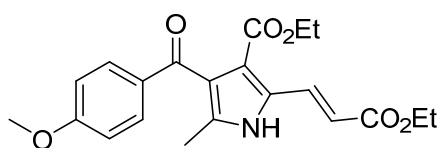

**Ethyl (E)-2-(3-ethoxy-3-oxoprop-1-en-1-yl)-4-(4-methoxybenzoyl)-5-methyl-1H-pyrrole-3-carboxylate (3d).** Eluent:  $V_{\text{PET}}/V_{\text{EA}} = 3:1$ ; white solid (47.8 mg, 62% yield); mp 154-156°C;  $^1\text{H}$  NMR (400 MHz,  $\text{CDCl}_3$ )  $\delta$  10.59 (s, 1 H), 8.19 (d,  $J = 16.4$  Hz, 1 H), 7.80 (d,  $J = 8.8$  Hz, 2 H), 6.90 (d,  $J = 8.8$  Hz, 2 H), 6.44 (d,  $J = 16.4$  Hz, 1 H), 4.27 (q,  $J = 7.0$  Hz, 2 H), 3.95-3.82 (m, 5 H), 2.31 (s, 3 H), 1.33 (t,  $J = 7.0$  Hz, 3 H), 0.87 (t,  $J = 7.2$  Hz, 3 H);  $^{13}\text{C}$  NMR (100 MHz,  $\text{CDCl}_3$ )  $\delta$  192.3, 167.6, 163.9,

163.3, 135.3, 132.5, 132.4, 131.4, 129.7, 122.9, 117.9, 116.0, 113.6, 60.9, 60.4, 55.5, 14.3, 13.5, 11.8; HRMS (ESI)  $m/z$ :  $[M + H]^+$  Calcd for  $C_{21}H_{24}NO_6$  386.1598; Found 386.1605.

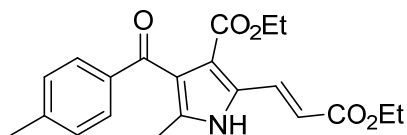

**Ethyl (E)-2-(3-ethoxy-3-oxoprop-1-en-1-yl)-5-methyl-4-(4-methylbenzoyl)-1H-pyrrole-3-carboxylate (3e).** Eluent:  $V_{PET}/V_{EA} = 5:1$ ; white solid (48.0 mg, 65% yield); mp 138-140°C;  $^1H$  NMR (400 MHz,  $CDCl_3$ )  $\delta$  10.71 (s, 1 H), 8.18 (d,  $J = 16.2$  Hz, 1 H), 7.71 (d,  $J = 8.0$  Hz, 2 H), 7.21 (d,  $J = 7.8$  Hz, 2 H), 6.45 (d,  $J = 16.4$  Hz, 1 H), 4.27 (q,  $J = 7.0$  Hz, 2 H), 3.84 (q,  $J = 7.0$  Hz, 2 H), 2.40 (s, 3 H), 2.33 (s, 3 H), 1.33 (t,  $J = 7.2$  Hz, 3 H), 0.84 (t,  $J = 7.0$  Hz, 3 H);  $^{13}C$  NMR (100 MHz,  $CDCl_3$ )  $\delta$  193.3, 167.6, 164.0, 143.4, 136.9, 135.8, 132.5, 129.7, 129.3, 129.0, 122.8, 118.0, 116.1, 60.9, 60.4, 21.6, 14.3, 13.4, 11.9; HRMS (ESI)  $m/z$ :  $[M + H]^+$  Calcd for  $C_{21}H_{24}NO_5$  370.1649; Found 370.1654.

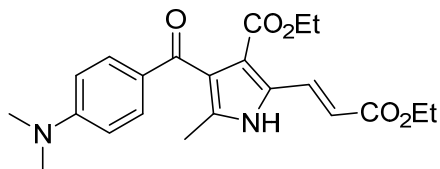

**Ethyl (E)-4-(4-(dimethylamino)benzoyl)-2-(3-ethoxy-3-oxoprop-1-en-1-yl)-5-methyl-1H-pyrrole-3-carboxylate (3f).** Eluent:  $V_{PET}/V_{EA} = 3:1$ ; white solid (47.8 mg, 60% yield); mp 243-245°C;  $^1H$  NMR (400 MHz,  $DMSO-d_6$ )  $\delta$  12.17 (s, 1 H), 8.00 (d,  $J = 16.2$  Hz, 1 H), 7.54 (d,  $J = 9.0$  Hz, 2 H), 6.68 (d,  $J = 9.0$  Hz, 2 H), 6.53 (d,  $J = 16.2$  Hz, 1 H), 4.18 (q,  $J = 7.0$  Hz, 2 H), 3.83 (q,  $J = 7.0$  Hz, 2 H), 2.99 (s, 6 H), 2.17 (s, 3 H), 1.25 (t,  $J = 7.0$  Hz, 3 H), 0.80 (t,  $J = 7.0$  Hz, 3 H);  $^{13}C$  NMR (100 MHz,  $DMSO-d_6$ )  $\delta$  190.4, 166.8, 163.9, 153.5, 134.4, 132.3, 131.2, 129.2, 127.0, 123.6, 117.4, 116.0, 111.0, 60.4, 60.1, 40.1, 14.6, 13.8, 12.0; HRMS (ESI)  $m/z$ :  $[M + H]^+$  Calcd for  $C_{22}H_{27}N_2O_5$  399.1914; Found 399.1940.

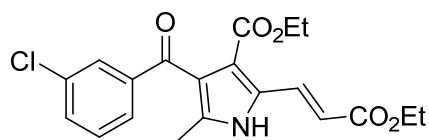

**Ethyl (E)-4-(3-chlorobenzoyl)-2-(3-ethoxy-3-oxoprop-1-en-1-yl)-5-methyl-1H-pyrrole-3-carboxylate (3g).** Eluent:  $V_{\text{PET}}/V_{\text{EA}} = 5:1$ ; white solid (41.2 mg, 53% yield); mp 90-92°C;  $^1\text{H NMR}$  (400 MHz,  $\text{CDCl}_3$ )  $\delta$  10.67 (s, 1 H), 8.18 (d,  $J = 16.2$  Hz, 1 H), 7.79 (s, 1 H), 7.66 (d,  $J = 7.6$  Hz, 1 H), 7.49 (d,  $J = 8.0$  Hz, 1 H), 7.35 (t,  $J = 7.8$  Hz, 1 H), 6.47 (d,  $J = 16.2$  Hz, 1 H), 4.29 (q,  $J = 7.2$  Hz, 2 H), 3.87 (q,  $J = 7.1$  Hz, 2 H), 2.38 (s, 3 H), 1.34 (t,  $J = 7.0$  Hz, 3 H), 0.89 (t,  $J = 7.0$  Hz, 3 H);  $^{13}\text{C NMR}$  (100 MHz,  $\text{CDCl}_3$ )  $\delta$  191.8, 167.6, 163.7, 141.3, 136.7, 134.7, 132.5, 132.3, 129.9, 129.7, 128.9, 127.1, 122.0, 118.0, 116.4, 61.1, 60.6, 14.2, 13.5, 12.0; HRMS (ESI)  $m/z$ :  $[\text{M} + \text{H}]^+$  Calcd for  $\text{C}_{20}\text{H}_{21}\text{ClNO}_5$  390.1103; Found 390.1111.

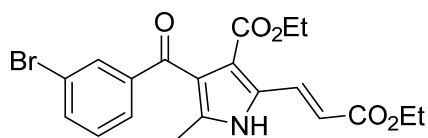

**Ethyl (E)-4-(3-bromobenzoyl)-2-(3-ethoxy-3-oxoprop-1-en-1-yl)-5-methyl-1H-pyrrole-3-carboxylate (3h).** Eluent:  $V_{\text{PET}}/V_{\text{EA}} = 5:1$ ; white solid (44.2 mg, 51% yield); mp 107-109°C;  $^1\text{H NMR}$  (400 MHz,  $\text{CDCl}_3$ )  $\delta$  10.67 (s, 1 H), 8.18 (d,  $J = 16.2$  Hz, 1 H), 7.95 (s, 1 H), 7.71 (d,  $J = 7.6$  Hz, 1 H), 7.65 (d,  $J = 7.8$  Hz, 1 H), 7.30 (d,  $J = 7.8$  Hz, 1 H), 6.47 (d,  $J = 16.2$  Hz, 1 H), 4.29 (q,  $J = 7.0$  Hz, 2 H), 3.87 (q,  $J = 7.0$  Hz, 2 H), 2.39 (s, 3 H), 1.35 (t,  $J = 7.0$  Hz, 3 H), 0.89 (t,  $J = 7.0$  Hz, 3 H);  $^{13}\text{C NMR}$  (100 MHz,  $\text{CDCl}_3$ )  $\delta$  191.6, 167.6, 163.7, 141.5, 136.8, 135.2, 132.5, 131.8, 129.9, 129.9, 127.5, 122.7, 121.9, 118.0, 116.4, 61.1, 60.6, 14.2, 13.5, 12.1; HRMS (ESI)  $m/z$ :  $[\text{M} + \text{H}]^+$  Calcd for  $\text{C}_{20}\text{H}_{21}\text{BrNO}_5$  434.0598; Found 434.0602.

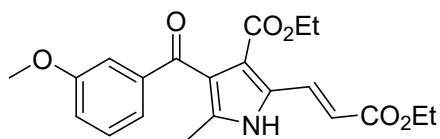

**Ethyl (E)-2-(3-ethoxy-3-oxoprop-1-en-1-yl)-4-(3-methoxybenzoyl)-5-methyl-1H-pyrrole-3-carboxylate (3i).** Eluent:  $V_{\text{PET}}/V_{\text{EA}} = 3:1$ ; white solid (44.7 mg, 58% yield); mp 121-123°C;  $^1\text{H NMR}$  (400 MHz,  $\text{CDCl}_3$ )  $\delta$  10.70 (s, 1 H), 8.16 (d,  $J = 16.2$  Hz, 1 H), 7.39 (s, 1 H), 7.37-7.28 (m, 2 H), 7.11-7.03 (m, 1 H), 6.46 (d,  $J = 16.2$  Hz, 1 H), 4.27 (q,  $J = 7.0$  Hz, 2 H), 3.88-3.79 (m, 5 H), 2.37 (s, 3 H), 1.33 (t,  $J = 7.1$  Hz, 3 H), 0.87 (t,  $J = 7.0$  Hz, 3 H);  $^{13}\text{C NMR}$  (100 MHz,  $\text{CDCl}_3$ )  $\delta$  193.1, 167.6, 163.9,

159.7, 140.9, 136.4, 132.5, 129.6, 129.4, 122.5, 122.0, 119.2, 118.3, 116.1, 112.9, 61.0, 60.5, 55.4, 14.2, 13.5, 12.0; HRMS (ESI)  $m/z$ :  $[M + H]^+$  Calcd for  $C_{21}H_{24}NO_6$  386.1598; Found 386.1605.

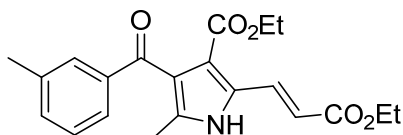

**Ethyl (E)-2-(3-ethoxy-3-oxoprop-1-en-1-yl)-5-methyl-4-(3-methylbenzoyl)-1H-pyrrole-3-carboxylate (3j).** Eluent:  $V_{PET}/V_{EA} = 5:1$ ; white solid (43.6 mg, 59% yield); mp 92-94°C;  $^1H$  NMR (400 MHz,  $CDCl_3$ )  $\delta$  10.58 (s, 1 H), 8.16 (d,  $J = 16.2$  Hz, 1 H), 7.63 (s, 1 H), 7.58 (d,  $J = 7.4$  Hz, 1 H), 7.37-7.28 (m, 2 H), 6.44 (d,  $J = 16.4$  Hz, 1 H), 4.27 (q,  $J = 7.0$  Hz, 2 H), 3.82 (q,  $J = 7.0$  Hz, 2 H), 2.37 (s, 3 H), 2.36 (s, 3 H), 1.33 (t,  $J = 7.0$  Hz, 3 H), 0.83 (t,  $J = 7.0$  Hz, 3 H);  $^{13}C$  NMR (100 MHz,  $CDCl_3$ )  $\delta$  193.5, 167.6, 163.9, 139.6, 138.1, 136.3, 133.3, 132.5, 129.6, 129.4, 128.3, 126.4, 122.7, 118.3, 116.0, 61.0, 60.4, 21.3, 14.3, 13.4, 12.0; HRMS (ESI)  $m/z$ :  $[M + H]^+$  Calcd for  $C_{21}H_{24}NO_5$  370.1649; Found 370.1658.

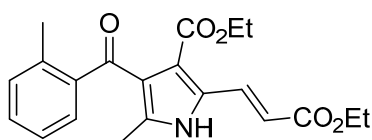

**Ethyl (E)-2-(3-ethoxy-3-oxoprop-1-en-1-yl)-5-methyl-4-(2-methylbenzoyl)-1H-pyrrole-3-carboxylate (3k).** Eluent:  $V_{PET}/V_{EA} = 5:1$ ; white solid (44.3 mg, 60% yield); mp 93-95°C;  $^1H$  NMR (400 MHz,  $CDCl_3$ )  $\delta$  10.71 (s, 1 H), 8.03 (d,  $J = 16.2$  Hz, 1 H), 7.32 (t,  $J = 7.2$  Hz, 2 H), 7.26 (d,  $J = 7.6$  Hz, 1 H), 7.13 (t,  $J = 7.4$  Hz, 1 H), 6.42 (d,  $J = 16.2$  Hz, 1 H), 4.26 (q,  $J = 7.0$  Hz, 2 H), 3.77 (q,  $J = 7.0$  Hz, 2 H), 2.56 (s, 3 H), 2.37 (s, 3 H), 1.32 (t,  $J = 7.0$  Hz, 3 H), 0.95 (t,  $J = 7.2$  Hz, 3 H);  $^{13}C$  NMR (100 MHz,  $CDCl_3$ )  $\delta$  194.8, 167.6, 164.1, 139.8, 138.2, 132.4, 131.5, 130.9, 129.7, 129.3, 125.4, 123.5, 119.1, 116.0, 61.0, 60.6, 20.8, 14.2, 13.6, 12.4; HRMS (ESI)  $m/z$ :  $[M + H]^+$  Calcd for  $C_{21}H_{24}NO_5$  370.1649; Found 370.1656.

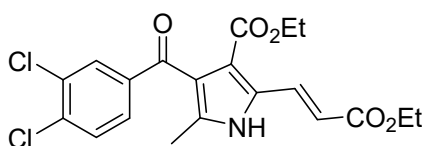



**Ethyl (E)-4-(3,4-dichlorobenzoyl)-2-(3-ethoxy-3-oxoprop-1-en-1-yl)-5-methyl-1H-pyrrole-3-carboxylate (3l).** Eluent:  $V_{\text{PET}}/V_{\text{EA}} = 5:1$ ; white solid (43.2 mg, 51% yield); mp 170-172°C;  $^1\text{H}$  NMR (400 MHz,  $\text{CDCl}_3$ )  $\delta$  10.73 (s, 1 H), 8.18 (d,  $J = 16.2$  Hz, 1 H), 7.92-7.87 (m, 1 H), 7.65-7.60 (m, 1 H), 7.50 (d,  $J = 8.2$  Hz, 1 H), 6.47 (d,  $J = 16.4$  Hz, 1 H), 4.29 (q,  $J = 7.0$  Hz, 2 H), 3.93 (q,  $J = 7.0$  Hz, 2 H), 2.37 (s, 3 H), 1.35 (t,  $J = 7.0$  Hz, 3 H), 0.95 (t,  $J = 7.0$  Hz, 3 H);  $^{13}\text{C}$  NMR (100 MHz,  $\text{CDCl}_3$ )  $\delta$  190.7, 167.6, 163.5, 139.3, 136.9, 136.7, 133.0, 132.5, 130.8, 130.4, 130.0, 128.0, 121.8, 117.7, 116.5, 61.1, 60.7, 14.2, 13.6, 12.0; HRMS (ESI)  $m/z$ :  $[\text{M} + \text{H}]^+$  Calcd for  $\text{C}_{20}\text{H}_{20}\text{Cl}_2\text{NO}_5$  424.0713; Found 424.0718.

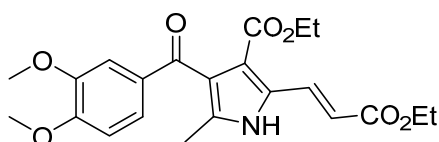

**Ethyl (E)-4-(3,4-dimethoxybenzoyl)-2-(3-ethoxy-3-oxoprop-1-en-1-yl)-5-methyl-1H-pyrrole-3-carboxylate (3m).** Eluent:  $V_{\text{PET}}/V_{\text{EA}} = 3:1$ ; white solid (49.8 mg, 60% yield); mp 132-134°C;  $^1\text{H}$  NMR (400 MHz,  $\text{CDCl}_3$ )  $\delta$  10.71 (s, 1 H), 8.18 (d,  $J = 16.2$  Hz, 1 H), 7.52 (s, 1 H), 7.39-7.31 (m, 1 H), 6.83 (d,  $J = 8.4$  Hz, 1 H), 6.46 (d,  $J = 16.2$  Hz, 1 H), 4.27 (q,  $J = 7.2$  Hz, 2 H), 3.95-3.86 (m, 8 H), 2.33 (s, 3 H), 1.33 (t,  $J = 7.0$  Hz, 3 H), 0.90 (t,  $J = 7.0$  Hz, 3 H);  $^{13}\text{C}$  NMR (100 MHz,  $\text{CDCl}_3$ )  $\delta$  192.2, 167.6, 164.0, 153.0, 148.9, 135.4, 132.5, 129.6, 124.5, 122.7, 118.1, 116.0, 110.8, 109.9, 60.9, 60.4, 56.1, 56.0, 14.2, 13.6, 11.9; HRMS (ESI)  $m/z$ :  $[\text{M} + \text{H}]^+$  Calcd for  $\text{C}_{22}\text{H}_{26}\text{NO}_7$  416.1704; Found 416.1712.

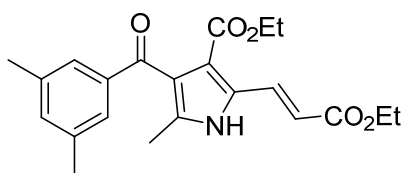

**Ethyl (E)-4-(3,5-dimethylbenzoyl)-2-(3-ethoxy-3-oxoprop-1-en-1-yl)-5-methyl-1H-pyrrole-3-carboxylate (3n).** Eluent:  $V_{\text{PET}}/V_{\text{EA}} = 5:1$ ; white solid (47.5 mg, 62% yield); mp 107-109°C;  $^1\text{H}$  NMR (400 MHz,  $\text{CDCl}_3$ )  $\delta$  10.72 (s, 1 H), 8.16 (d,  $J = 16.2$  Hz, 1 H), 7.41 (s, 2 H), 7.15 (s, 1 H), 6.46 (d,  $J = 16.2$  Hz, 1 H), 4.27 (q,  $J = 7.0$  Hz, 2 H), 3.83 (q,  $J = 7.0$  Hz, 2 H), 2.37-2.29 (m, 9 H), 1.33 (t,  $J = 7.0$  Hz, 3 H), 0.85 (t,  $J = 7.0$  Hz, 3 H);  $^{13}\text{C}$  NMR (100 MHz,  $\text{CDCl}_3$ )  $\delta$  193.7, 167.6, 164.0, 139.6, 138.0, 136.2,

134.2, 132.5, 129.5, 126.9, 122.8, 118.4, 116.0, 60.9, 60.4, 21.1, 14.2, 13.4, 12.0; HRMS (ESI)  $m/z$ :  $[M + H]^+$  Calcd for  $C_{22}H_{26}NO_5$  384.1805; Found 384.1814.

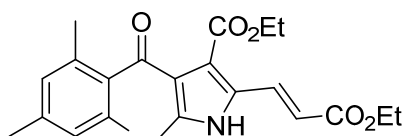

**Ethyl (E)-2-(3-ethoxy-3-oxoprop-1-en-1-yl)-5-methyl-4-(2,4,6-trimethylbenzoyl)-1H-pyrrole-3-carboxylate (3o).** Eluent:  $V_{PET}/V_{EA} = 10:1$ ; colourless liquid (50.0 mg, 63% yield);  $^1H$  NMR (400 MHz,  $CDCl_3$ )  $\delta$  10.64 (s, 1 H), 7.69 (d,  $J = 16.0$  Hz, 1 H), 6.81 (s, 2 H), 6.32 (d,  $J = 16.2$  Hz, 1 H), 4.21 (q,  $J = 7.0$  Hz, 2 H), 4.01 (q,  $J = 7.0$  Hz, 2 H), 2.27 (s, 3 H), 2.14 (s, 6 H), 2.11 (s, 3 H), 1.29 (t,  $J = 7.0$  Hz, 3 H), 1.21 (t,  $J = 7.0$  Hz, 3 H);  $^{13}C$  NMR (100 MHz,  $CDCl_3$ )  $\delta$  194.9, 167.4, 165.0, 139.7, 138.7, 138.3, 134.6, 131.8, 128.6, 128.1, 123.5, 120.9, 115.5, 61.1, 60.8, 21.1, 19.6, 14.2, 13.9, 12.8; HRMS (ESI)  $m/z$ :  $[M + H]^+$  Calcd for  $C_{23}H_{28}NO_5$  398.1962; Found 398.1969.

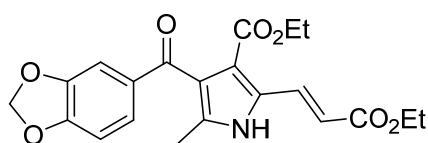

**Ethyl (E)-4-(benzo[d][1,3]dioxole-5-carbonyl)-2-(3-ethoxy-3-oxoprop-1-en-1-yl)-5-methyl-1H-pyrrole-3-carboxylate (3p).** Eluent:  $V_{PET}/V_{EA} = 3:1$ ; white solid (49.5mg, 62% yield); mp 147-149°C;  $^1H$  NMR (400 MHz,  $CDCl_3$ )  $\delta$  10.66 (s, 1 H), 8.18 (d,  $J = 16.2$  Hz, 1 H), 7.40-7.31 (m, 2 H), 6.78 (d,  $J = 8.0$  Hz, 1 H), 6.43 (d,  $J = 16.2$  Hz, 1 H), 6.03 (s, 2 H), 4.27 (q,  $J = 7.0$  Hz, 2 H), 3.96 (q,  $J = 7.0$  Hz, 2 H), 2.29 (s, 3 H), 1.33 (t,  $J = 7.0$  Hz, 3 H), 0.96 (t,  $J = 7.0$  Hz, 3 H);  $^{13}C$  NMR (100 MHz,  $CDCl_3$ )  $\delta$  191.9, 167.6, 163.8, 151.5, 148.1, 135.1, 134.2, 132.5, 129.7, 126.0, 122.9, 117.8, 116.1, 108.6, 107.7, 101.8, 60.9, 60.4, 14.2, 13.7, 11.8; HRMS (ESI)  $m/z$ :  $[M + H]^+$  Calcd for  $C_{21}H_{22}NO_7$  400.1391; Found 400.1399.

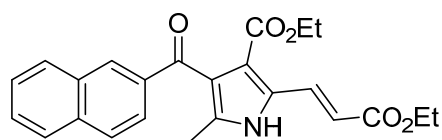

**Ethyl (E)-4-(2-naphthoyl)-2-(3-ethoxy-3-oxoprop-1-en-1-yl)-5-methyl-1H-pyrrole-3-carboxylate (3q).** Eluent:  $V_{PET}/V_{EA} = 5:1$ ; white solid (42.1 mg, 52% yield); mp 166-168°C;  $^1H$  NMR (400 MHz,  $CDCl_3$ )  $\delta$  10.70 (s, 1 H), 8.27-8.16 (m, 2

H), 7.99 (d,  $J = 8.4$  Hz, 1 H), 7.92-7.83 (m, 3 H), 7.57 (t,  $J = 7.4$  Hz, 1 H), 7.51 (t,  $J = 7.4$  Hz, 1 H), 6.51 (d,  $J = 16.2$  Hz, 1 H), 4.28 (q,  $J = 7.2$  Hz, 2 H), 3.73 (q,  $J = 7.2$  Hz, 2 H), 2.40 (s, 3 H), 1.33 (t,  $J = 7.0$  Hz, 3 H), 0.71 (t,  $J = 7.0$  Hz, 3 H);  $^{13}\text{C}$  NMR (100 MHz,  $\text{CDCl}_3$ )  $\delta$  193.3, 167.6, 163.9, 136.9, 136.1, 135.3, 132.6, 132.5, 132.0, 130.9, 129.8, 129.5, 128.3, 127.7, 126.7, 124.7, 122.8, 118.3, 116.2, 61.0, 60.4, 14.3, 13.4, 12.1; HRMS (ESI)  $m/z$ :  $[\text{M} + \text{H}]^+$  Calcd for  $\text{C}_{24}\text{H}_{24}\text{NO}_5$  406.1649; Found 406.1657.

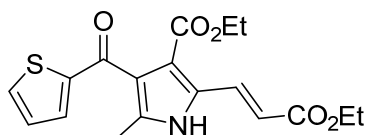

**Ethyl (E)-2-(3-ethoxy-3-oxoprop-1-en-1-yl)-5-methyl-4-(thiophene-2-carbonyl)-1H-pyrrole-3-carboxylate (3r).** Eluent:  $V_{\text{PET}}/V_{\text{EA}} = 5:1$ ; white solid (46.2 mg, 64% yield); mp 139-141°C;  $^1\text{H}$  NMR (400 MHz,  $\text{CDCl}_3$ )  $\delta$  10.82 (s, 1 H), 8.19 (d,  $J = 16.4$  Hz, 1 H), 7.64 (d,  $J = 4.2$  Hz, 1 H), 7.46 (d,  $J = 2.8$  Hz, 1 H), 7.15-7.00 (m, 1 H), 6.47 (d,  $J = 16.4$  Hz, 1 H), 4.27 (q,  $J = 7.0$  Hz, 2 H), 3.97 (q,  $J = 7.0$  Hz, 2 H), 2.36 (s, 3 H), 1.33 (t,  $J = 7.0$  Hz, 3 H), 0.93 (t,  $J = 7.0$  Hz, 3 H);  $^{13}\text{C}$  NMR (100 MHz,  $\text{CDCl}_3$ )  $\delta$  185.5, 167.6, 163.9, 146.3, 135.5, 133.6, 132.4, 130.0, 128.0, 122.6, 117.6, 116.3, 60.9, 60.5, 14.2, 13.5, 11.8; HRMS (ESI)  $m/z$ :  $[\text{M} + \text{H}]^+$  Calcd for  $\text{C}_{18}\text{H}_{20}\text{SNO}_5$  362.1057; Found 362.1064.

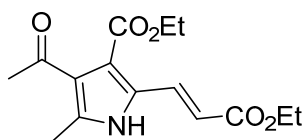

**Ethyl (E)-4-acetyl-2-(3-ethoxy-3-oxoprop-1-en-1-yl)-5-methyl-1H-pyrrole-3-carboxylate (3s).** Eluent:  $V_{\text{PET}}/V_{\text{EA}} = 5:1$ ; white solid (28.1 mg, 48% yield); mp 124-126°C;  $^1\text{H}$  NMR (400 MHz,  $\text{CDCl}_3$ )  $\delta$  10.61 (s, 1 H), 7.99 (d,  $J = 16.2$  Hz, 1 H), 6.37 (d,  $J = 16.2$  Hz, 1 H), 4.37 (q,  $J = 7.2$  Hz, 2 H), 4.26 (q,  $J = 7.2$  Hz, 2 H), 2.44 (s, 3 H), 2.42 (s, 3 H), 1.39 (t,  $J = 7.0$  Hz, 3 H), 1.33 (t,  $J = 7.0$  Hz, 3 H);  $^{13}\text{C}$  NMR (100 MHz,  $\text{CDCl}_3$ )  $\delta$  197.9, 167.4, 164.6, 137.2, 132.4, 129.0, 124.3, 118.0, 116.0, 61.1, 60.9, 30.9, 14.2, 14.1, 12.9; HRMS (ESI)  $m/z$ :  $[\text{M} + \text{H}]^+$  Calcd for  $\text{C}_{15}\text{H}_{20}\text{NO}_5$  294.1336; Found 294.1343.

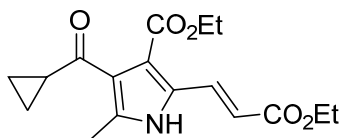

**Ethyl (E)-4-(cyclopropanecarbonyl)-2-(3-ethoxy-3-oxoprop-1-en-1-yl)-5-methyl-1H-pyrrole-3-carboxylate (3t).** Eluent:  $V_{\text{PET}}/V_{\text{EA}} = 3:1$ ; colourless liquid (29.4 mg, 46% yield);  $^1\text{H NMR}$  (400 MHz,  $\text{CDCl}_3$ )  $\delta$  10.45 (s, 1 H), 8.07 (d,  $J = 16.2$  Hz, 1 H), 6.35 (d,  $J = 16.2$  Hz, 1 H), 4.32 (q,  $J = 7.0$  Hz, 2 H), 4.25 (q,  $J = 7.0$  Hz, 2 H), 2.34 (s, 3 H), 2.23-2.18 (m, 1 H), 1.39-1.29 (m, 6 H), 1.22-1.16 (m, 2 H), 0.99-0.91 (m, 2 H);  $^{13}\text{C NMR}$  (100 MHz,  $\text{CDCl}_3$ )  $\delta$  200.7, 167.5, 164.4, 135.4, 132.5, 129.4, 125.2, 117.4, 115.9, 60.9, 22.5, 14.2, 14.1, 12.4, 12.1; HRMS (ESI)  $m/z$ :  $[\text{M} + \text{H}]^+$  Calcd for  $\text{C}_{17}\text{H}_{22}\text{NO}_5$  320.1492; Found 320.1498.

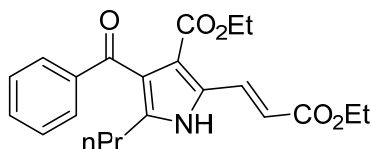

**Ethyl (E)-4-benzoyl-2-(3-ethoxy-3-oxoprop-1-en-1-yl)-5-propyl-1H-pyrrole-3-carboxylate (3u).** Eluent:  $V_{\text{PET}}/V_{\text{EA}} = 10:1$ ; white solid (39.9 mg, 52% yield); mp 119-121°C;  $^1\text{H NMR}$  (400 MHz,  $\text{CDCl}_3$ )  $\delta$  10.47 (s, 1 H), 8.21 (d,  $J = 16.2$  Hz, 1 H), 7.85-7.77 (m, 2 H), 7.54-7.49 (m, 1 H), 7.44-7.38 (m, 2 H), 6.53 (d,  $J = 16.4$  Hz, 1 H), 4.26 (q,  $J = 7.0$  Hz, 2 H), 3.80 (q,  $J = 7.0$  Hz, 2 H), 2.70 (t,  $J = 7.6$  Hz, 2 H), 1.72-1.61 (m, 2 H), 1.32 (t,  $J = 7.0$  Hz, 3 H), 0.87 (t,  $J = 7.4$  Hz, 3 H), 0.80 (t,  $J = 7.2$  Hz, 3 H);  $^{13}\text{C NMR}$  (100 MHz,  $\text{CDCl}_3$ )  $\delta$  193.4, 167.6, 163.9, 140.4, 139.7, 132.6, 129.8, 129.0, 128.3, 127.7, 122.5, 117.9, 116.2, 60.9, 60.3, 28.3, 23.2, 14.3, 13.7, 13.4; HRMS (ESI)  $m/z$ :  $[\text{M} + \text{H}]^+$  Calcd for  $\text{C}_{22}\text{H}_{26}\text{NO}_5$  384.1805; Found  $\text{C}_{22}\text{H}_{26}\text{NO}_5$  384.1810.

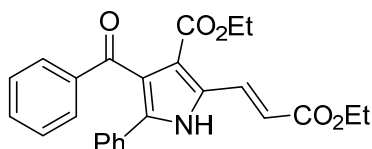

**Ethyl (E)-4-benzoyl-2-(3-ethoxy-3-oxoprop-1-en-1-yl)-5-phenyl-1H-pyrrole-3-carboxylate (3v).** Eluent:  $V_{\text{PET}}/V_{\text{EA}} = 10:1$ ; white solid (45.1 mg, 54% yield); mp 191-193°C;  $^1\text{H NMR}$  (400 MHz,  $\text{CDCl}_3$ )  $\delta$  10.59 (s, 1 H), 8.27 (d,  $J = 16.4$  Hz, 1 H), 7.87 (d,  $J = 7.6$  Hz, 2 H), 7.51 (t,  $J = 7.2$  Hz, 1 H), 7.46-7.36 (m, 4 H), 7.24-7.16 (m, 3 H), 6.70 (d,  $J = 16.4$  Hz, 1 H), 4.12 (q,  $J = 7.0$  Hz, 2 H), 3.95 (q,  $J = 7.0$  Hz, 2 H),

1.23 (t,  $J = 7.0$  Hz, 3 H), 0.87 (t,  $J = 7.0$  Hz, 3 H);  $^{13}\text{C}$  NMR (100 MHz,  $\text{CDCl}_3$ )  $\delta$  194.2, 167.5, 163.4, 138.6, 135.2, 133.0, 132.3, 131.4, 130.0, 129.4, 128.6, 128.5, 128.4, 127.6, 123.2, 118.1, 117.3, 61.0, 60.5, 14.2, 13.4; HRMS (ESI)  $m/z$ :  $[\text{M} + \text{H}]^+$  Calcd for  $\text{C}_{25}\text{H}_{24}\text{NO}_5$  418.1649; Found 418.1657.

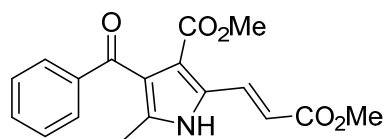

**Methyl (*E*)-4-benzoyl-2-(3-methoxy-3-oxoprop-1-en-1-yl)-5-methyl-1*H*-pyrrole-3-carboxylate (3w).** Eluent:  $V_{\text{PET}}/V_{\text{EA}} = 5:1$ ; white solid (39.9 mg, 61% yield); mp 203-205°C;  $^1\text{H}$  NMR (400 MHz,  $\text{DMSO}-d_6$ )  $\delta$  12.39 (s, 1 H), 7.92 (d,  $J = 16.2$  Hz, 1 H), 7.64 (d,  $J = 7.2$  Hz, 2 H), 7.59 (t,  $J = 7.2$  Hz, 1 H), 7.48 (t,  $J = 7.4$  Hz, 2 H), 6.58 (d,  $J = 16.2$  Hz, 1 H), 3.74 (s, 3 H), 3.18 (s, 3 H), 2.28 (s, 3 H);  $^{13}\text{C}$  NMR (100 MHz,  $\text{DMSO}-d_6$ )  $\delta$  192.3, 167.1, 164.1, 140.0, 137.0, 132.7, 132.0, 129.4, 128.9, 128.6, 122.2, 117.8, 116.5, 52.0, 51.2, 12.2; HRMS (ESI)  $m/z$ :  $[\text{M} + \text{H}]^+$  Calcd for  $\text{C}_{18}\text{H}_{18}\text{NO}_5$  328.1179; Found 328.1188.

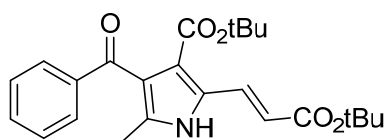

**tert-Butyl (*E*)-4-benzoyl-2-(3-(tert-butoxy)-3-oxoprop-1-en-1-yl)-5-methyl-1*H*-pyrrole-3-carboxylate (3x).** Eluent:  $V_{\text{PET}}/V_{\text{EA}} = 8:1$ ; white solid (53.5 mg, 65% yield); mp 142-144°C;  $^1\text{H}$  NMR (400 MHz,  $\text{CDCl}_3$ )  $\delta$  10.57 (s, 1 H), 8.09 (d,  $J = 16.2$  Hz, 1 H), 7.85 (d,  $J = 7.0$  Hz, 2 H), 7.53 (t,  $J = 7.2$  Hz, 1 H), 7.42 (t,  $J = 7.6$  Hz, 2 H), 6.39 (d,  $J = 16.4$  Hz, 1 H), 2.37 (s, 3 H), 1.54 (s, 9 H), 1.13 (s, 9 H);  $^{13}\text{C}$  NMR (100 MHz,  $\text{CDCl}_3$ )  $\delta$  193.3, 167.1, 163.1, 139.5, 135.5, 132.5, 132.0, 129.5, 129.4, 128.3, 122.4, 119.6, 117.7, 81.2, 81.1, 28.2, 27.6, 12.0; HRMS (ESI)  $m/z$ :  $[\text{M} + \text{H}]^+$  Calcd for  $\text{C}_{24}\text{H}_{30}\text{NO}_5$  412.2118; Found 412.2123.

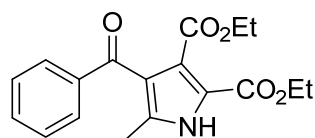

**Diethyl 4-benzoyl-5-methyl-1*H*-pyrrole-2,3-dicarboxylate (5a).** Eluent:  $V_{\text{PET}}/V_{\text{EA}} = 5:1$ ; colourless liquid (49.4 mg, 75% yield);  $^1\text{H}$  NMR (400 MHz,  $\text{CDCl}_3$ )  $\delta$  10.23 (s, 1

H), 7.73 (d,  $J = 7.6$  Hz, 2 H), 7.52 (t,  $J = 7.4$  Hz, 1 H), 7.42 (t,  $J = 7.6$  Hz, 2 H), 4.33 (q,  $J = 7.0$  Hz, 2 H), 3.80 (q,  $J = 7.2$  Hz, 2 H), 2.40 (s, 3 H), 1.33 (t,  $J = 7.0$  Hz, 3 H), 1.04 (t,  $J = 7.2$  Hz, 3 H);  $^{13}\text{C}$  NMR (100 MHz,  $\text{CDCl}_3$ )  $\delta$  192.0, 164.4, 160.5, 139.4, 137.4, 132.3, 128.8, 128.3, 123.1, 121.9, 119.5, 61.4, 61.2, 14.1, 13.6, 12.8; HRMS (ESI)  $m/z$ :  $[\text{M} + \text{H}]^+$  Calcd for  $\text{C}_{18}\text{H}_{20}\text{NO}_5$  330.1336; Found 330.1334.

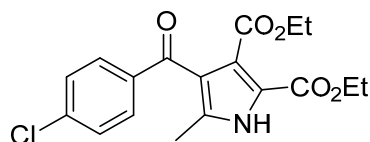

**Diethyl 4-(4-chlorobenzoyl)-5-methyl-1H-pyrrole-2,3-dicarboxylate (5b).** Eluent:  $V_{\text{PET}}/V_{\text{EA}} = 5:1$ ; white solid (53.0 mg, 73% yield); mp 96-98°C;  $^1\text{H}$  NMR (400 MHz,  $\text{CDCl}_3$ )  $\delta$  10.21 (s, 1 H), 7.68 (d,  $J = 8.4$  Hz, 2 H), 7.40 (d,  $J = 8.4$  Hz, 2 H), 4.34 (q,  $J = 7.0$  Hz, 2 H), 3.86 (q,  $J = 7.0$  Hz, 2 H), 2.41 (s, 3 H), 1.34 (t,  $J = 7.0$  Hz, 3 H), 1.07 (t,  $J = 7.0$  Hz, 3 H);  $^{13}\text{C}$  NMR (100 MHz,  $\text{CDCl}_3$ )  $\delta$  190.7, 164.4, 160.6, 138.7, 137.7, 137.6, 130.3, 128.6, 123.0, 121.5, 119.6, 61.6, 61.4, 14.1, 13.7, 12.9; HRMS (ESI)  $m/z$ :  $[\text{M} + \text{H}]^+$  Calcd for  $\text{C}_{18}\text{H}_{19}\text{ClNO}_5$  364.0946; Found 364.0953.

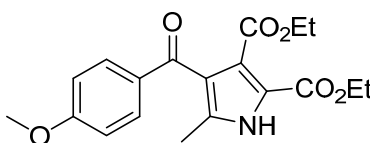

**Diethyl 4-(4-methoxybenzoyl)-5-methyl-1H-pyrrole-2,3-dicarboxylate (5c).** Eluent:  $V_{\text{PET}}/V_{\text{EA}} = 3:1$ ; colourless liquid (56.0 mg, 78% yield);  $^1\text{H}$  NMR (400 MHz,  $\text{CDCl}_3$ )  $\delta$  9.91 (s, 1 H), 7.75 (d,  $J = 8.8$  Hz, 2 H), 6.91 (d,  $J = 8.8$  Hz, 2 H), 4.34 (q,  $J = 7.0$  Hz, 2 H), 3.92-3.87 (m, 2 H), 3.86 (s, 3 H), 2.38 (s, 3 H), 1.34 (t,  $J = 7.0$  Hz, 3 H), 1.05 (t,  $J = 7.0$  Hz, 3 H);  $^{13}\text{C}$  NMR (100 MHz,  $\text{CDCl}_3$ )  $\delta$  190.7, 164.5, 163.1, 160.5, 136.4, 132.1, 131.3, 122.8, 122.3, 119.4, 113.5, 61.4, 61.2, 55.5, 14.1, 13.7, 12.7; HRMS (ESI)  $m/z$ :  $[\text{M} + \text{H}]^+$  Calcd for  $\text{C}_{19}\text{H}_{22}\text{NO}_6$  360.1442; Found 360.1449.

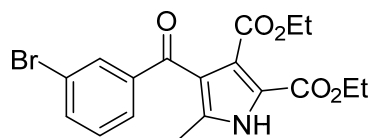

**Diethyl 4-(3-bromobenzoyl)-5-methyl-1H-pyrrole-2,3-dicarboxylate (5d).** Eluent:  $V_{\text{PET}}/V_{\text{EA}} = 5:1$ ; colourless liquid (60.2 mg, 74% yield);  $^1\text{H}$  NMR (400 MHz,  $\text{CDCl}_3$ )  $\delta$  10.31 (s, 1 H), 7.86 (s, 1 H), 7.69-7.61 (m, 2 H), 7.31 (t,  $J = 7.8$  Hz, 1 H), 4.34 (q,  $J$

= 7.0 Hz, 2 H), 3.87 (q,  $J = 7.2$  Hz, 2 H), 2.43 (s, 3 H), 1.34 (t,  $J = 7.0$  Hz, 3 H), 1.11 (t,  $J = 7.2$  Hz, 3 H);  $^{13}\text{C}$  NMR (100 MHz,  $\text{CDCl}_3$ )  $\delta$  190.4, 164.5, 160.6, 141.2, 138.2, 135.0, 131.7, 130.0, 127.4, 122.5, 121.1, 119.6, 77.3, 61.6, 61.5, 14.1, 13.7, 13.0; HRMS (ESI)  $m/z$ :  $[\text{M} + \text{H}]^+$  Calcd for  $\text{C}_{18}\text{H}_{19}\text{BrINO}_5$  408.0441; Found 408.0446.

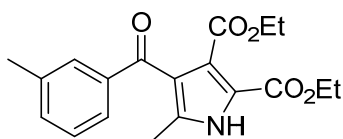

**Diethyl 5-methyl-4-(3-methylbenzoyl)-1H-pyrrole-2,3-dicarboxylate (5e).** Eluent:  $V_{\text{PET}}/V_{\text{EA}} = 5:1$ ; colourless liquid (54.9 mg, 80% yield);  $^1\text{H}$  NMR (400 MHz,  $\text{CDCl}_3$ )  $\delta$  9.75 (s, 1 H), 7.59-7.49 (m, 2 H), 7.36-7.28 (m, 2 H), 4.33 (q,  $J = 7.0$  Hz, 2 H), 3.80 (q,  $J = 7.2$  Hz, 2 H), 2.41 (s, 3 H), 2.38 (s, 3 H), 1.34 (t,  $J = 7.0$  Hz, 3 H), 1.03 (t,  $J = 7.2$  Hz, 3 H);  $^{13}\text{C}$  NMR (100 MHz,  $\text{CDCl}_3$ )  $\delta$  192.2, 164.5, 160.4, 139.3, 138.1, 137.2, 133.0, 129.4, 128.2, 126.1, 123.1, 122.0, 119.4, 61.4, 61.2, 21.3, 14.1, 13.6, 13.0; HRMS (ESI)  $m/z$ :  $[\text{M} + \text{H}]^+$  Calcd for  $\text{C}_{19}\text{H}_{22}\text{NO}_5$  344.1492; Found 344.1500.

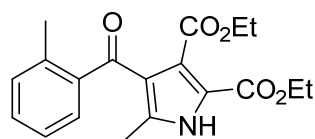

**Diethyl 5-methyl-4-(2-methylbenzoyl)-1H-pyrrole-2,3-dicarboxylate (5f).** Eluent:  $V_{\text{PET}}/V_{\text{EA}} = 5:1$ ; colourless liquid (48.0 mg, 70% yield);  $^1\text{H}$  NMR (400 MHz,  $\text{CDCl}_3$ )  $\delta$  7.28-7.20 (m, 2 H), 7.17-7.08 (m, 2 H), 4.22 (q,  $J = 7.0$  Hz, 2 H), 3.76 (q,  $J = 7.2$  Hz, 2 H), 2.31 (s, 3 H), 2.26 (s, 3 H), 1.23 (t,  $J = 7.0$  Hz, 3 H), 1.10 (t,  $J = 7.0$  Hz, 3 H);  $^{13}\text{C}$  NMR (100 MHz,  $\text{CDCl}_3$ )  $\delta$  192.4, 164.0, 159.5, 138.9, 138.0, 135.4, 129.7, 129.2, 127.0, 124.2, 123.0, 121.0, 117.8, 60.4, 18.7, 13.0, 12.8, 12.2; HRMS (ESI)  $m/z$ :  $[\text{M} + \text{H}]^+$  Calcd for  $\text{C}_{19}\text{H}_{22}\text{NO}_5$  344.1492; Found 344.1505.

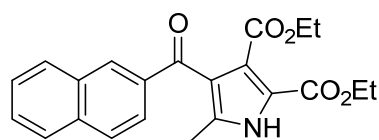

**Diethyl 4-(2-naphthoyl)-5-methyl-1H-pyrrole-2,3-dicarboxylate (5g).** Eluent:  $V_{\text{PET}}/V_{\text{EA}} = 5:1$ ; white solid (56.9 mg, 75% yield); mp 130-132°C;  $^1\text{H}$  NMR (400 MHz,  $\text{CDCl}_3$ )  $\delta$  9.95 (s, 1 H), 8.19 (s, 1 H), 7.94-7.85 (m, 4 H), 7.60-7.50 (m, 2 H), 4.34 (q,  $J = 7.0$  Hz, 2 H), 3.64 (q,  $J = 7.2$  Hz, 2 H), 2.45 (s, 3 H), 1.33 (t,  $J = 7.0$  Hz, 3

H), 0.90 (t,  $J = 7.0$  Hz, 3 H);  $^{13}\text{C}$  NMR (100 MHz,  $\text{CDCl}_3$ )  $\delta$  192.0, 164.6, 160.5, 137.4, 136.6, 135.2, 132.2, 130.6, 129.4, 128.4, 128.2, 127.8, 126.8, 124.7, 123.3, 122.1, 119.4, 61.5, 61.2, 14.1, 13.5, 13.0; HRMS (ESI)  $m/z$ :  $[\text{M} + \text{H}]^+$  Calcd for  $\text{C}_{22}\text{H}_{22}\text{NO}_5$  380.1492; Found 380.1499.

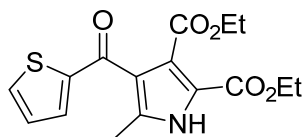

**Diethyl 5-methyl-4-(thiophene-2-carbonyl)-1H-pyrrole-2,3-dicarboxylate (5h).**

Eluent:  $V_{\text{PET}}/V_{\text{EA}} = 5:1$ ; white solid (52.9 mg, 79% yield); mp 122-124°C;  $^1\text{H}$  NMR (400 MHz,  $\text{CDCl}_3$ )  $\delta$  10.30 (s, 1 H), 7.65 (dd,  $J = 4.8, 1.2$  Hz, 1 H), 7.49 (dd,  $J = 3.6, 1.2$  Hz, 1 H), 7.07 (dd,  $J = 4.8, 3.8$  Hz, 1 H), 4.35 (q,  $J = 7.0$  Hz, 2 H), 3.96 (q,  $J = 7.2$  Hz, 2 H), 2.44 (s, 3 H), 1.35 (t,  $J = 7.0$  Hz, 3 H), 1.05 (t,  $J = 7.0$  Hz, 3 H);  $^{13}\text{C}$  NMR (100 MHz,  $\text{CDCl}_3$ )  $\delta$  183.8, 164.3, 160.5, 145.4, 136.2, 133.6, 133.5, 127.7, 122.2, 122.2, 119.8, 61.5, 61.3, 14.1, 13.7, 12.4; HRMS (ESI)  $m/z$ :  $[\text{M} + \text{H}]^+$  Calcd for  $\text{C}_{16}\text{H}_{18}\text{SNO}_5$  336.0900; Found 336.0910.

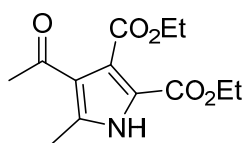

**Diethyl 4-acetyl-5-methyl-1H-pyrrole-2,3-dicarboxylate (5i).** Eluent:  $V_{\text{PET}}/V_{\text{EA}} = 5:1$ ; white solid (32.6 mg, 61% yield); mp 45-47°C;  $^1\text{H}$  NMR (400 MHz,  $\text{CDCl}_3$ )  $\delta$  9.79 (s, 1 H), 4.41 (q,  $J = 7.0$  Hz, 2 H), 4.32 (q,  $J = 7.0$  Hz, 2 H), 2.57 (s, 3 H), 2.39 (s, 3 H), 1.41 (t,  $J = 7.2$  Hz, 3 H), 1.34 (t,  $J = 7.0$  Hz, 3 H);  $^{13}\text{C}$  NMR (100 MHz,  $\text{CDCl}_3$ )  $\delta$  193.2, 166.5, 160.1, 138.1, 123.7, 121.3, 118.3, 61.9, 61.4, 29.3, 14.5, 14.2, 14.1; HRMS (ESI)  $m/z$ :  $[\text{M} + \text{H}]^+$  Calcd for  $\text{C}_{13}\text{H}_{18}\text{NO}_5$  268.1179; Found 268.1185.

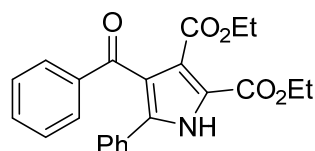

**Diethyl 4-benzoyl-5-phenyl-1H-pyrrole-2,3-dicarboxylate (5j).** Eluent:  $V_{\text{PET}}/V_{\text{EA}} = 8:1$ ; colourless liquid (57.9 mg, 74% yield);  $^1\text{H}$  NMR (400 MHz,  $\text{CDCl}_3$ )  $\delta$  10.42 (s, 1 H), 7.76-7.65 (m, 2 H), 7.43-7.35 (m, 3 H), 7.28-7.26 (m, 2 H), 7.25-7.22 (m, 3 H), 4.20 (q,  $J = 7.0$  Hz, 2 H), 4.03 (q,  $J = 7.0$  Hz, 2 H), 1.28 (t,  $J = 7.0$  Hz, 3 H), 1.12 (t,  $J$



= 7.0 Hz, 3 H);  $^{13}\text{C}$  NMR (100 MHz,  $\text{CDCl}_3$ )  $\delta$  190.7, 163.2, 159.4, 137.0, 136.6, 131.6, 128.8, 128.4, 127.9, 127.5, 127.4, 127.0, 122.6, 121.1, 120.0, 60.6, 60.3, 13.0, 12.7; HRMS (ESI)  $m/z$ :  $[\text{M} + \text{H}]^+$  Calcd for  $\text{C}_{23}\text{H}_{22}\text{NO}_5$  392.1492; Found 392.1502.

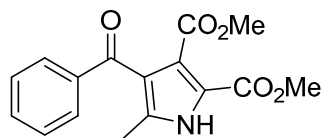

**Dimethyl 4-benzoyl-5-methyl-1H-pyrrole-2,3-dicarboxylate (5k).** Eluent:  $V_{\text{PET}}/V_{\text{EA}} = 3:1$ ; white solid (43.4 mg, 72% yield); mp 114-116°C;  $^1\text{H}$  NMR (400 MHz,  $\text{CDCl}_3$ )  $\delta$  10.06 (s, 1 H), 7.71 (d,  $J = 7.0$  Hz, 2 H), 7.53 (t,  $J = 7.4$  Hz, 1 H), 7.43 (t,  $J = 7.4$  Hz, 2 H), 3.87 (s, 3 H), 3.34 (s, 3 H), 2.41 (s, 3 H);  $^{13}\text{C}$  NMR (100 MHz,  $\text{CDCl}_3$ )  $\delta$  192.0, 164.7, 160.7, 139.4, 137.3, 132.3, 128.7, 128.3, 122.8, 122.2, 119.4, 52.3, 51.9, 12.8; HRMS (ESI)  $m/z$ :  $[\text{M} + \text{H}]^+$  Calcd for  $\text{C}_{16}\text{H}_{16}\text{NO}_5$  302.1023; Found 302.1028.

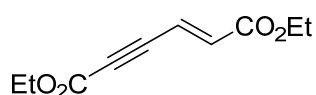

**Diethyl (E)-hex-2-en-4-ynoate (6).**<sup>2</sup> Colorless liquid;  $^1\text{H}$  NMR (400 MHz,  $\text{CDCl}_3$ )  $\delta$  6.78 (d,  $J = 16.0$  Hz, 1H), 6.46 (d,  $J = 16.0$  Hz, 1H), 4.35-4.18 (m, 4H), 1.36-1.29 (m, 6H);  $^{13}\text{C}$  NMR (100 MHz,  $\text{CDCl}_3$ )  $\delta$  164.7, 153.1, 135.4, 121.5, 87.0, 81.5, 62.4, 61.3, 14.1, 14.0.

## References

- (a) X. Sun, Y. Lyu, D. Zhang-Negrerie, Y. Du and K. Zhao, *Org. Lett.*, 2013, **15**, 6222. (b) B. Prek, U. Groselj, M. Kasunic, S. Zupancic, J. Svete and B. Stanovnik, *Aust. J. Chem.*, 2015, **68**, 184.
- S. Chen, Y. Li, J. Zhao and X. Li, *Inorg. Chem.*, 2009, **48**, 1198.

# The $^1\text{H}$ and $^{13}\text{C}$ NMR spectra of all products

flq-196.1.fid

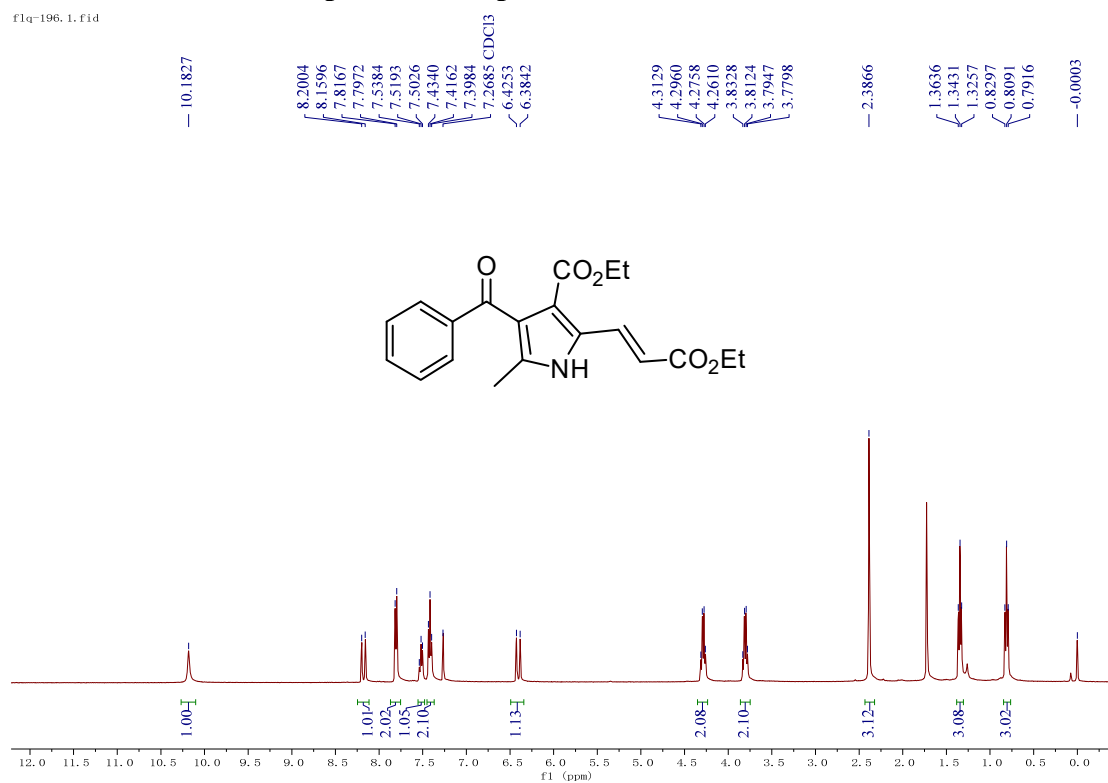

$^1\text{H}$  NMR spectrum of **3a** (400 MHz, CDCl<sub>3</sub>)

flq-231.2.fid

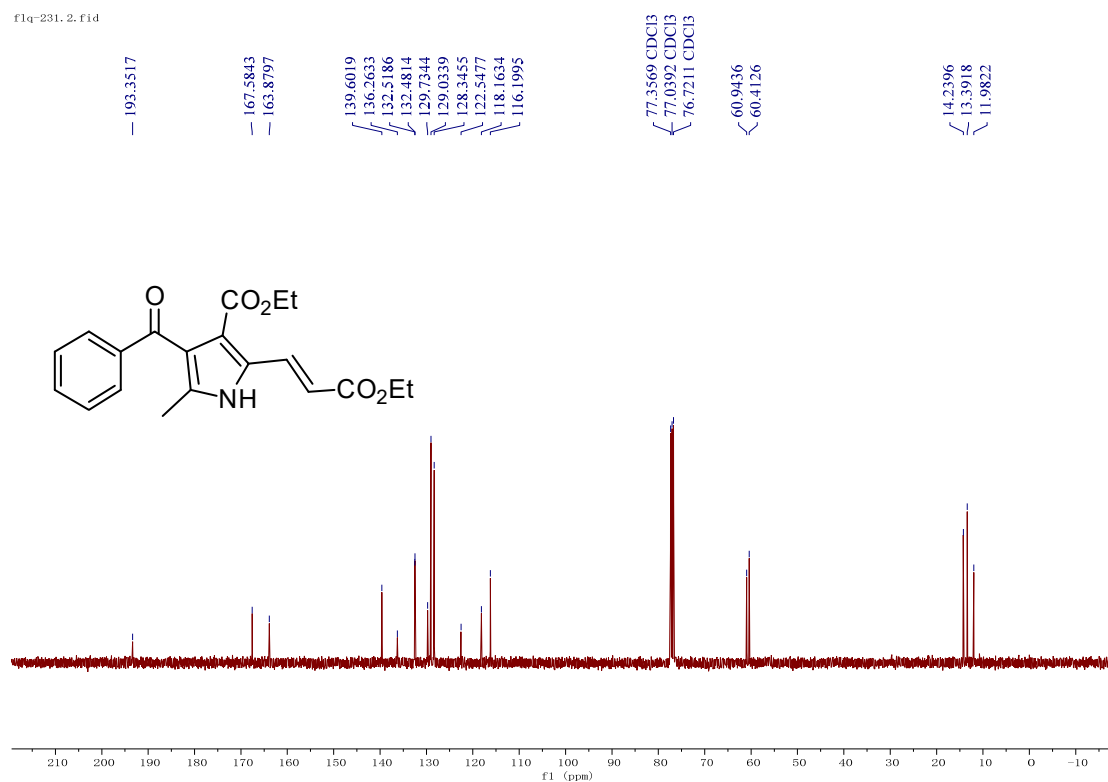

$^{13}\text{C}$  NMR spectrum of **3a** (100 MHz, CDCl<sub>3</sub>)

f1q-331. 1. fid

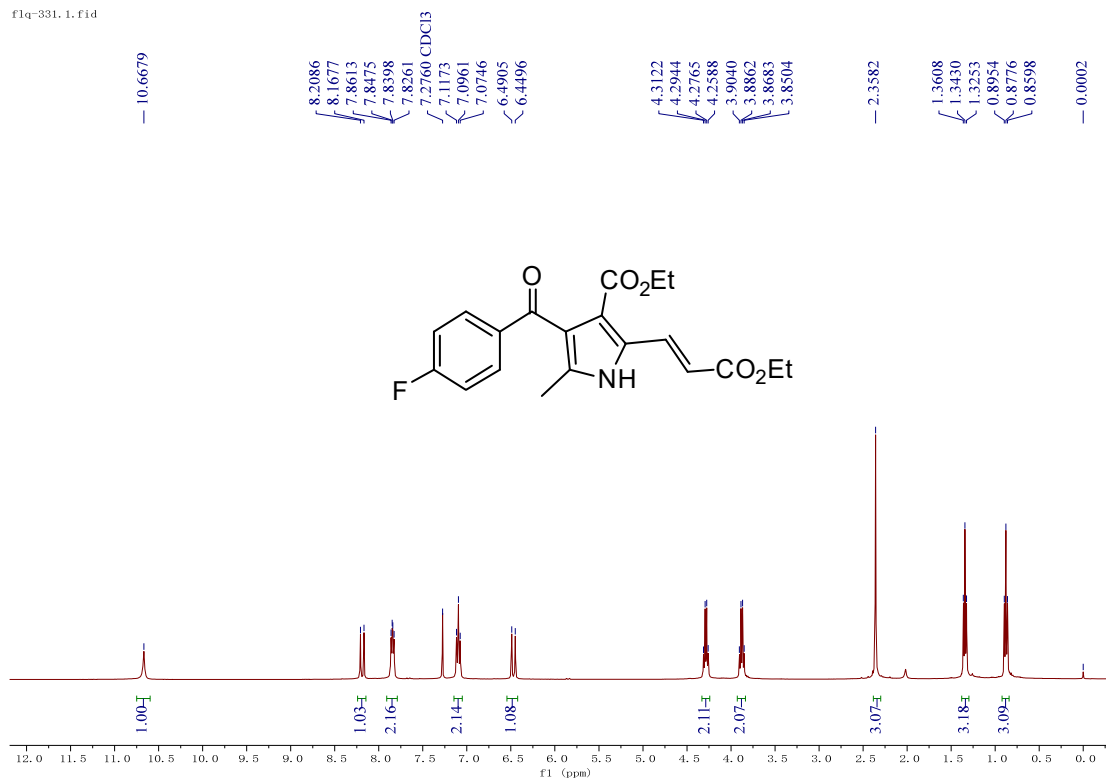

<sup>1</sup>H NMR spectrum of **3b** (400 MHz, CDCl<sub>3</sub>)

f1q-331-c. 1. fid

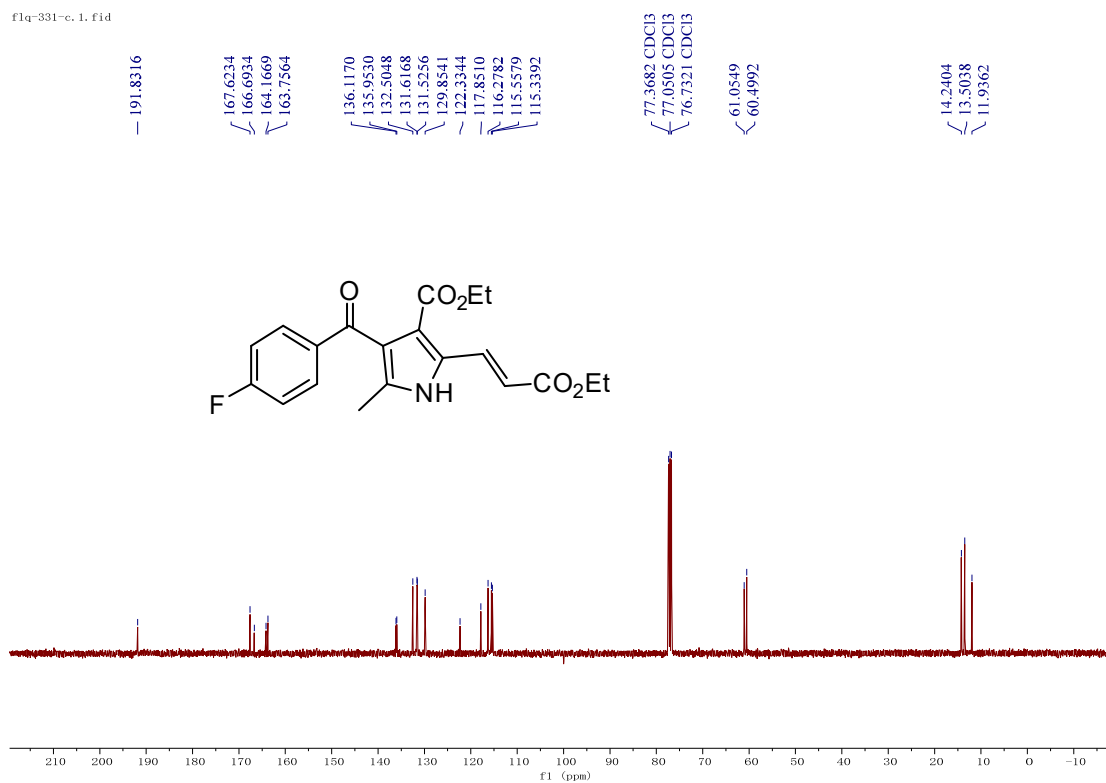

<sup>13</sup>C NMR spectrum of **3b** (100 MHz, CDCl<sub>3</sub>)

f1q-330. 1. fid

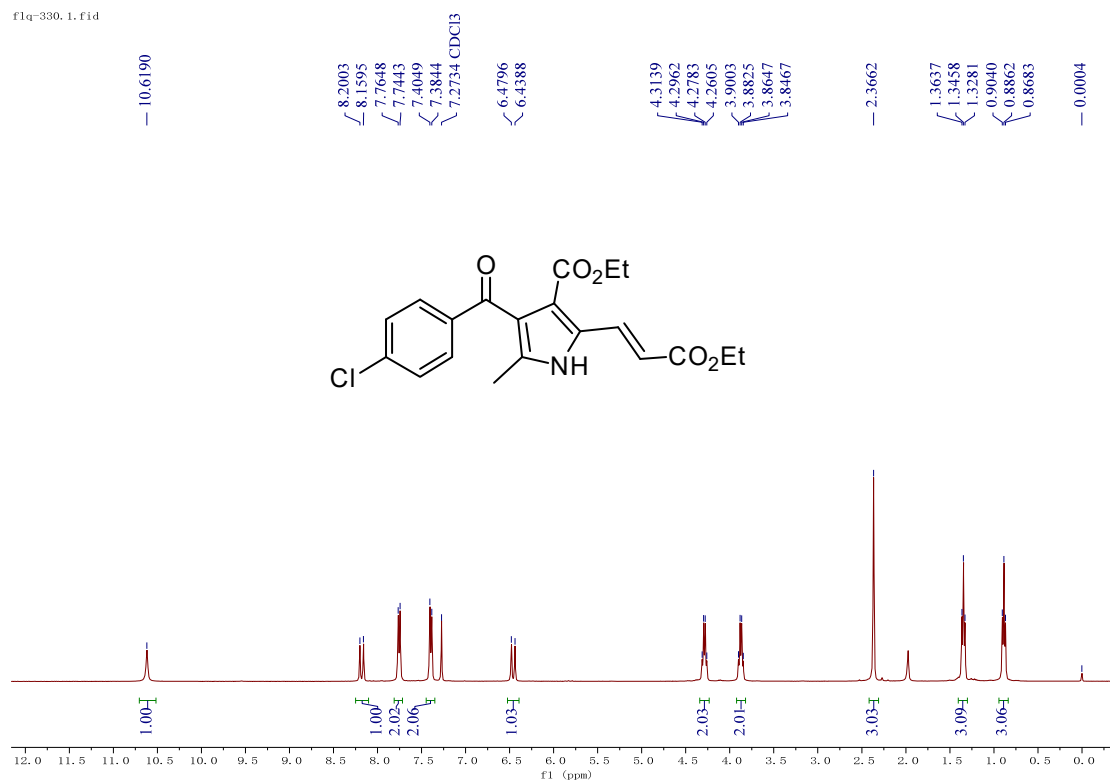

<sup>1</sup>H NMR spectrum of 3c (400 MHz, CDCl<sub>3</sub>)

f1q-330-c. 1. fid

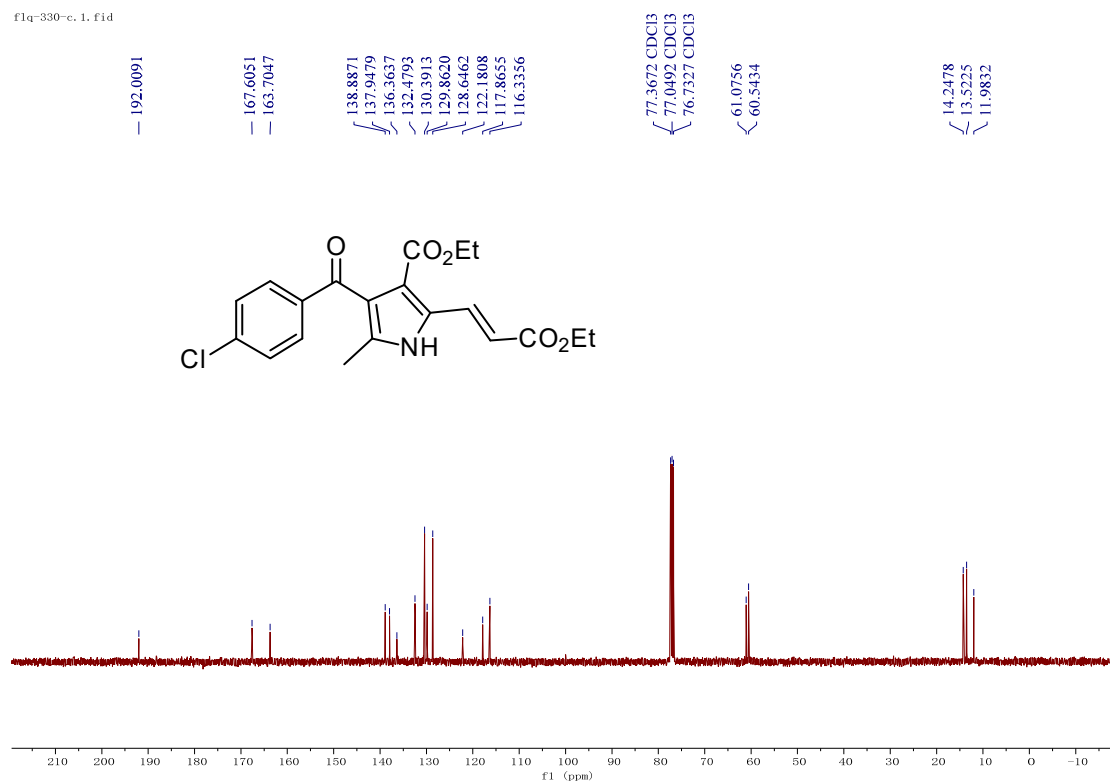

<sup>13</sup>C NMR spectrum of 3c (100 MHz, CDCl<sub>3</sub>)

f1q-332. 1. fid

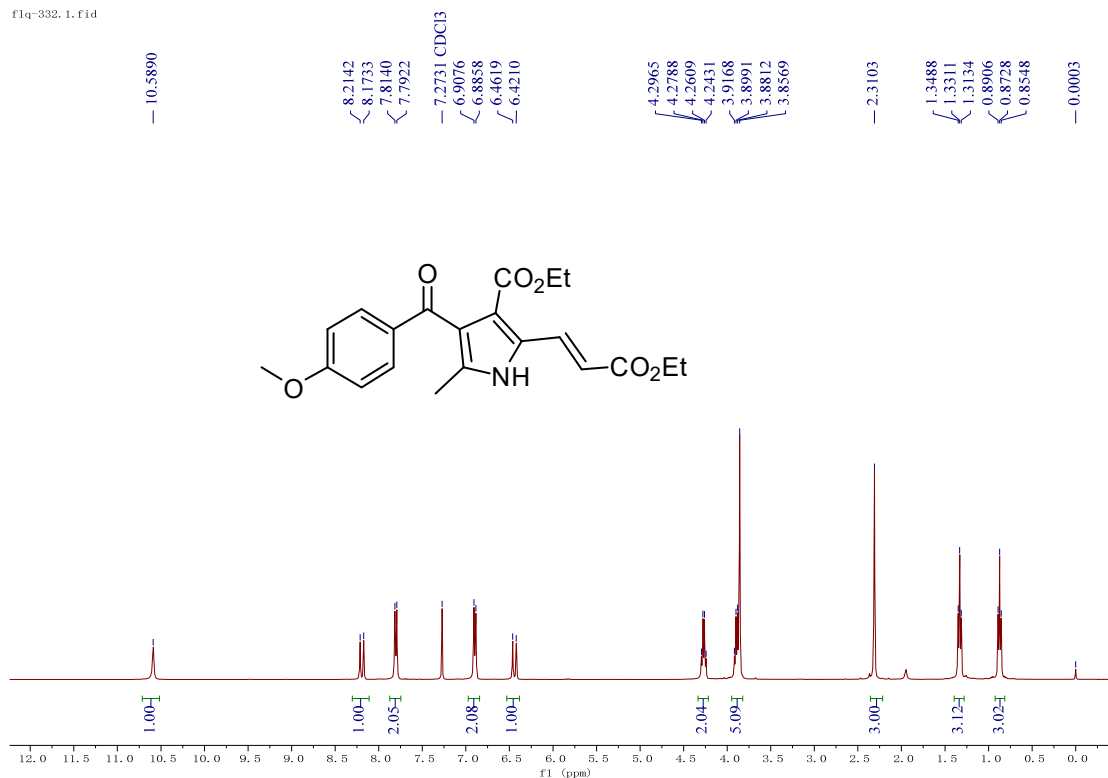

<sup>1</sup>H NMR spectrum of **3d** (400 MHz, CDCl<sub>3</sub>)

f1q-332-c. 1. fid

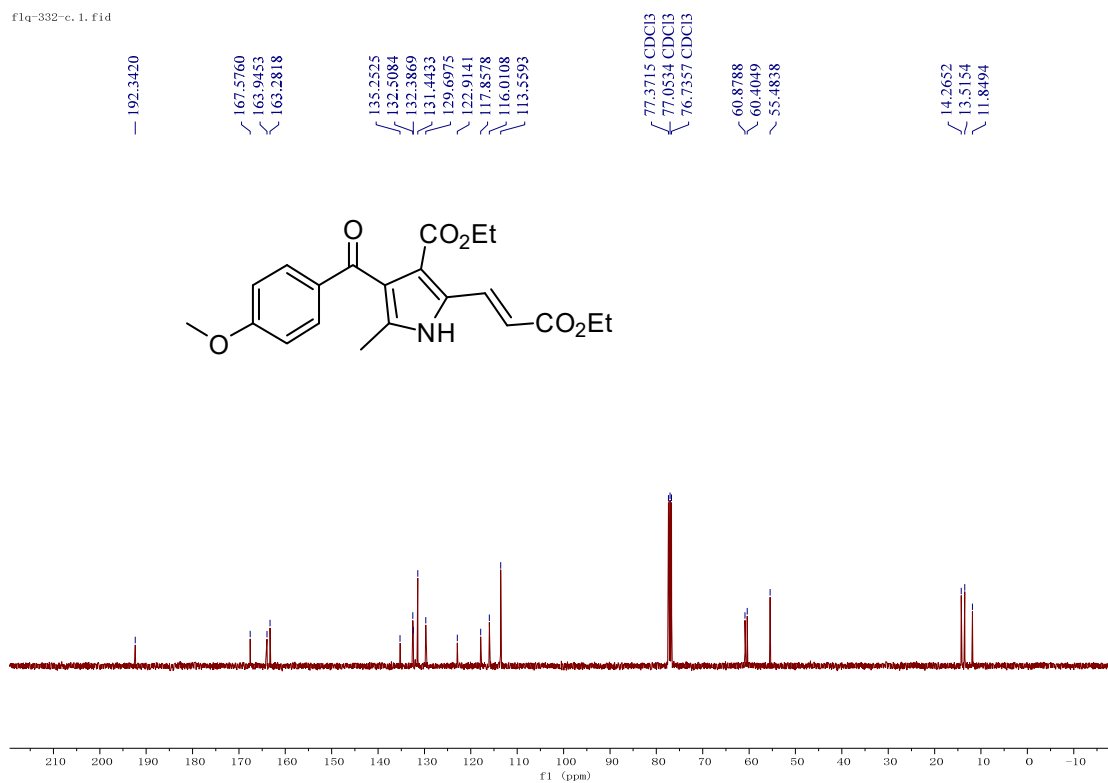

<sup>13</sup>C NMR spectrum of **3d** (100 MHz, CDCl<sub>3</sub>)

f1q-333.1.fid

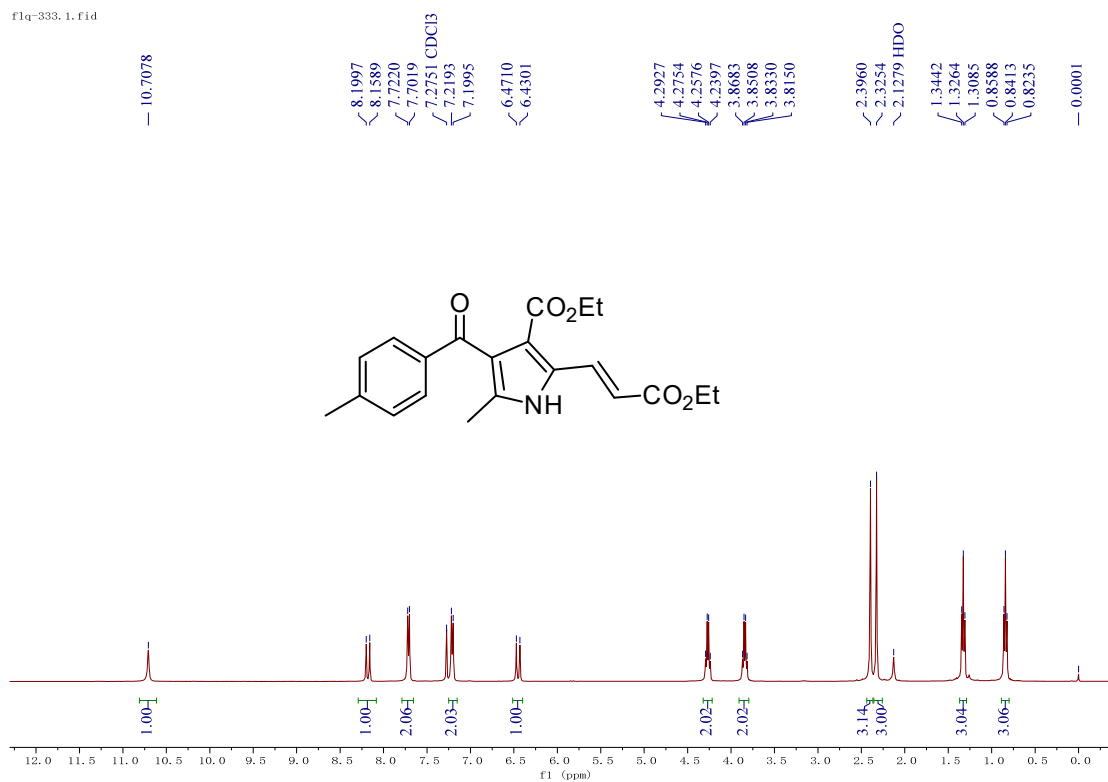

<sup>1</sup>H NMR spectrum of **3e** (400 MHz, CDCl<sub>3</sub>)

f1q-333-c.1.fid

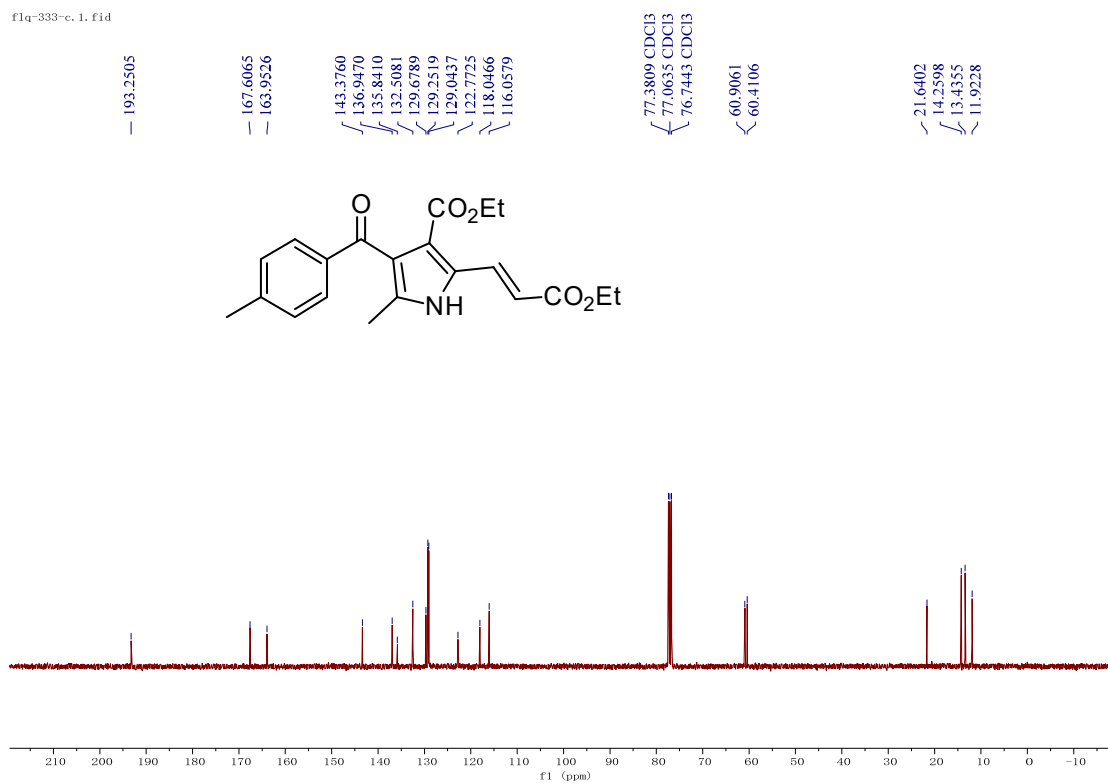

<sup>13</sup>C NMR spectrum of **3e** (100 MHz, CDCl<sub>3</sub>)

f1q-355. 1. fid

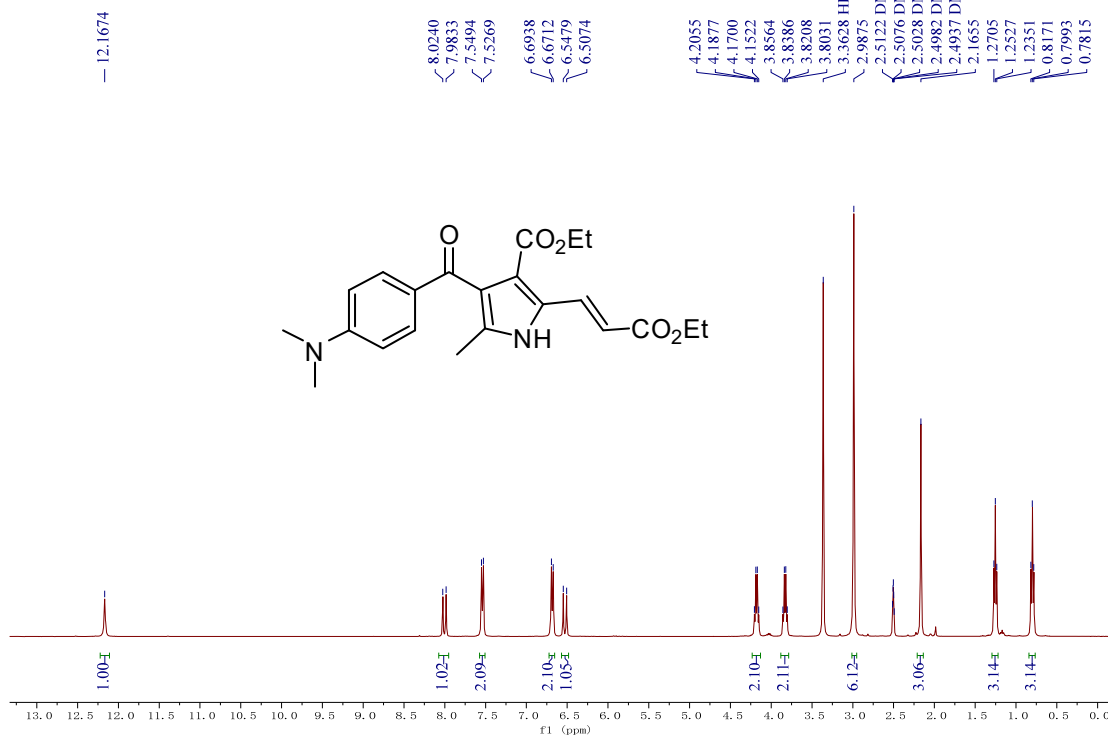

<sup>1</sup>H NMR spectrum of **3f** (400 MHz, DMSO-*d*<sub>6</sub>)

f1q-355-c. 1. fid

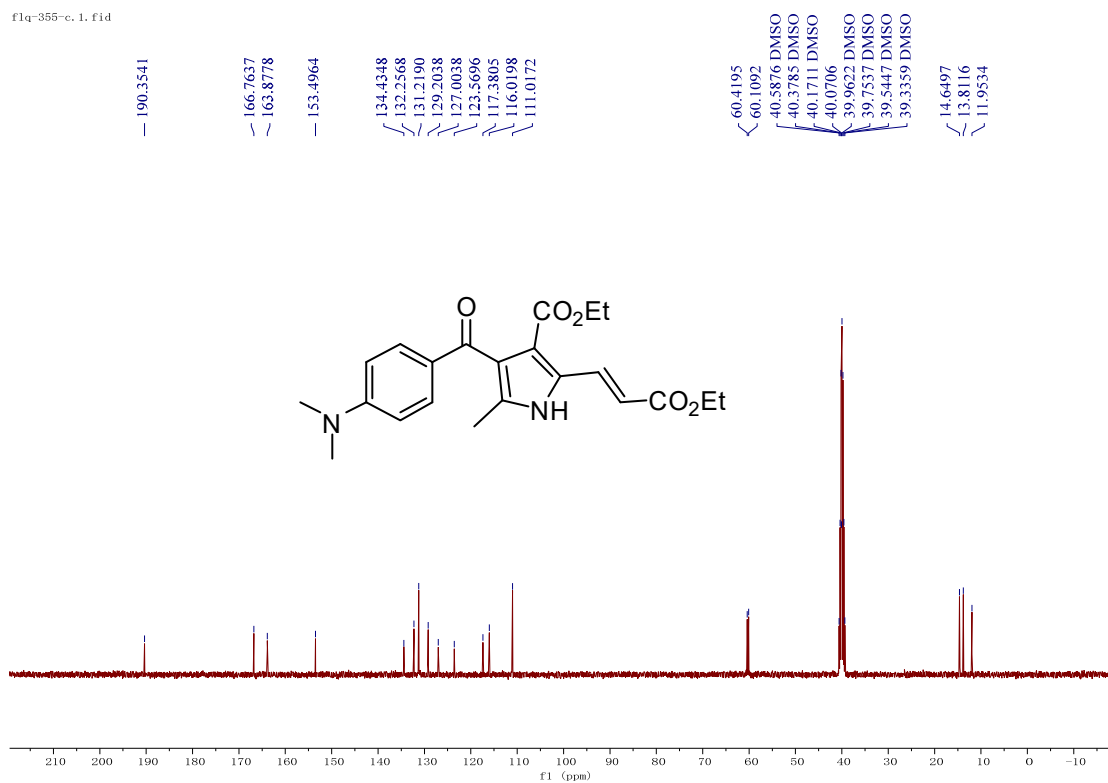

<sup>13</sup>C NMR spectrum of **3f** (100 MHz, DMSO-*d*<sub>6</sub>)

f1q-339.1.fid

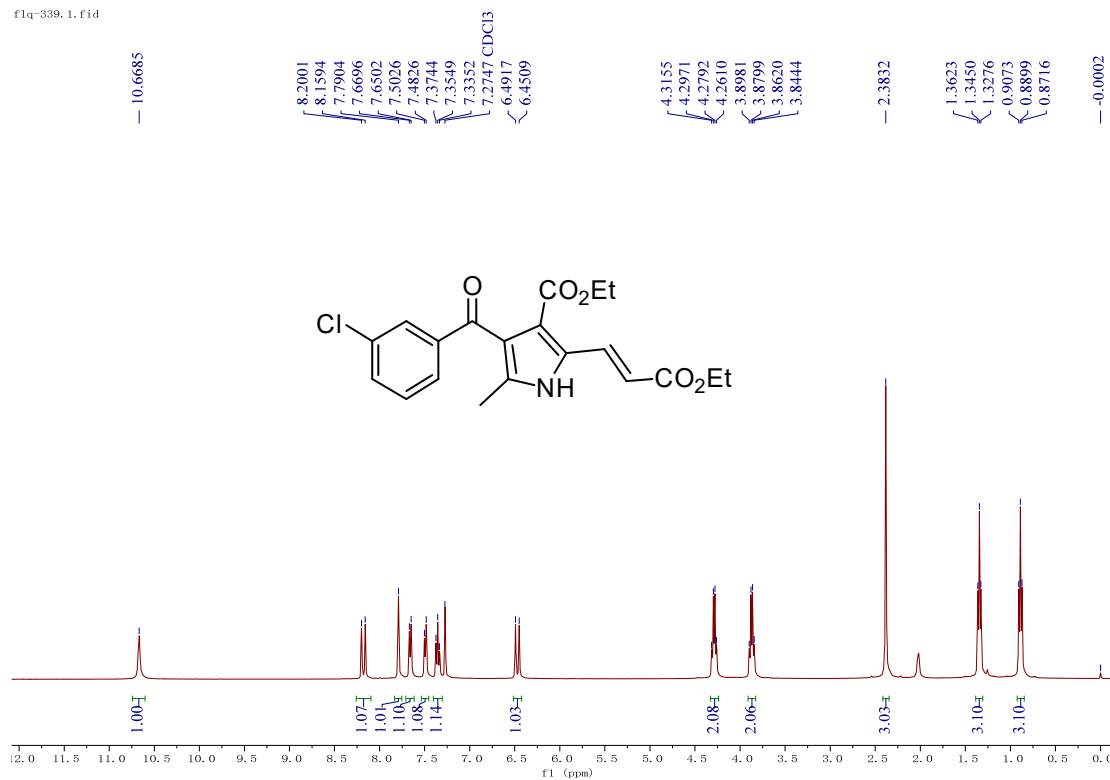

<sup>1</sup>H NMR spectrum of **3g** (400 MHz, CDCl<sub>3</sub>)

f1q-339-c.1.fid

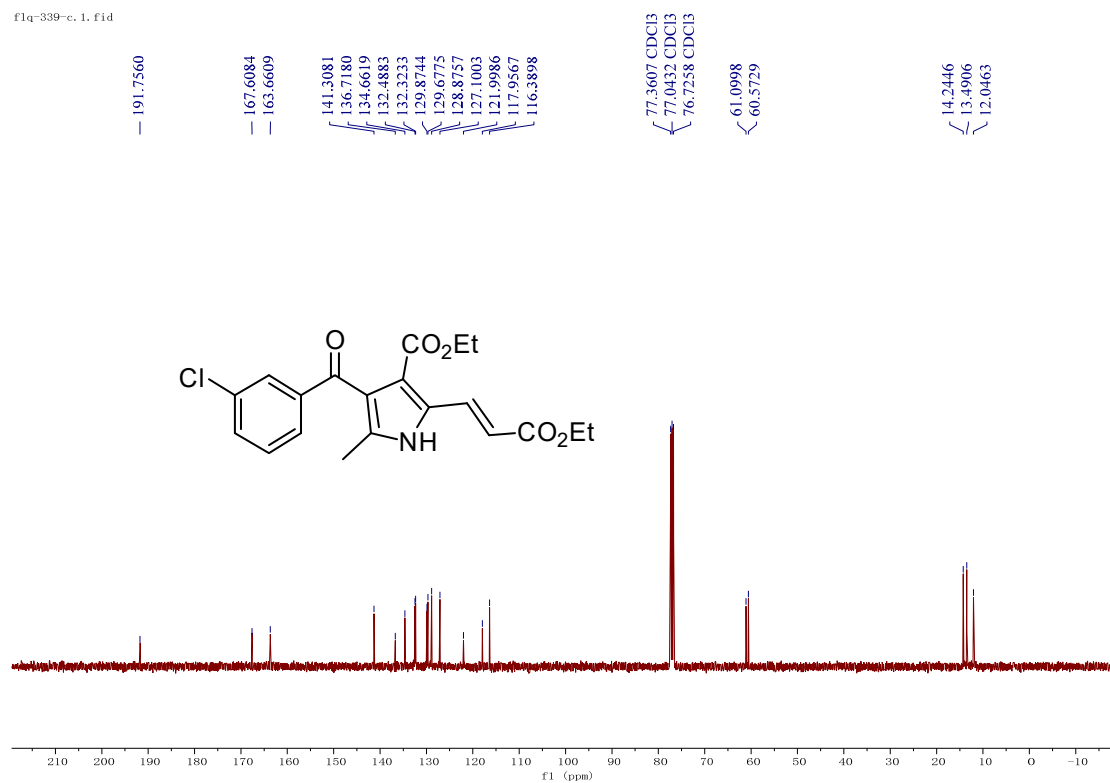

<sup>13</sup>C NMR spectrum of **3g** (100 MHz, CDCl<sub>3</sub>)



f1q-340. 1. fid

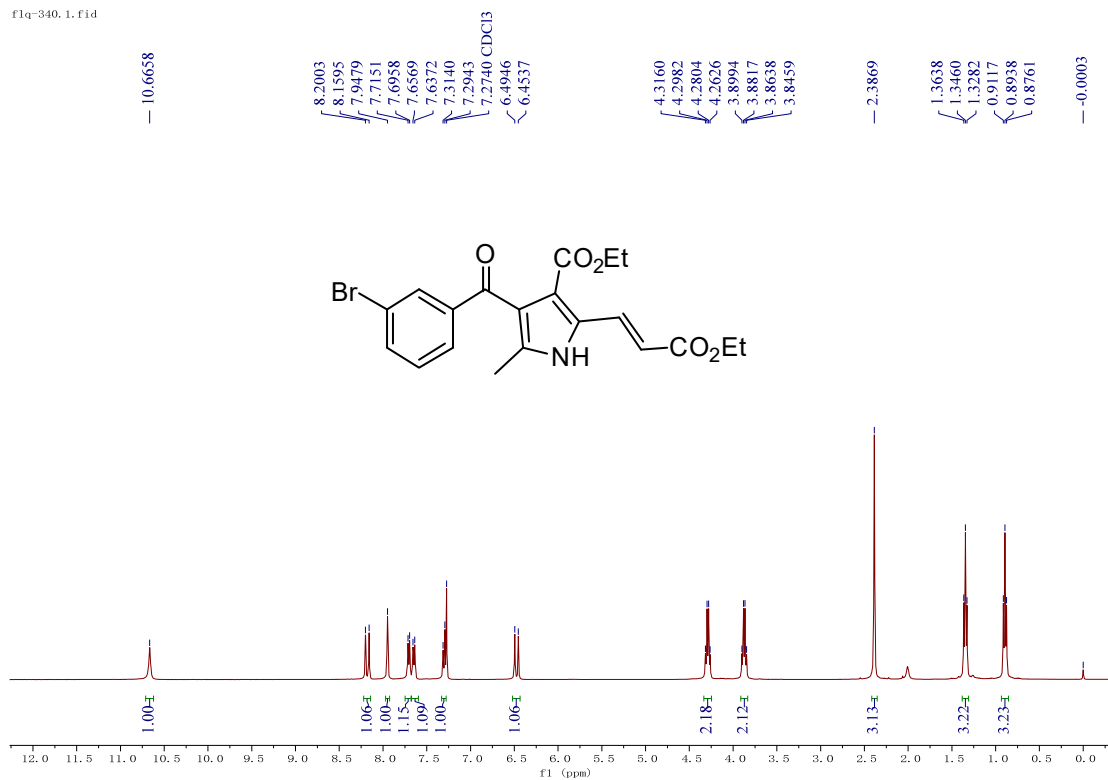

<sup>1</sup>H NMR spectrum of **3h** (400 MHz, CDCl<sub>3</sub>)

f1q-340-c. 1. fid

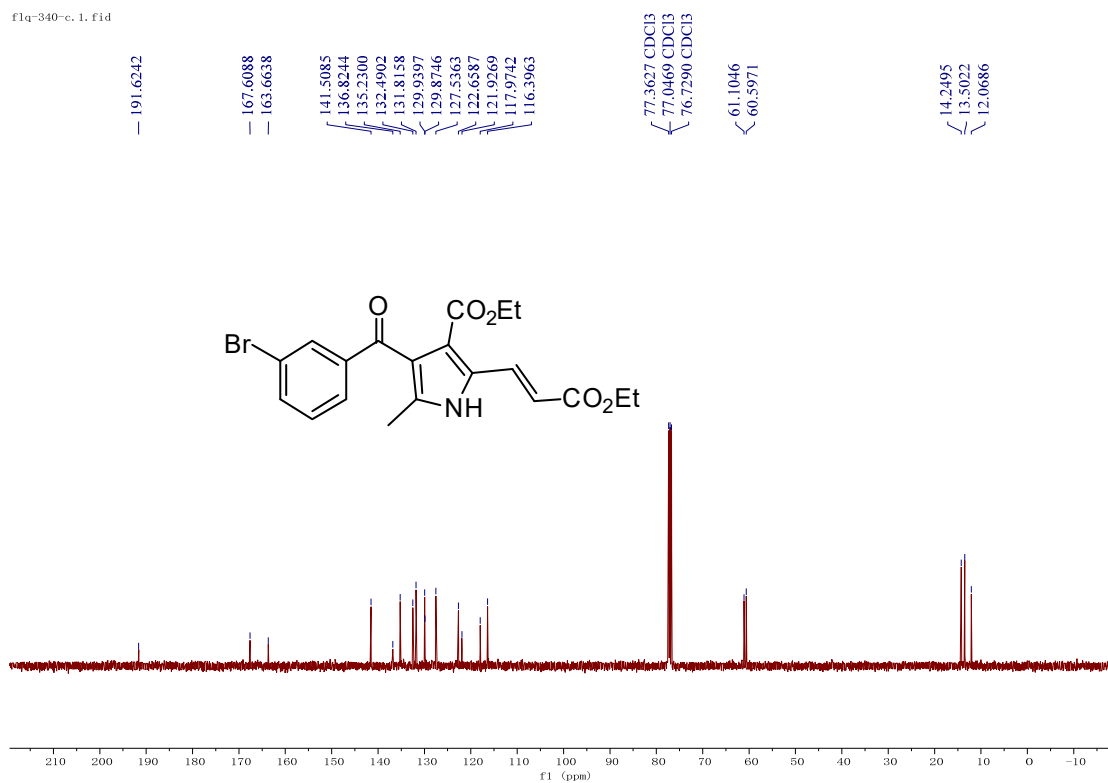

<sup>13</sup>C NMR spectrum of **3h** (100 MHz, CDCl<sub>3</sub>)

f1q-324. 1. fid

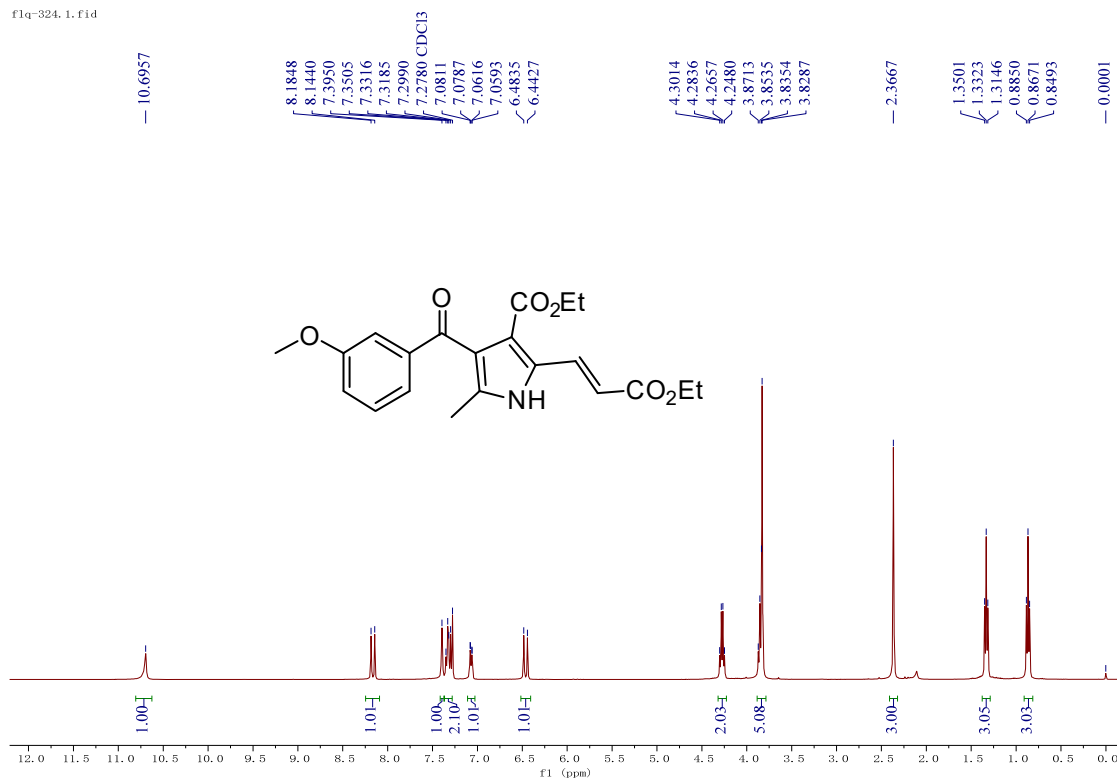

<sup>1</sup>H NMR spectrum of **3i** (400 MHz, CDCl<sub>3</sub>)

f1q-334-c. 1. fid

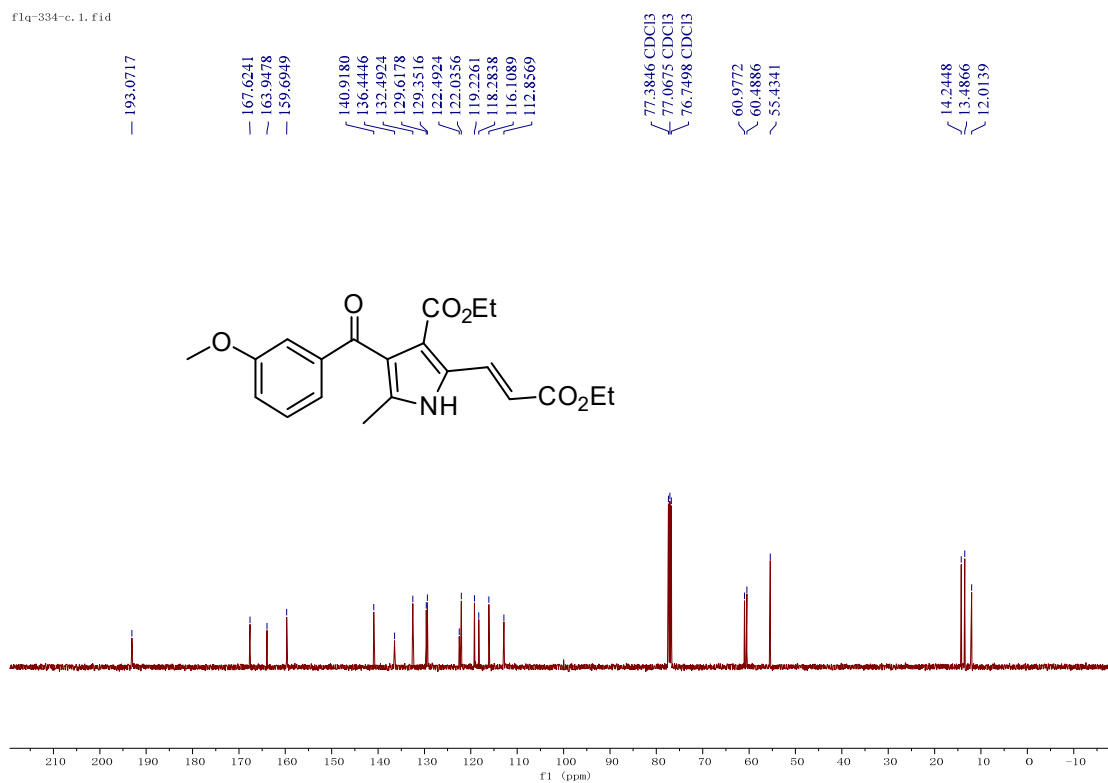

<sup>13</sup>C NMR spectrum of **3i** (100 MHz, CDCl<sub>3</sub>)

f1q-325. 1. fid

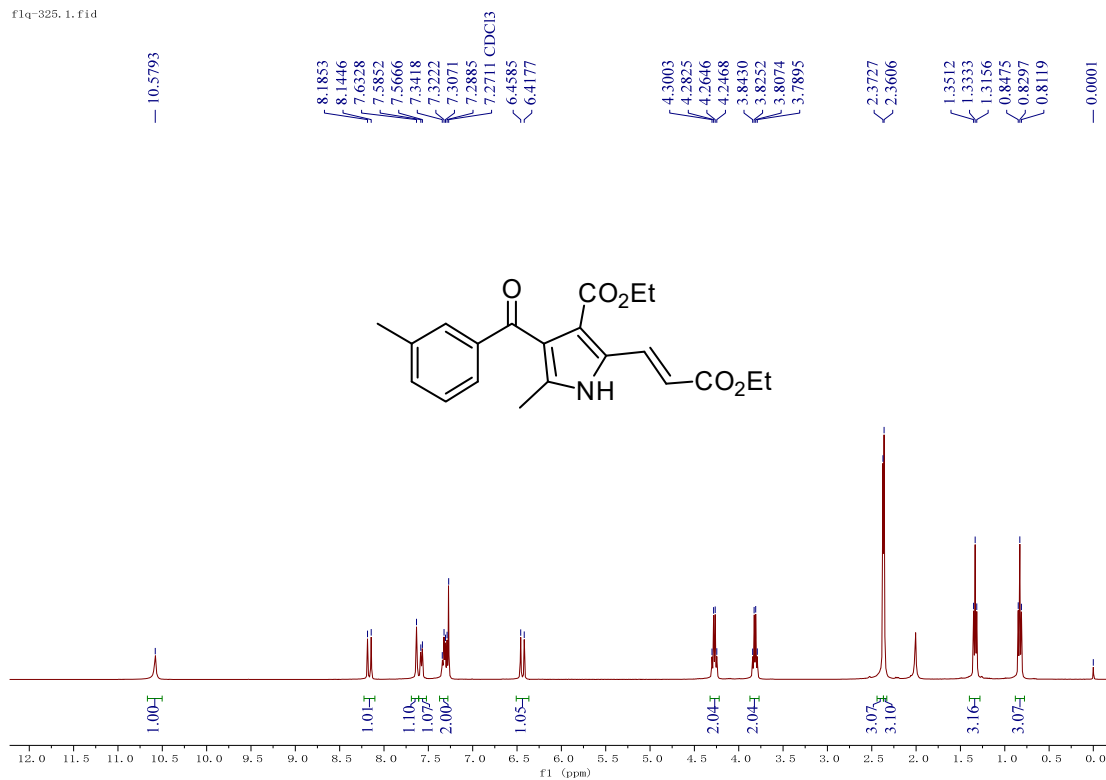

<sup>1</sup>H NMR spectrum of **3j** (400 MHz, CDCl<sub>3</sub>)

f1q-335-c. 1. fid

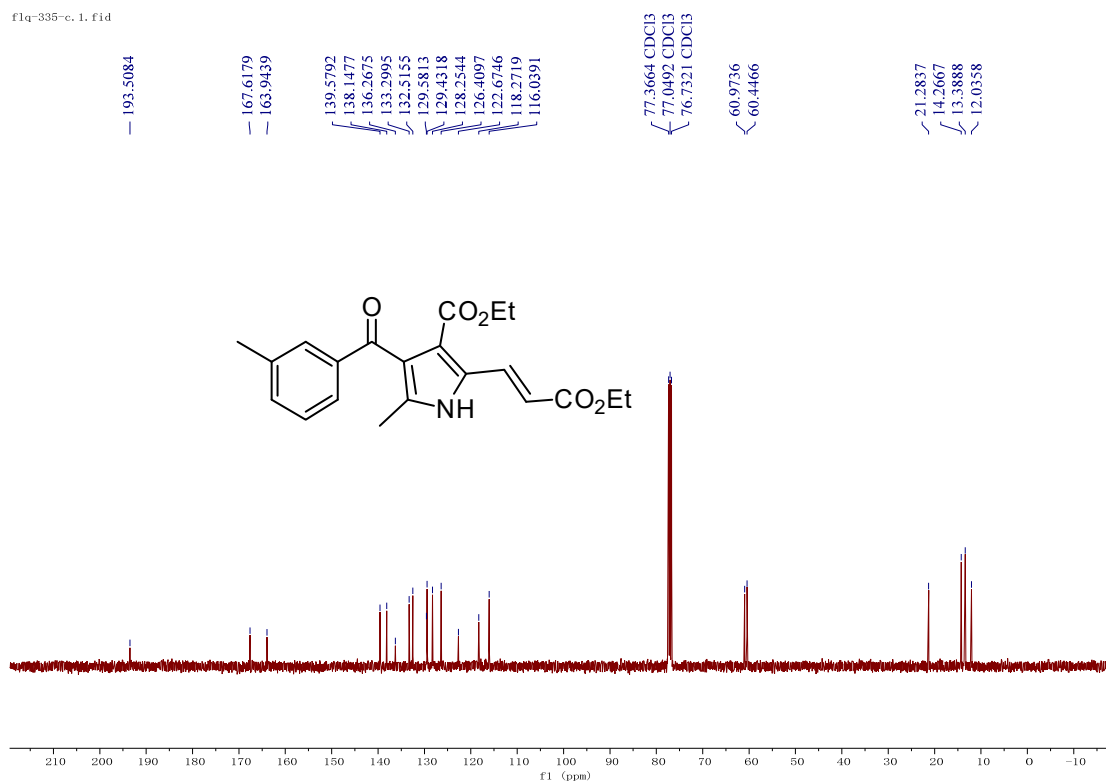

<sup>13</sup>C NMR spectrum of **3j** (100 MHz, CDCl<sub>3</sub>)

f1q-326.1.fid

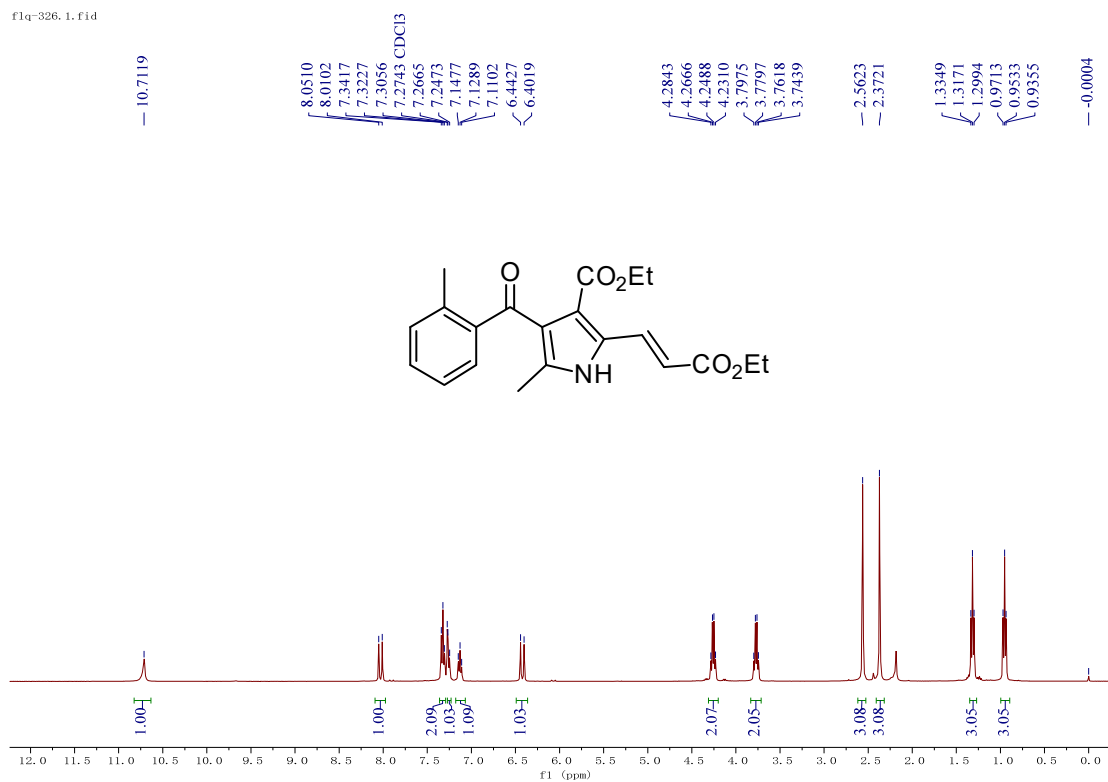

<sup>1</sup>H NMR spectrum of **3k** (400 MHz, CDCl<sub>3</sub>)

f1q-336-c.1.fid

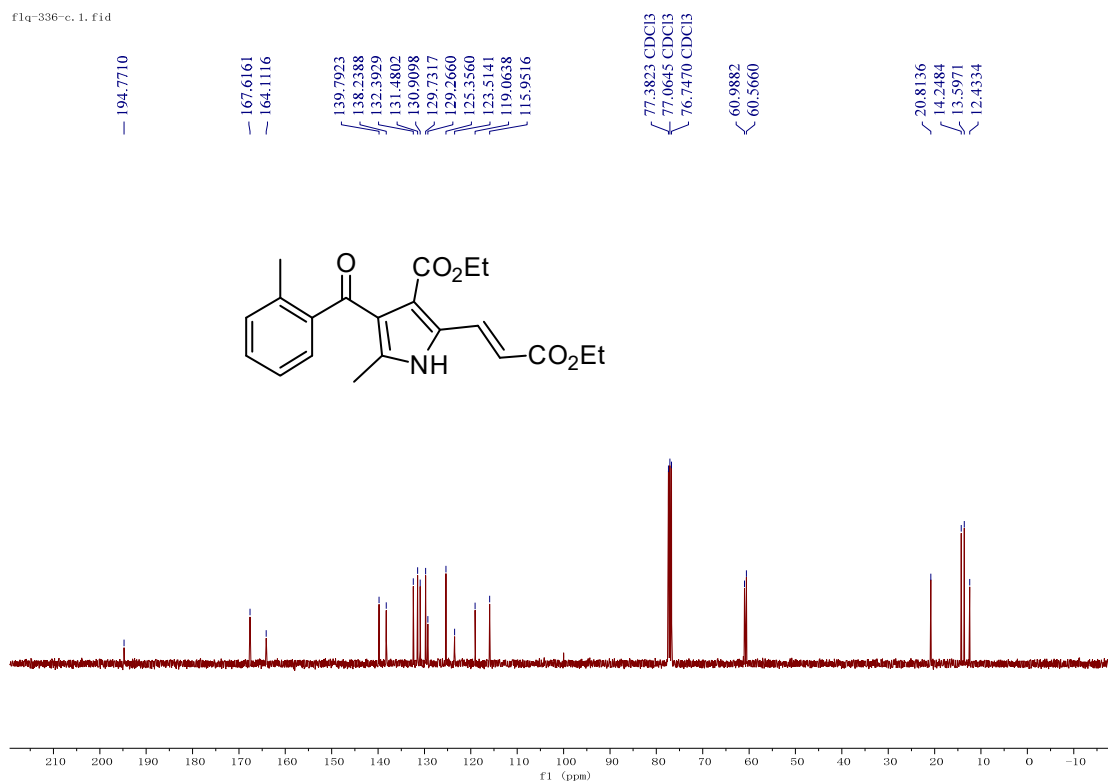

<sup>13</sup>C NMR spectrum of **3k** (100 MHz, CDCl<sub>3</sub>)

flq-344. 1. fid

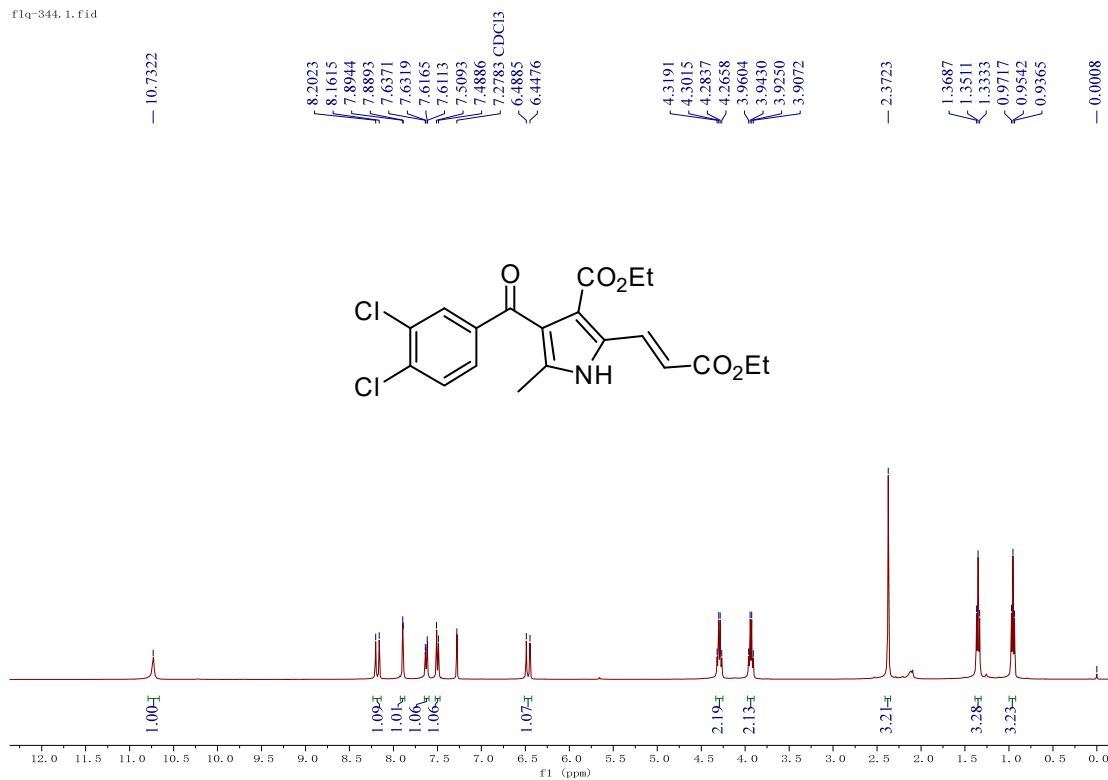

<sup>1</sup>H NMR spectrum of **3I** (400 MHz, CDCl<sub>3</sub>)

flq-344-c. 1. fid

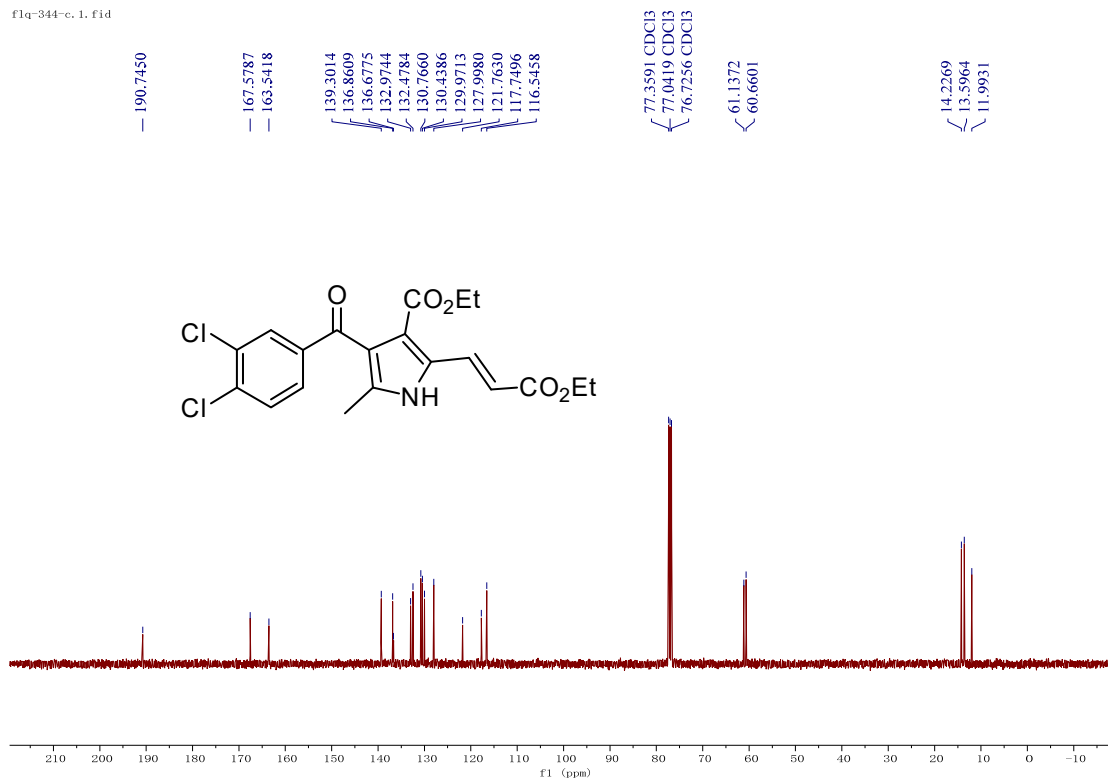

<sup>13</sup>C NMR spectrum of **3I** (100 MHz, CDCl<sub>3</sub>)

f1q-341. 1. fid

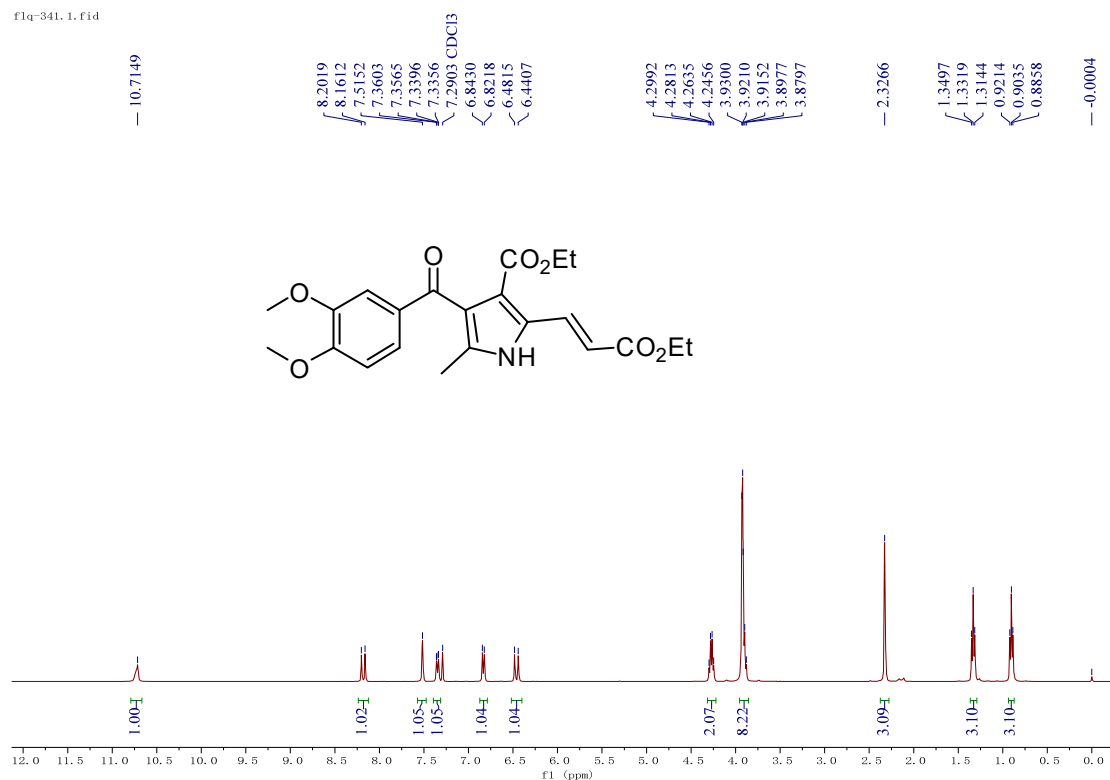

<sup>1</sup>H NMR spectrum of **3m** (400 MHz, CDCl<sub>3</sub>)

f1q-341-c. 1. fid

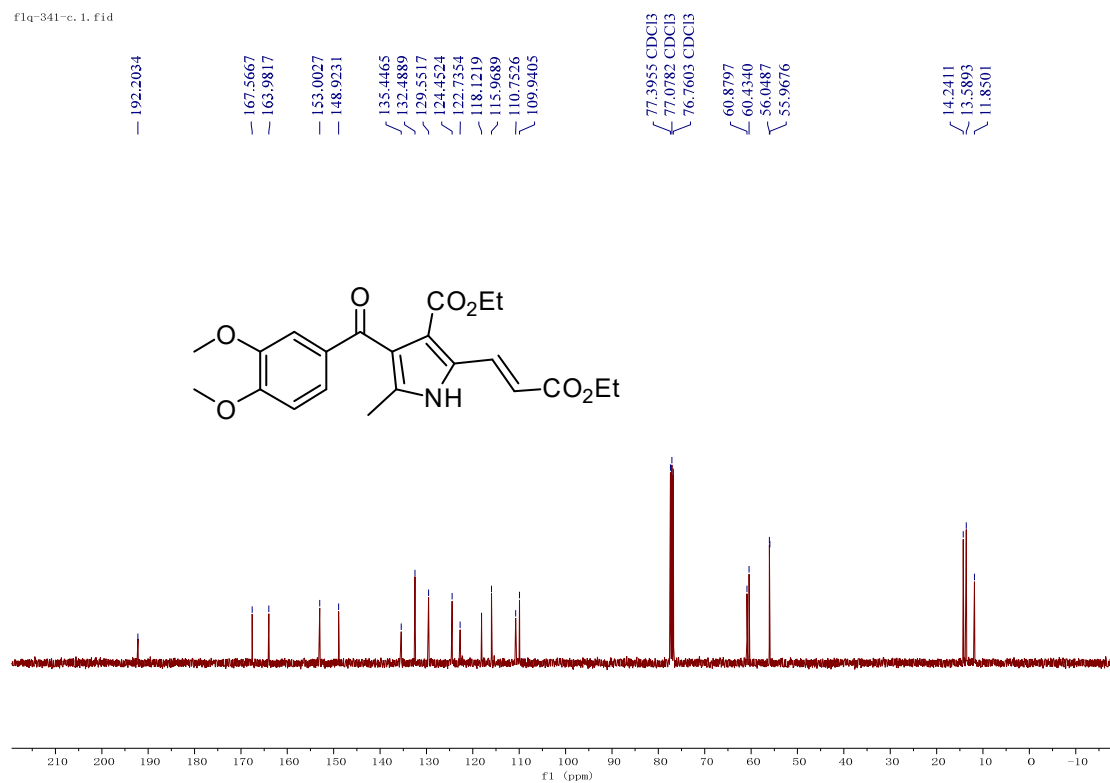

<sup>13</sup>C NMR spectrum of **3m** (100 MHz, CDCl<sub>3</sub>)

f1q-343. 1. fid

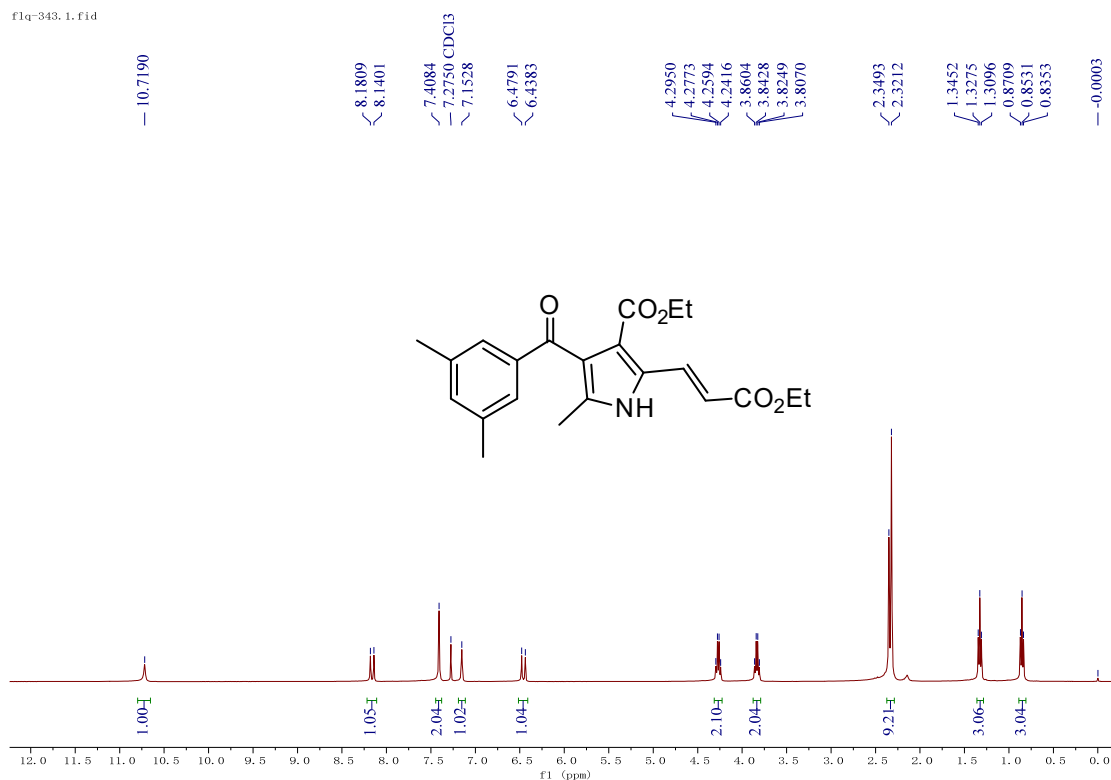

<sup>1</sup>H NMR spectrum of **3n** (400 MHz, CDCl<sub>3</sub>)

f1q-343-c. 1. fid

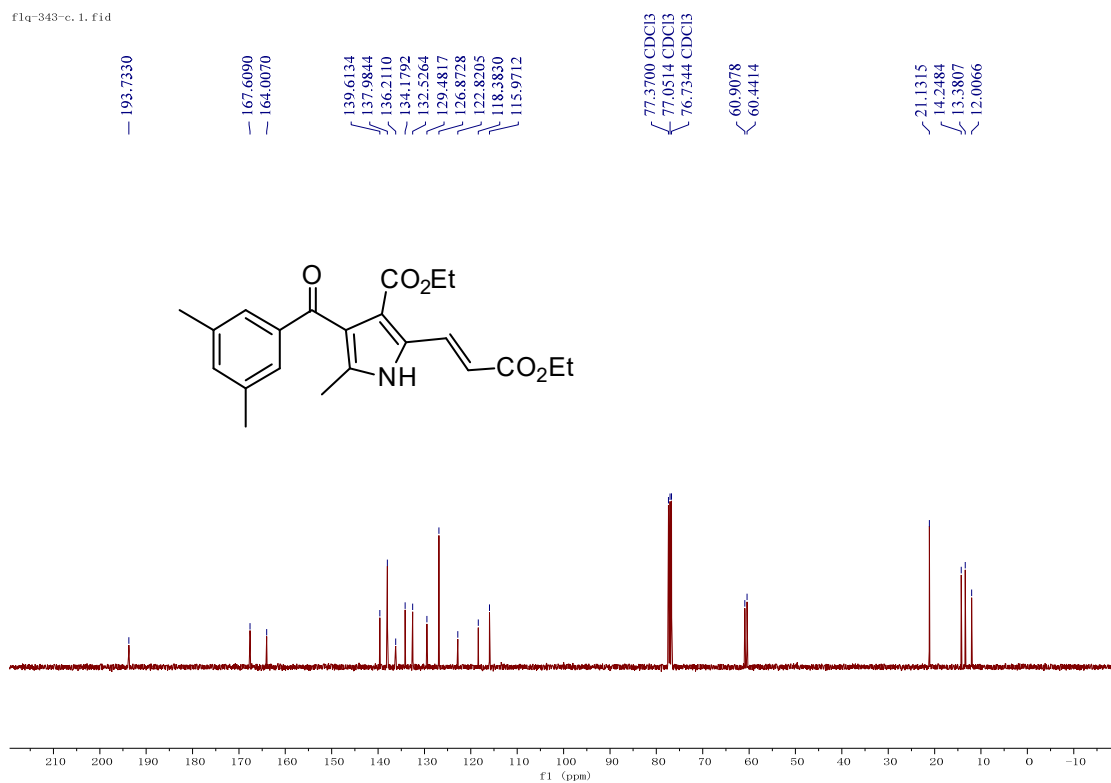

<sup>13</sup>C NMR spectrum of **3n** (100 MHz, CDCl<sub>3</sub>)

f1q-354. 1. fid

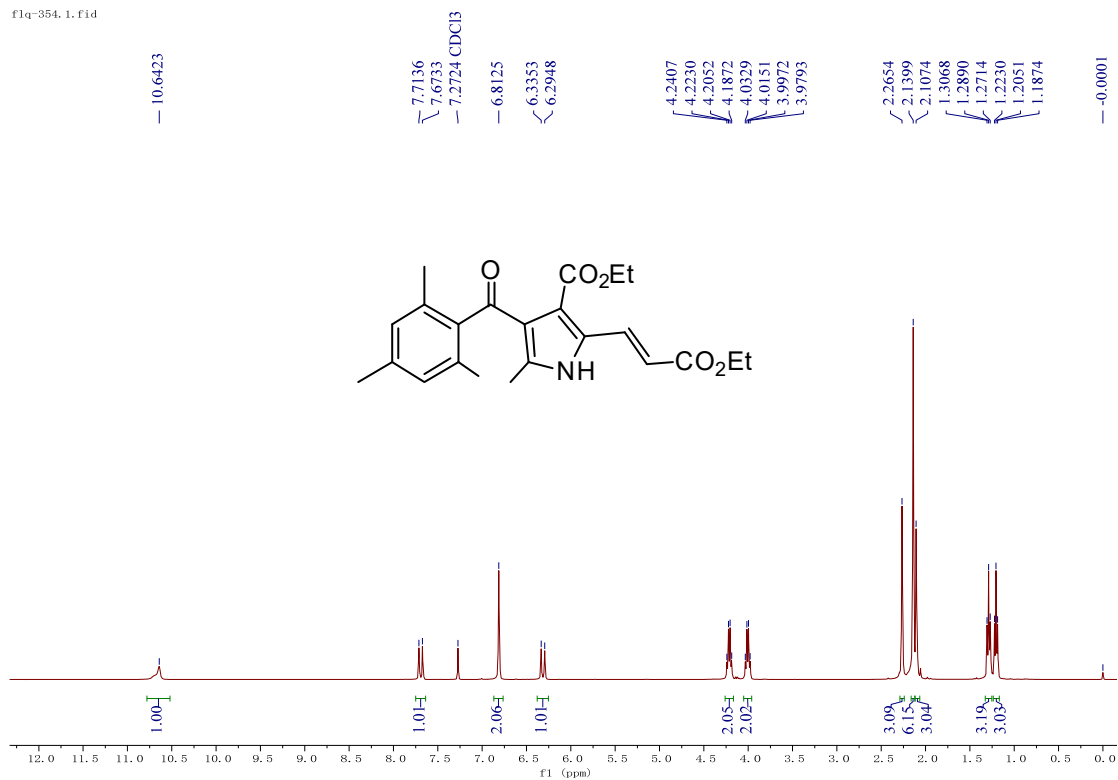

<sup>1</sup>H NMR spectrum of **3o** (400 MHz, CDCl<sub>3</sub>)

f1q-354-c. 1. fid

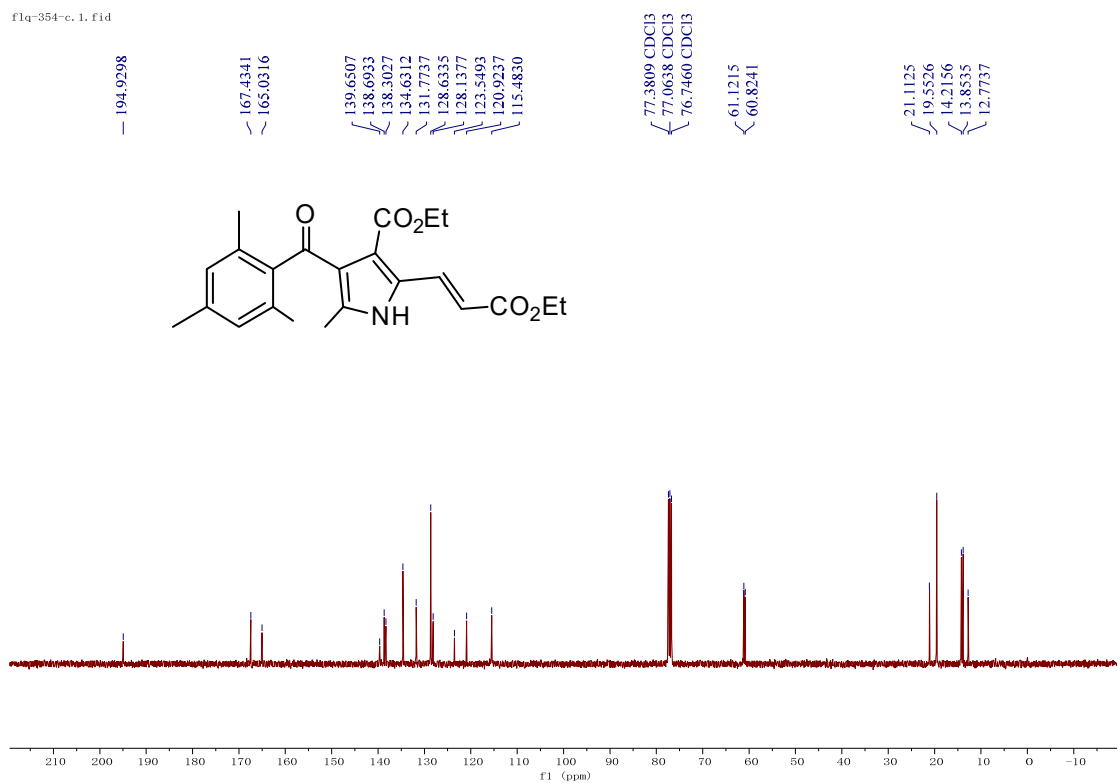

<sup>13</sup>C NMR spectrum of **3o** (100 MHz, CDCl<sub>3</sub>)



f1q-342. 1. fid

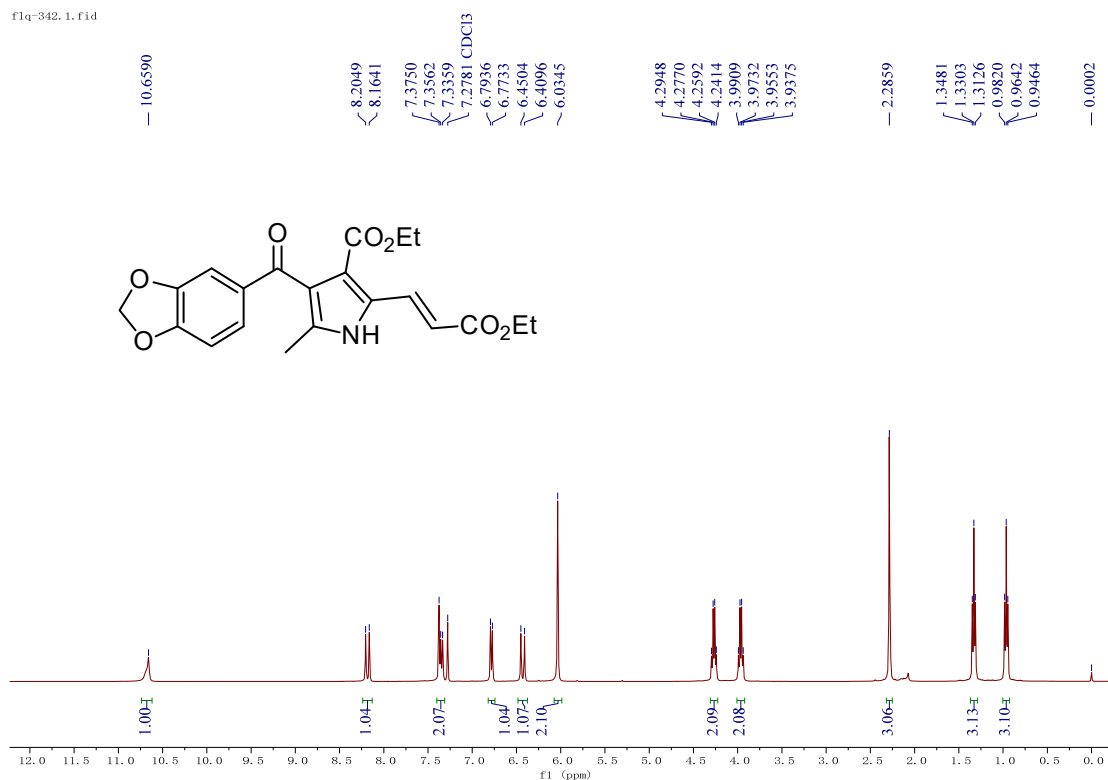

<sup>1</sup>H NMR spectrum of **3p** (400 MHz, CDCl<sub>3</sub>)

f1q-342-c. 1. fid

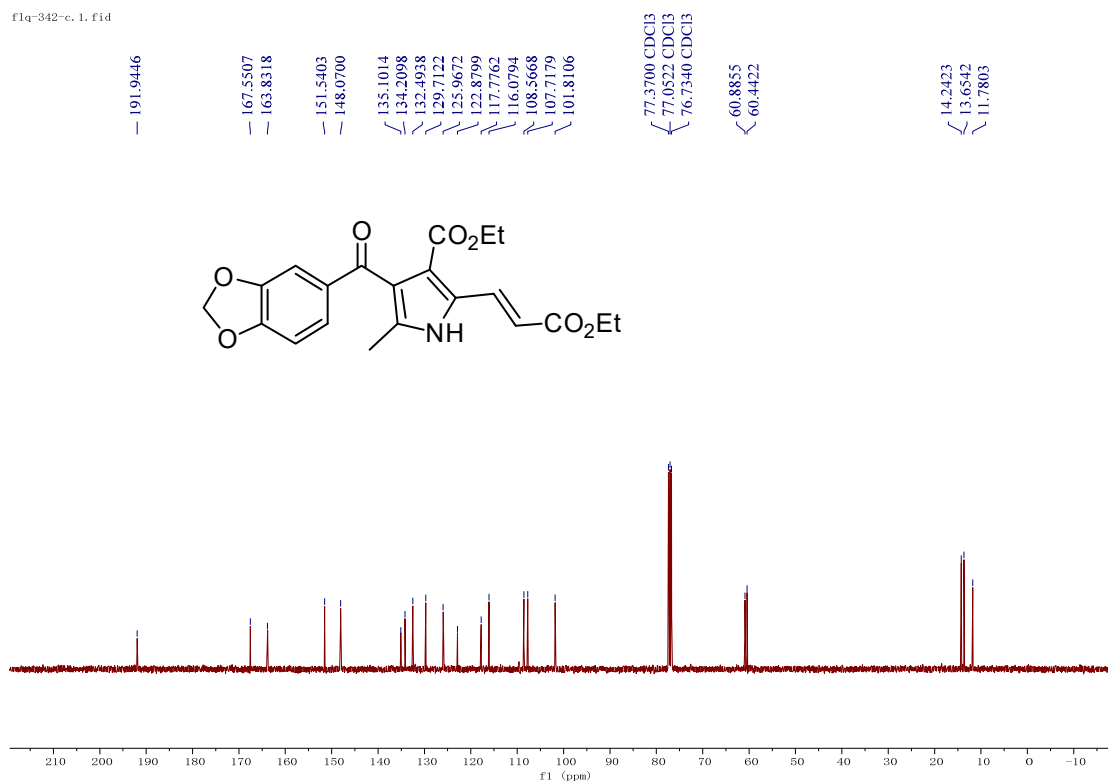

<sup>13</sup>C NMR spectrum of **3p** (100 MHz, CDCl<sub>3</sub>)

f1q-337. 1. fid

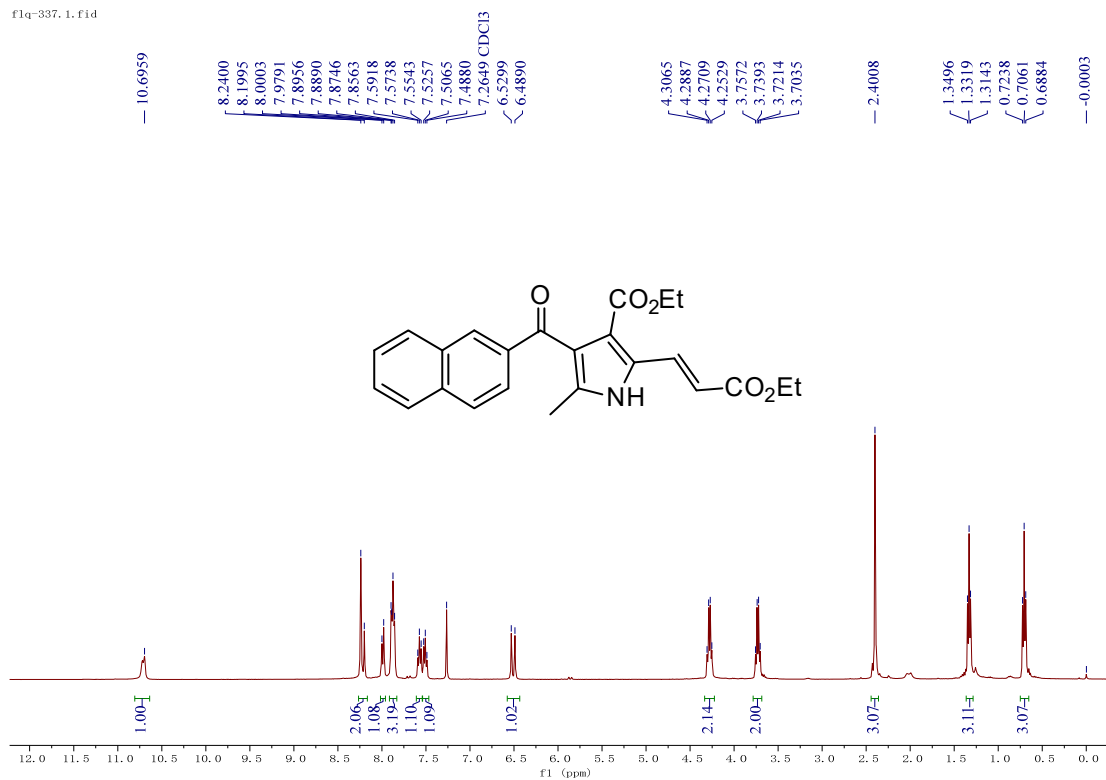

<sup>1</sup>H NMR spectrum of **3q** (400 MHz, CDCl<sub>3</sub>)

f1q-337-c. 1. fid

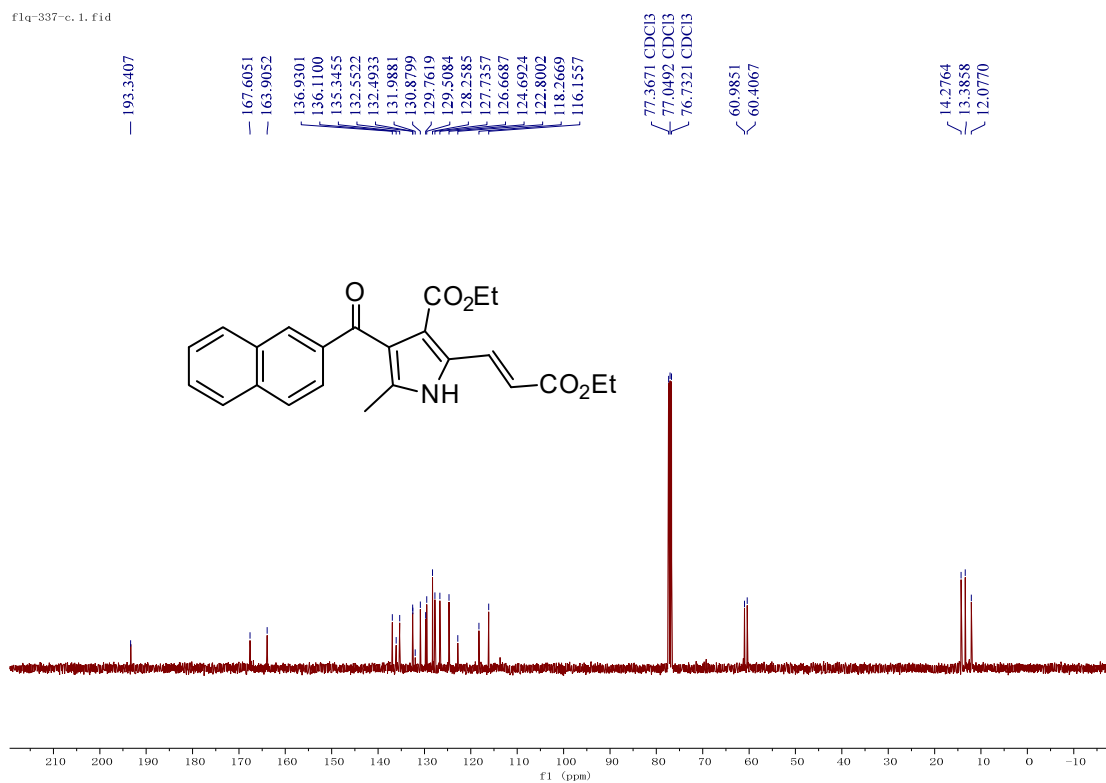

<sup>13</sup>C NMR spectrum of **3q** (100 MHz, CDCl<sub>3</sub>)

f1q-338. 1. fid

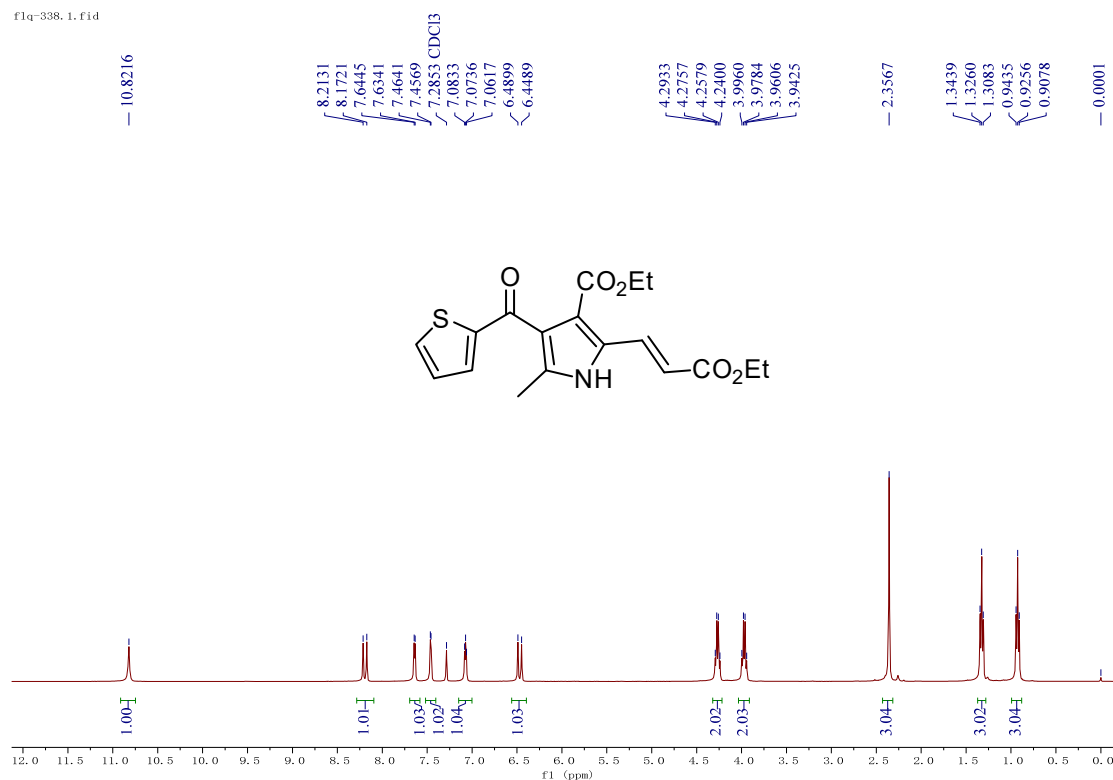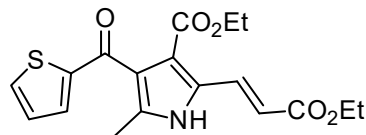

<sup>1</sup>H NMR spectrum of **3r** (400 MHz, CDCl<sub>3</sub>)

f1q-338-c. 1. fid

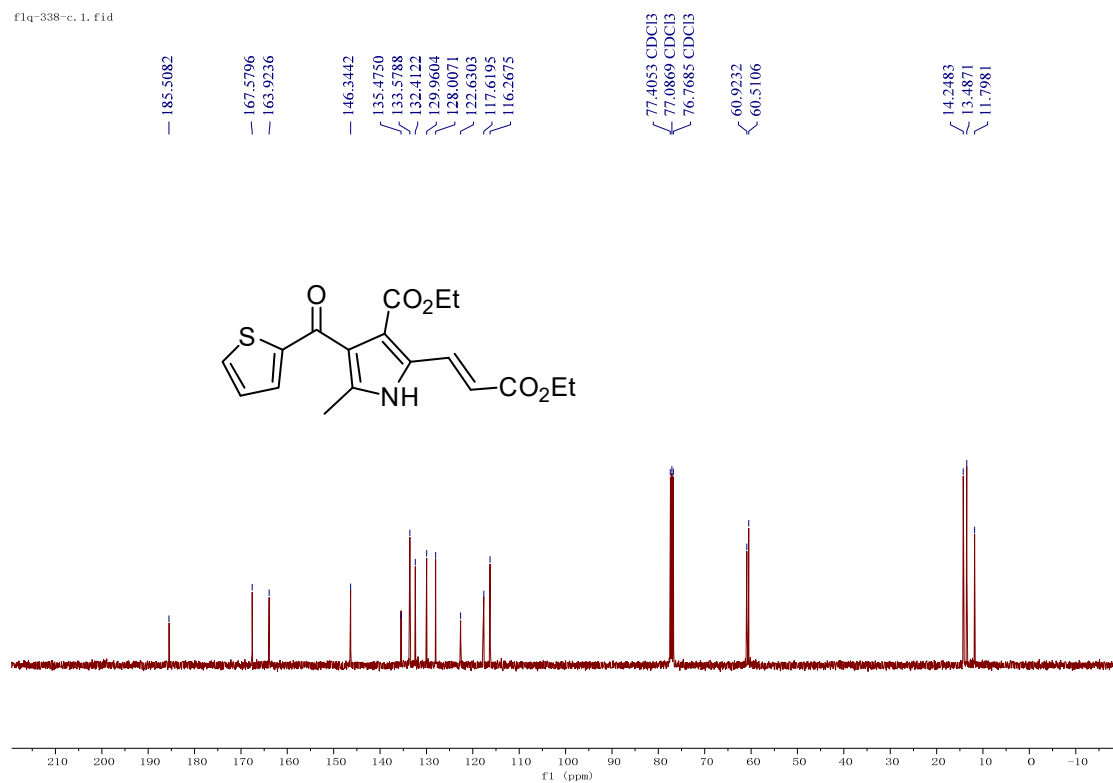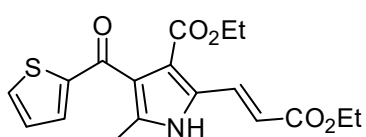

<sup>13</sup>C NMR spectrum of **3r** (100 MHz, CDCl<sub>3</sub>)

f1q-349. 1. fid

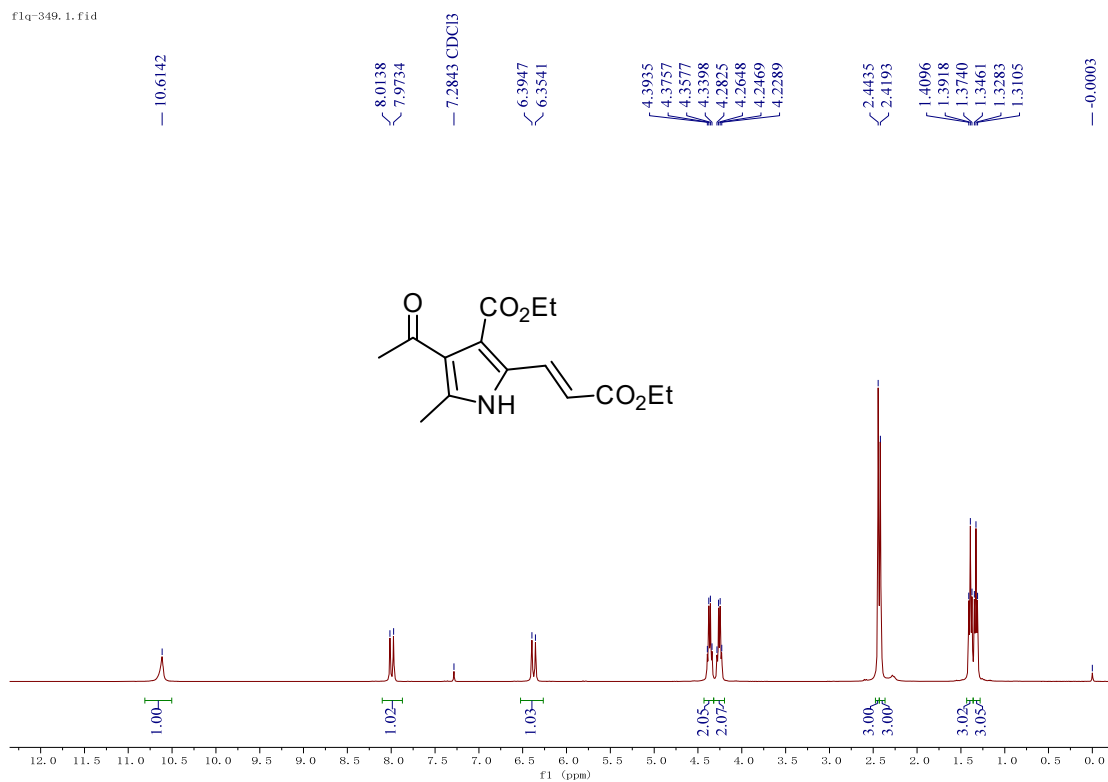

<sup>1</sup>H NMR spectrum of 3s (400 MHz, CDCl<sub>3</sub>)

f1q-349-c. 1. fid

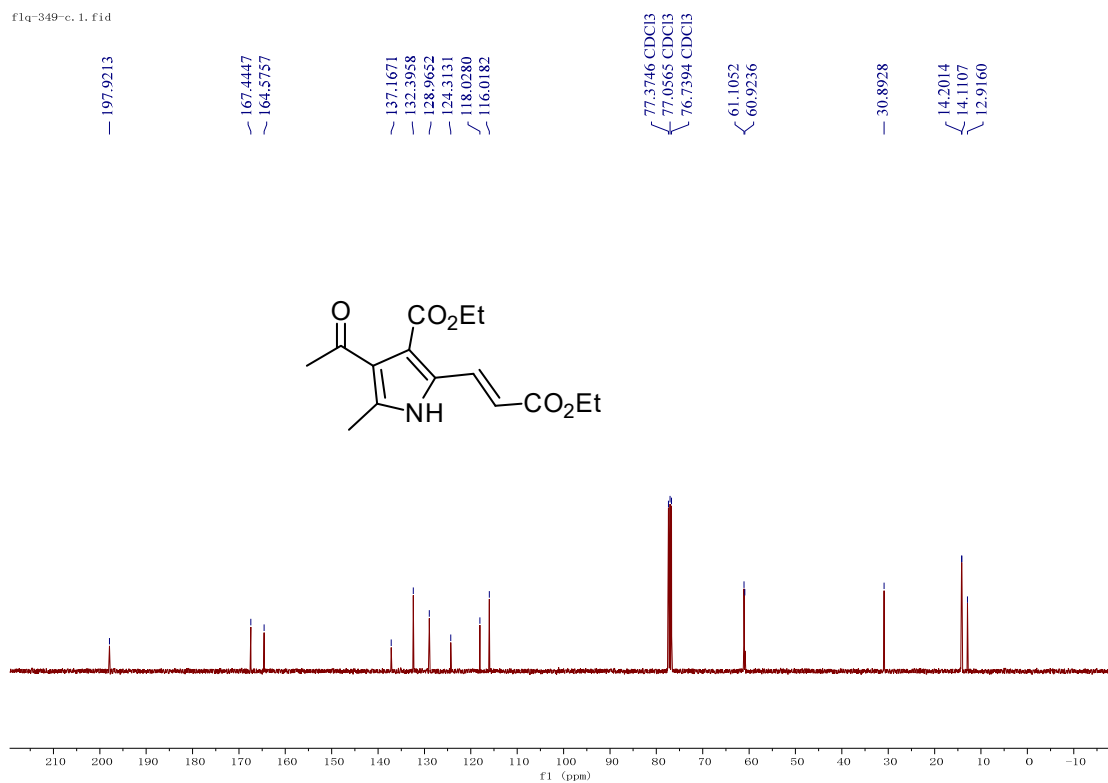

<sup>13</sup>C NMR spectrum of 3s (100 MHz, CDCl<sub>3</sub>)

f1q-353. 1. fid

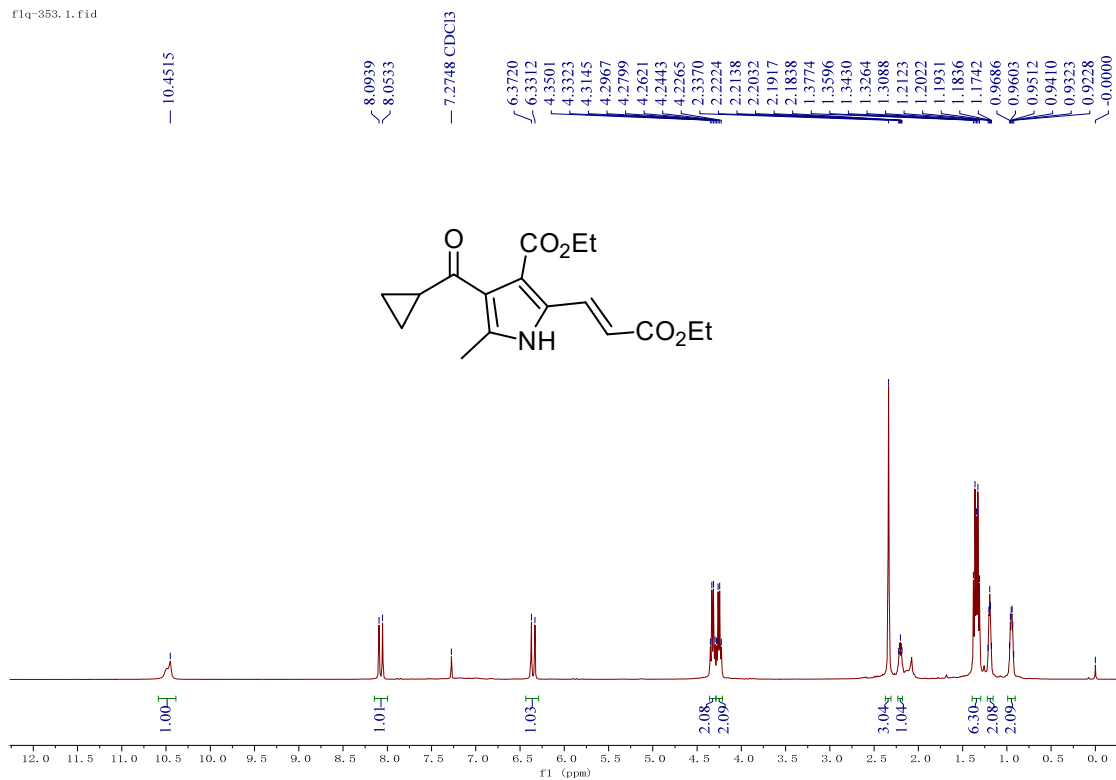

<sup>1</sup>H NMR spectrum of **3t** (400 MHz, CDCl<sub>3</sub>)

f1q-353-c. 1. fid

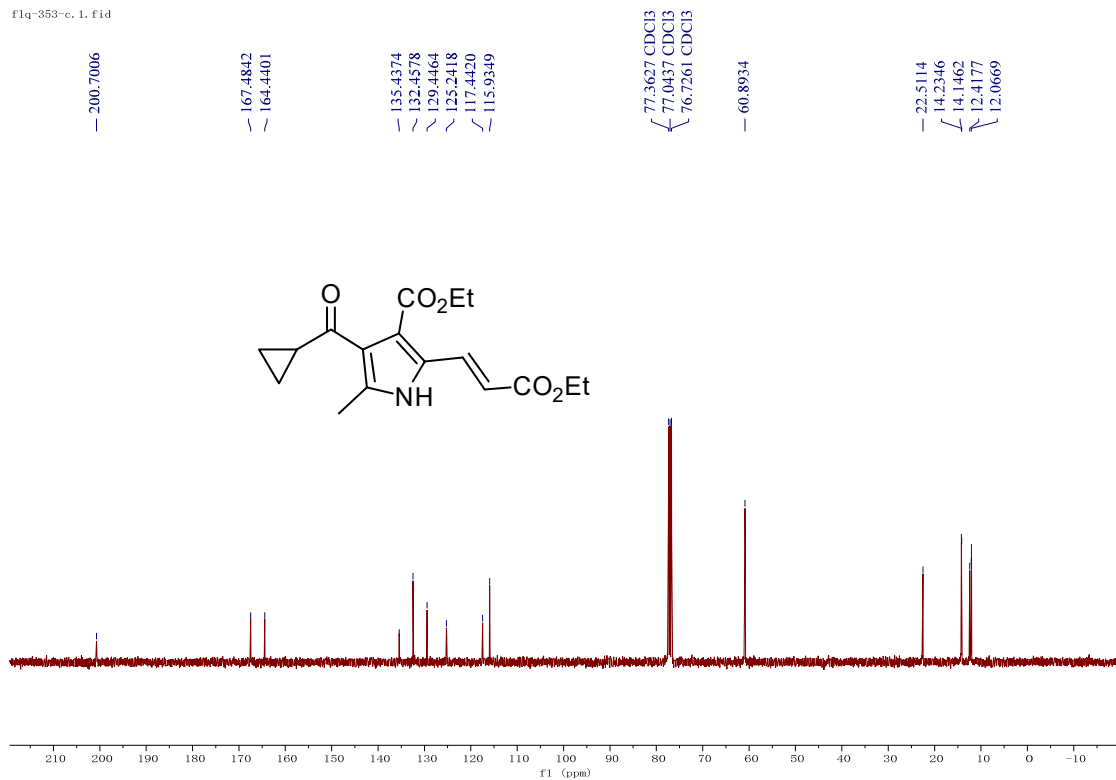

<sup>13</sup>C NMR spectrum of **3t** (100 MHz, CDCl<sub>3</sub>)

f1q-345-4.1.fid

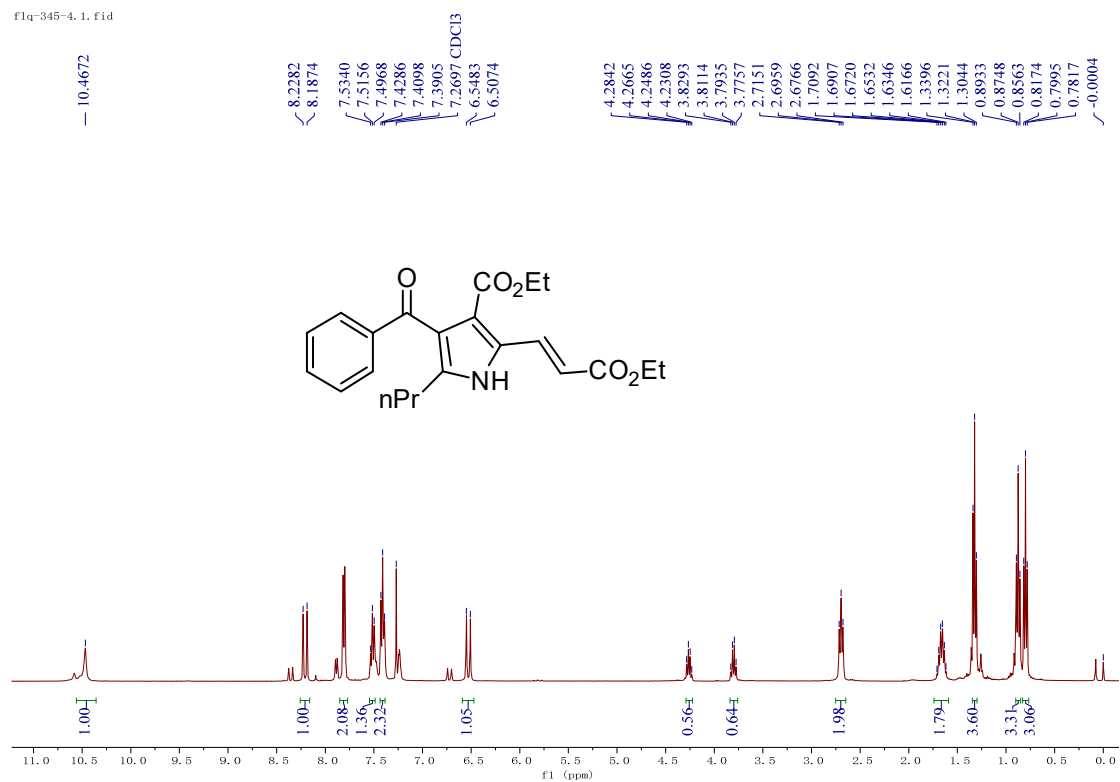

<sup>1</sup>H NMR spectrum of **3u** (400 MHz, CDCl<sub>3</sub>)

f1q-345-4-1.1.fid

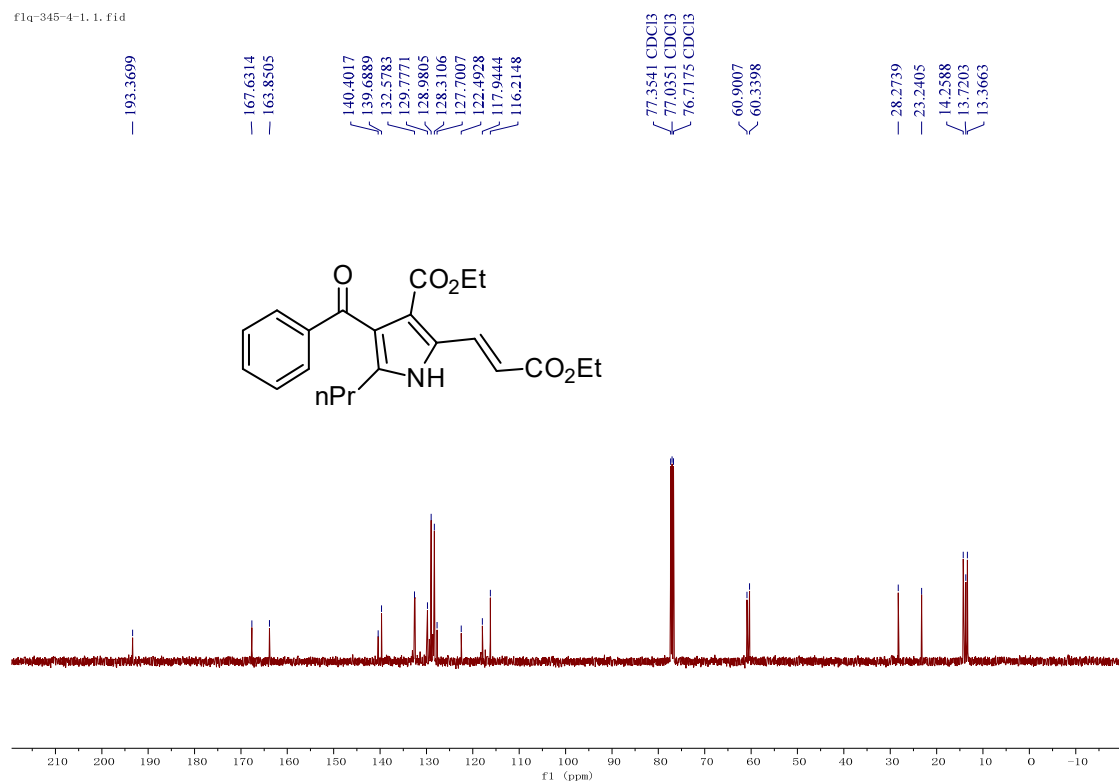

<sup>13</sup>C NMR spectrum of **3u** (100 MHz, CDCl<sub>3</sub>)

f1q-346.1.fid

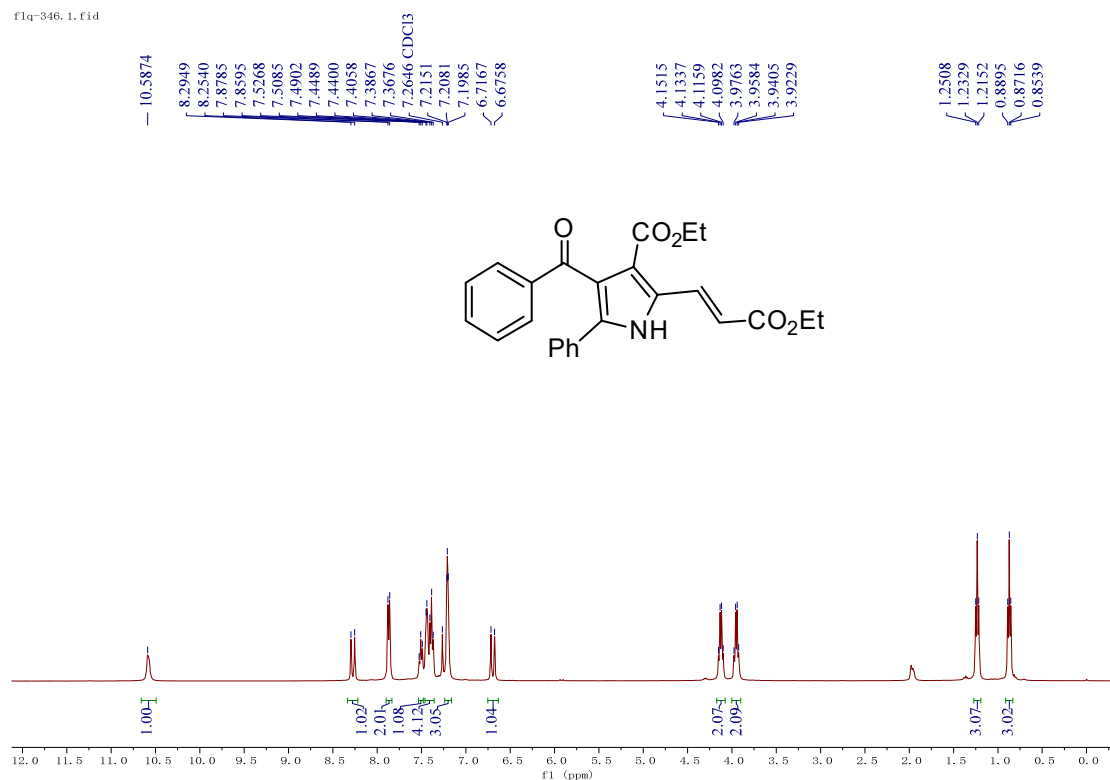

<sup>1</sup>H NMR spectrum of **3v** (400 MHz, CDCl<sub>3</sub>)

f1q-346-c.1.fid

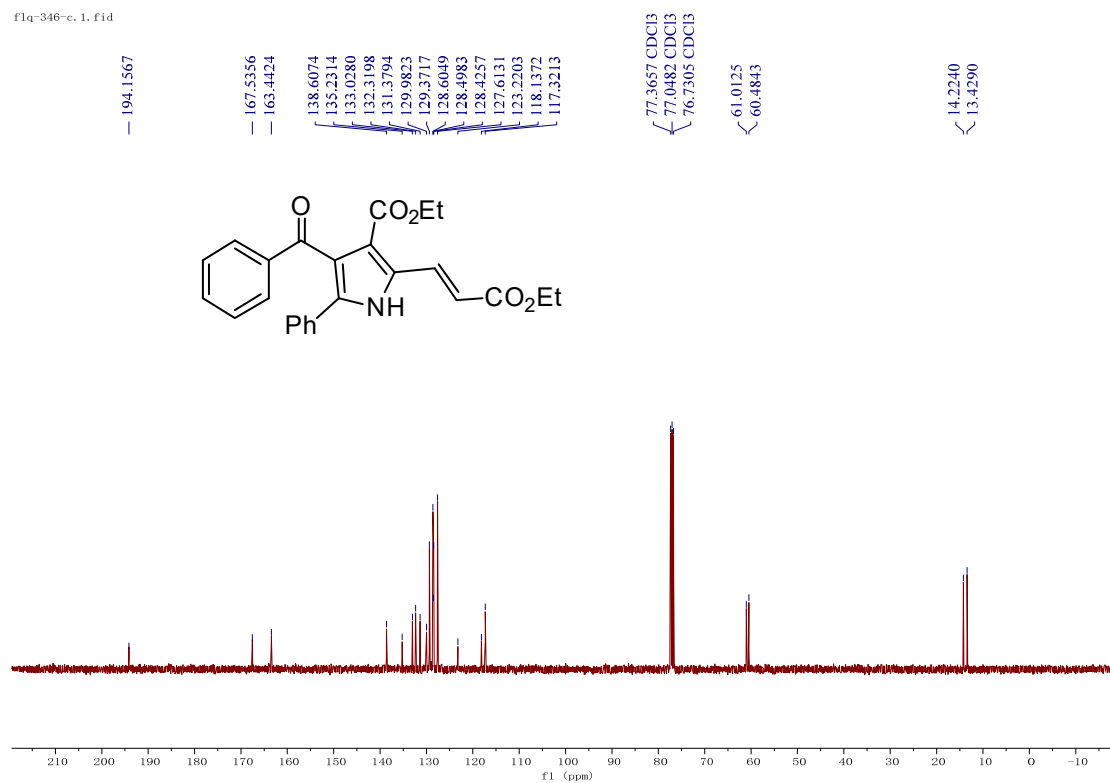

<sup>13</sup>C NMR spectrum of **3v** (100 MHz, CDCl<sub>3</sub>)

f1q-358.1.fid

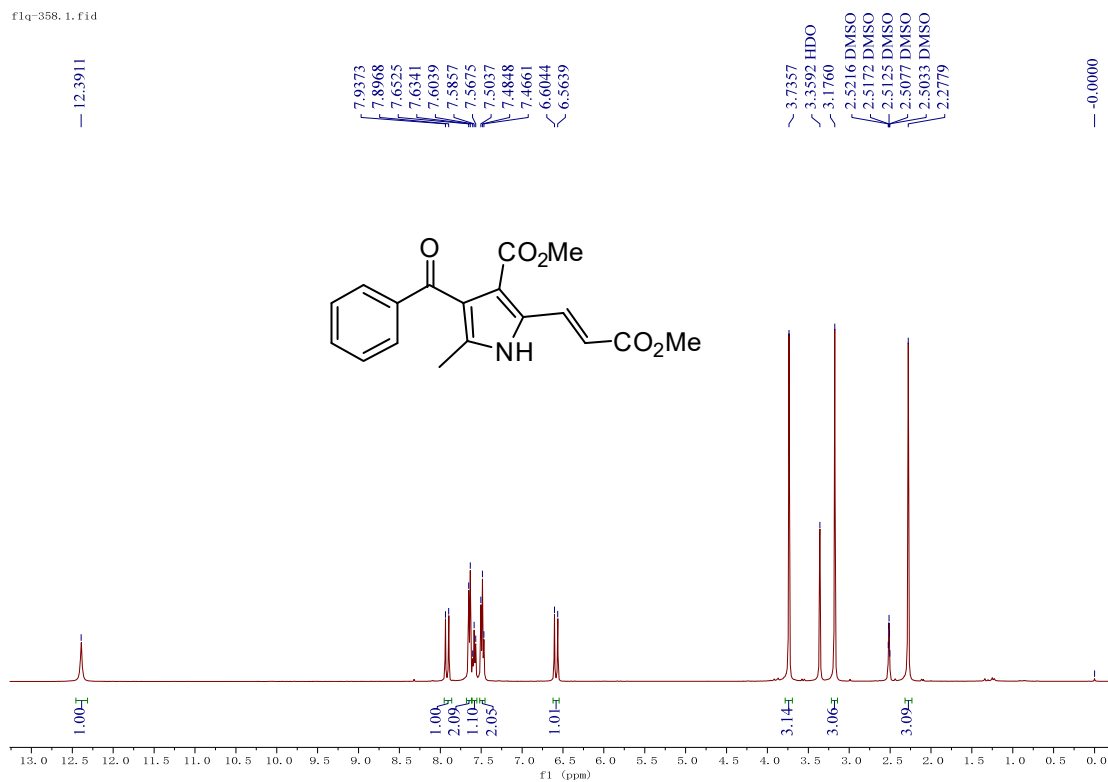

<sup>1</sup>H NMR spectrum of **3w** (400 MHz, DMSO-*d*<sub>6</sub>)

f1q-358-c.1.fid

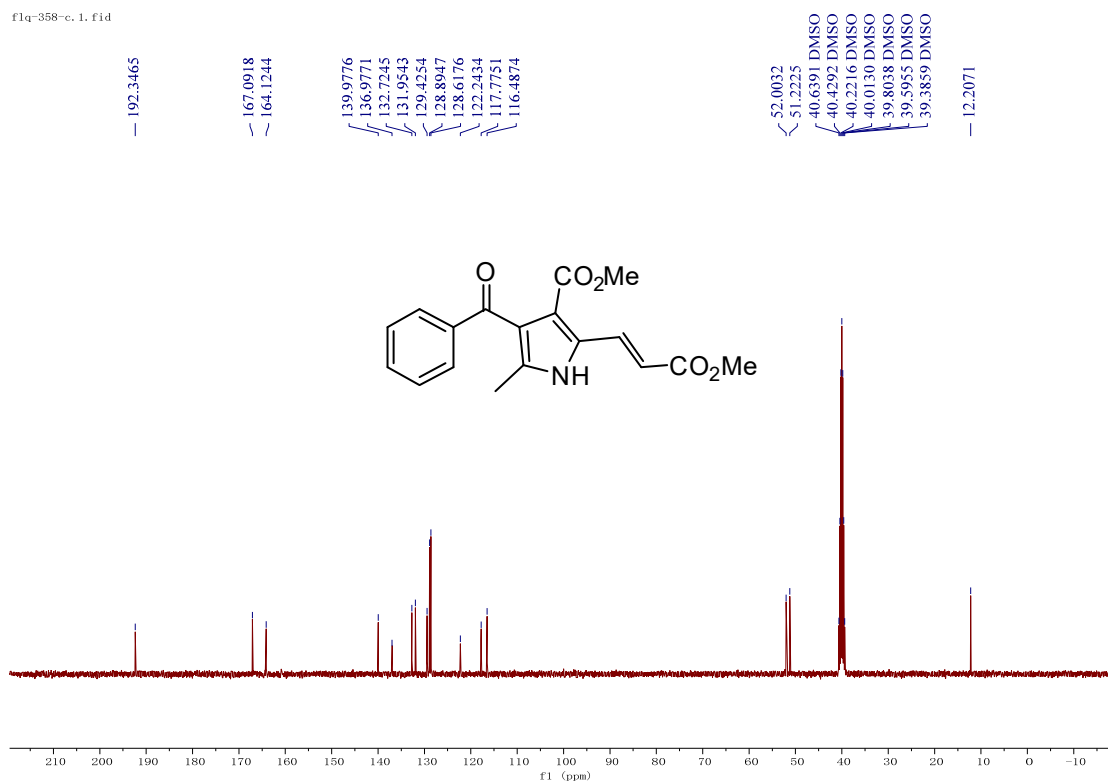

<sup>13</sup>C NMR spectrum of **3w** (100 MHz, DMSO-*d*<sub>6</sub>)



f1q-356-2. 1. fid

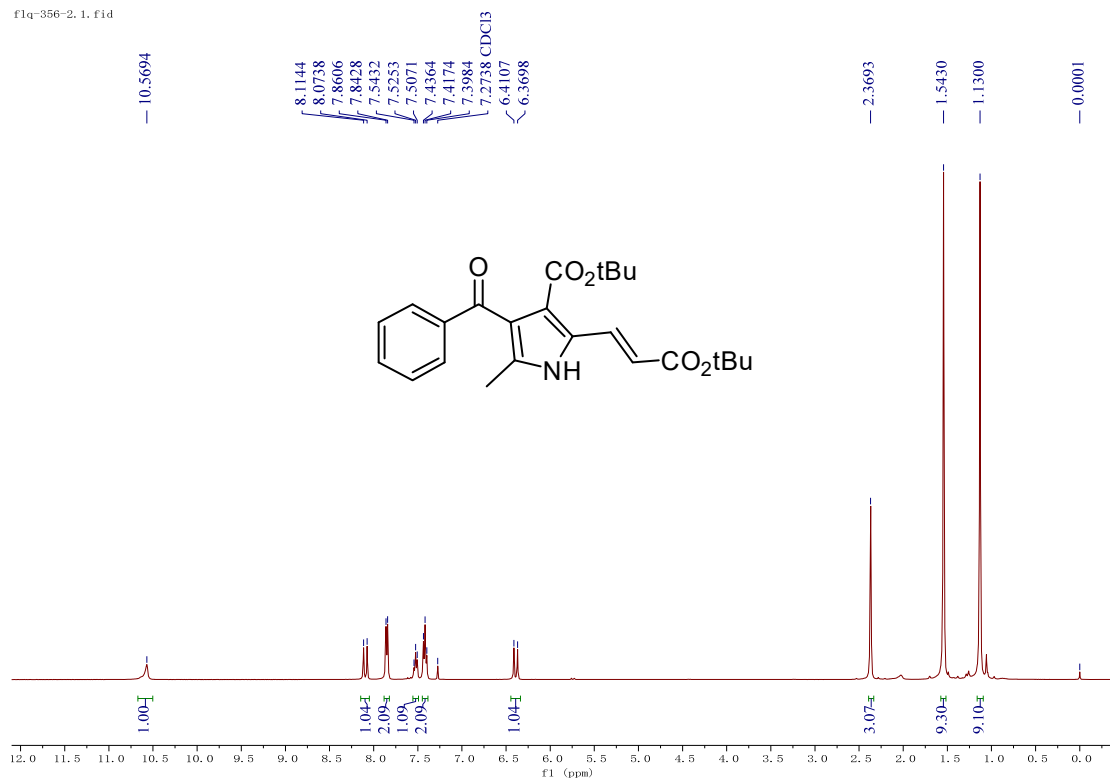

<sup>1</sup>H NMR spectrum of **3x** (400 MHz, CDCl<sub>3</sub>)

f1q-356-2-c. 1. fid

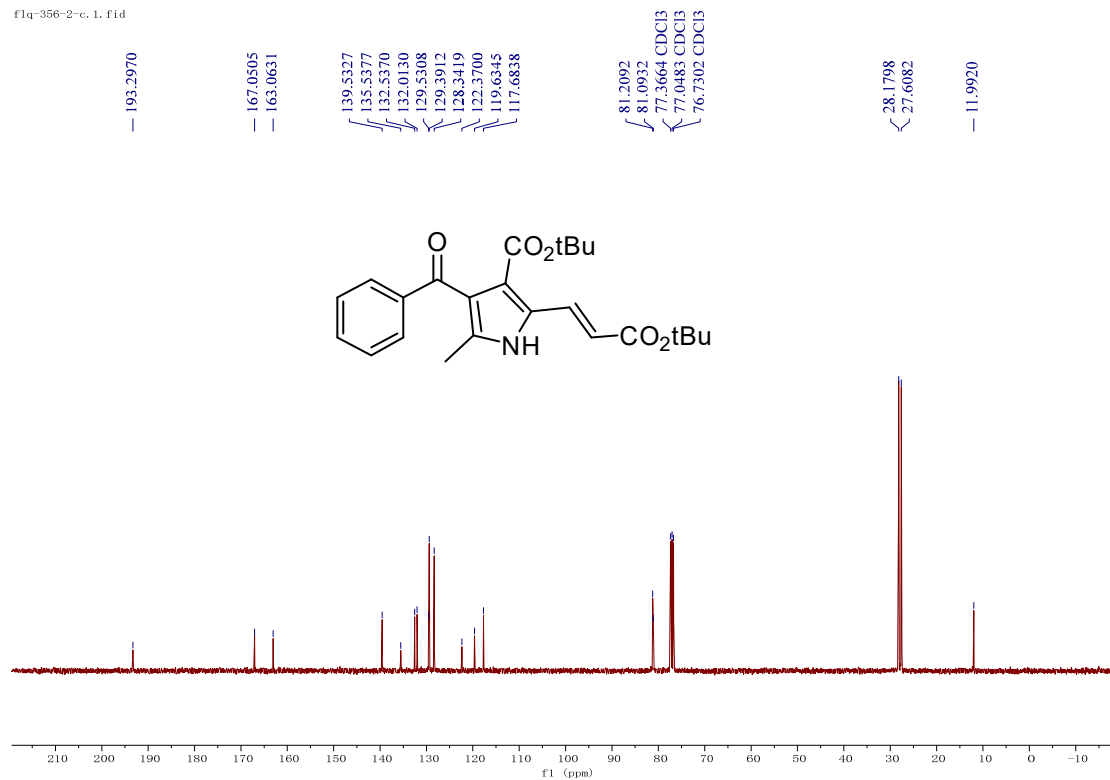

<sup>13</sup>C NMR spectrum of **3x** (100 MHz, CDCl<sub>3</sub>)

f1q-359.1.fid

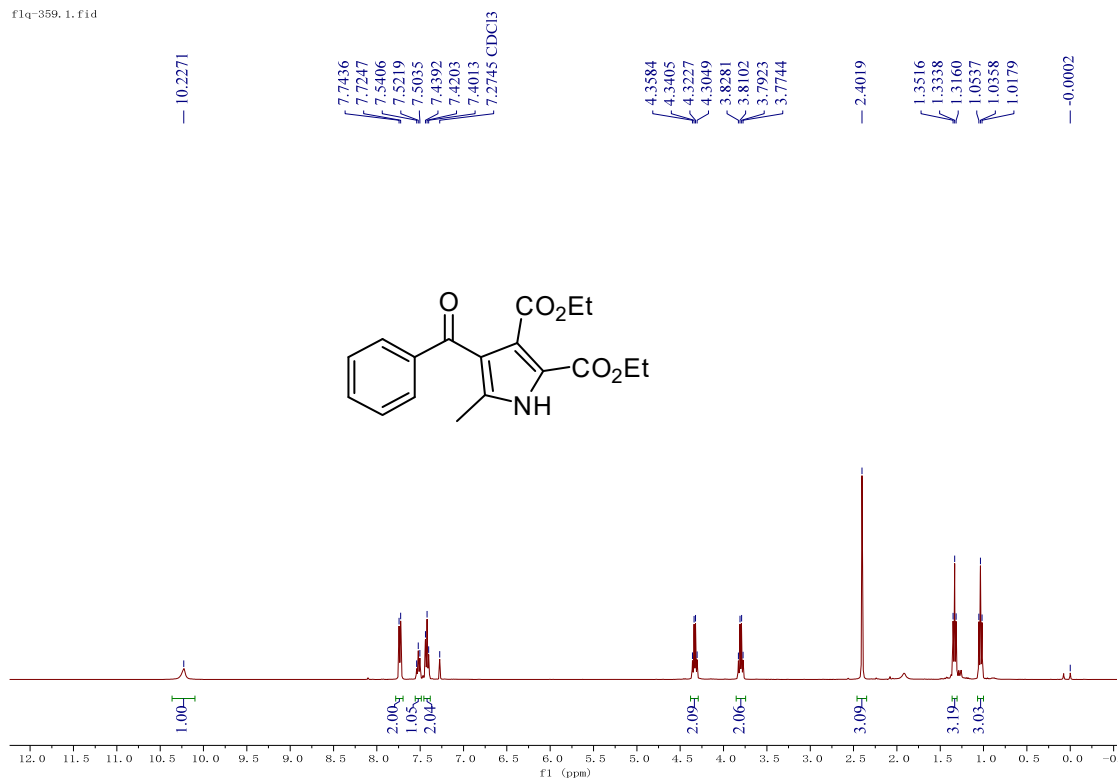

<sup>1</sup>H NMR spectrum of 5a (400 MHz, CDCl<sub>3</sub>)

f1q-359-1.1.fid

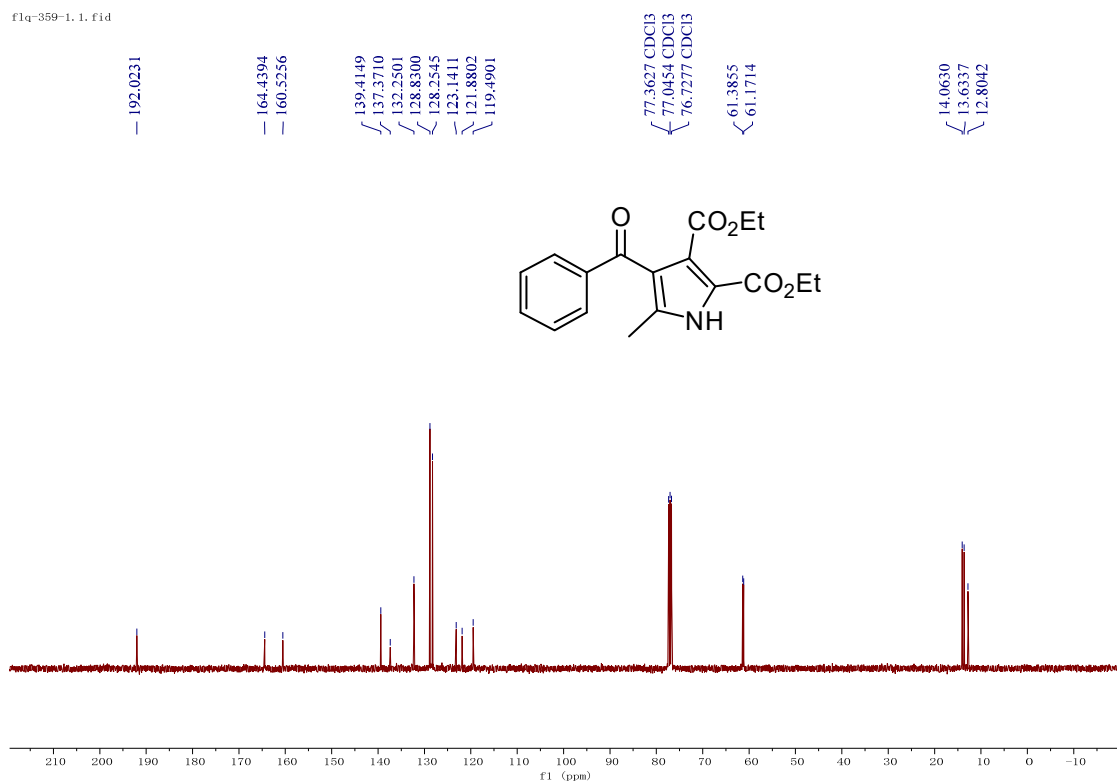

<sup>13</sup>C NMR spectrum of 5a (100 MHz, CDCl<sub>3</sub>)

f1q-362. 1. fid

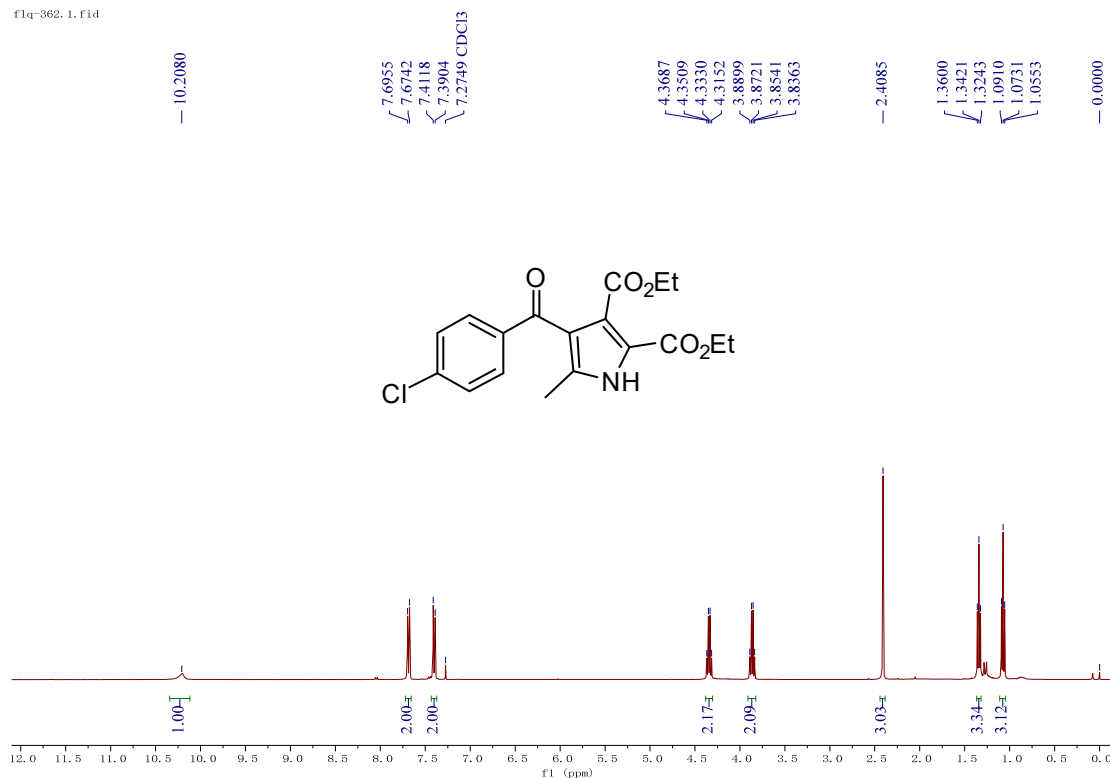

<sup>1</sup>H NMR spectrum of **5b** (400 MHz, CDCl<sub>3</sub>)

f1q-362. 10. fid

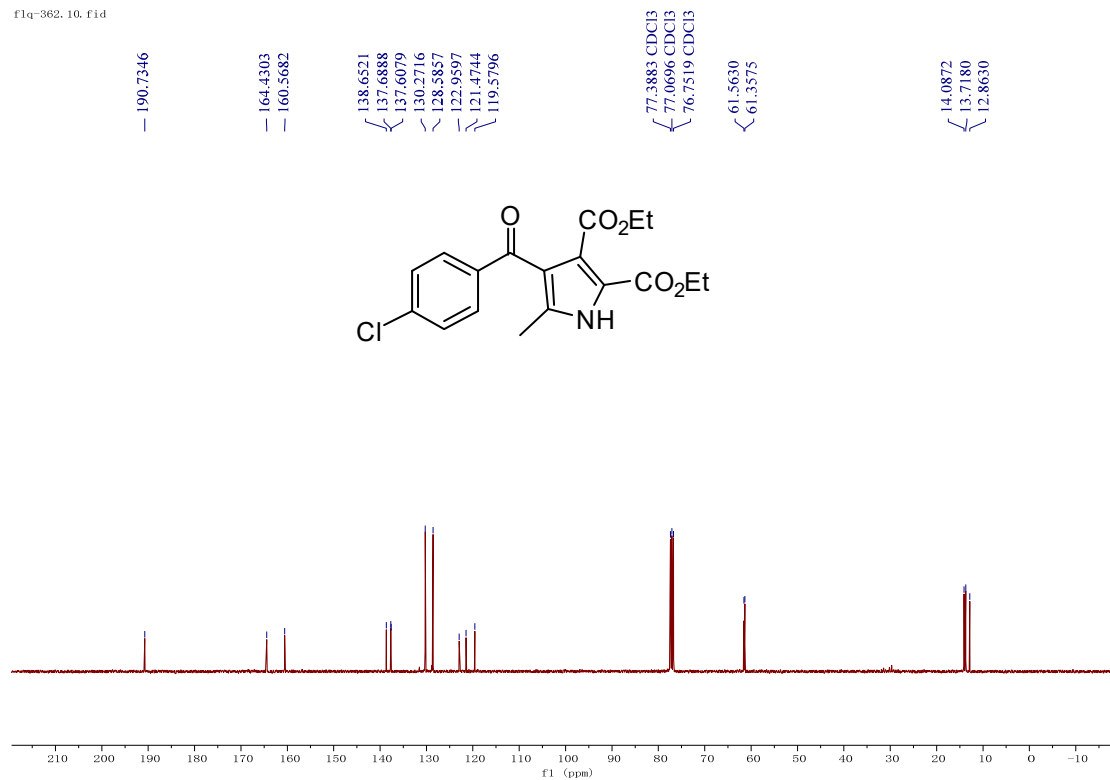

<sup>13</sup>C NMR spectrum of **5b** (100 MHz, CDCl<sub>3</sub>)

f1q-363. 1. fid

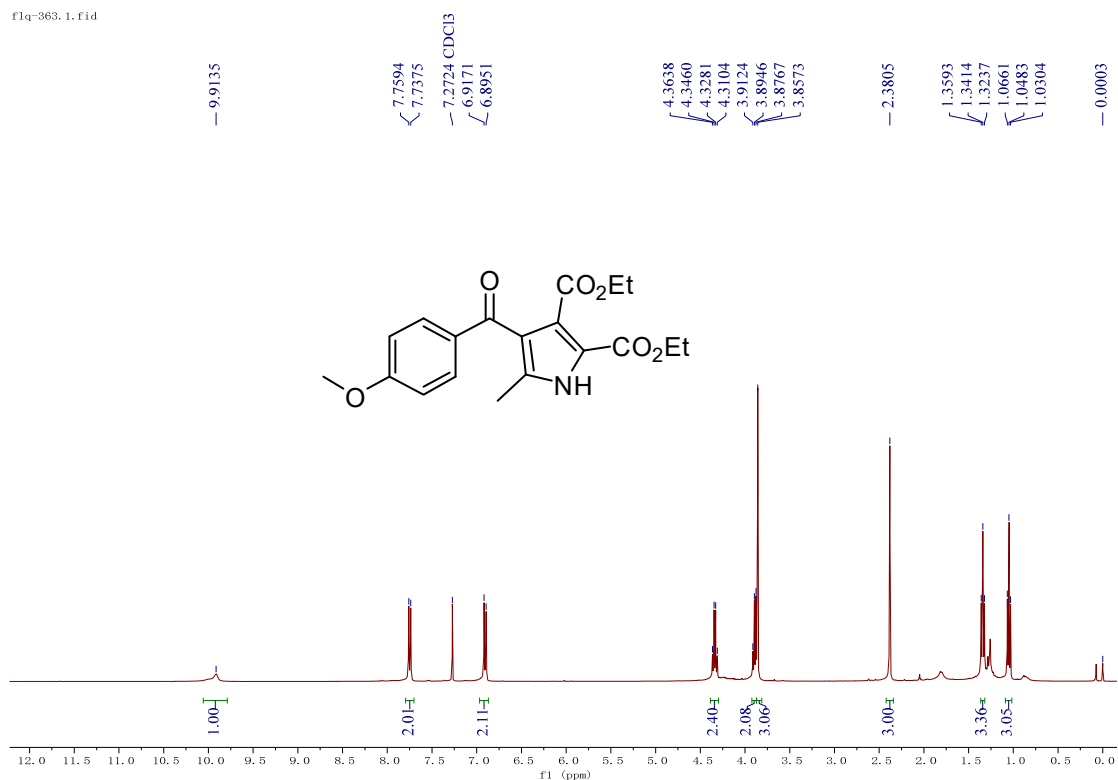

<sup>1</sup>H NMR spectrum of 5c (400 MHz, CDCl<sub>3</sub>)

f1q-363. 10. fid

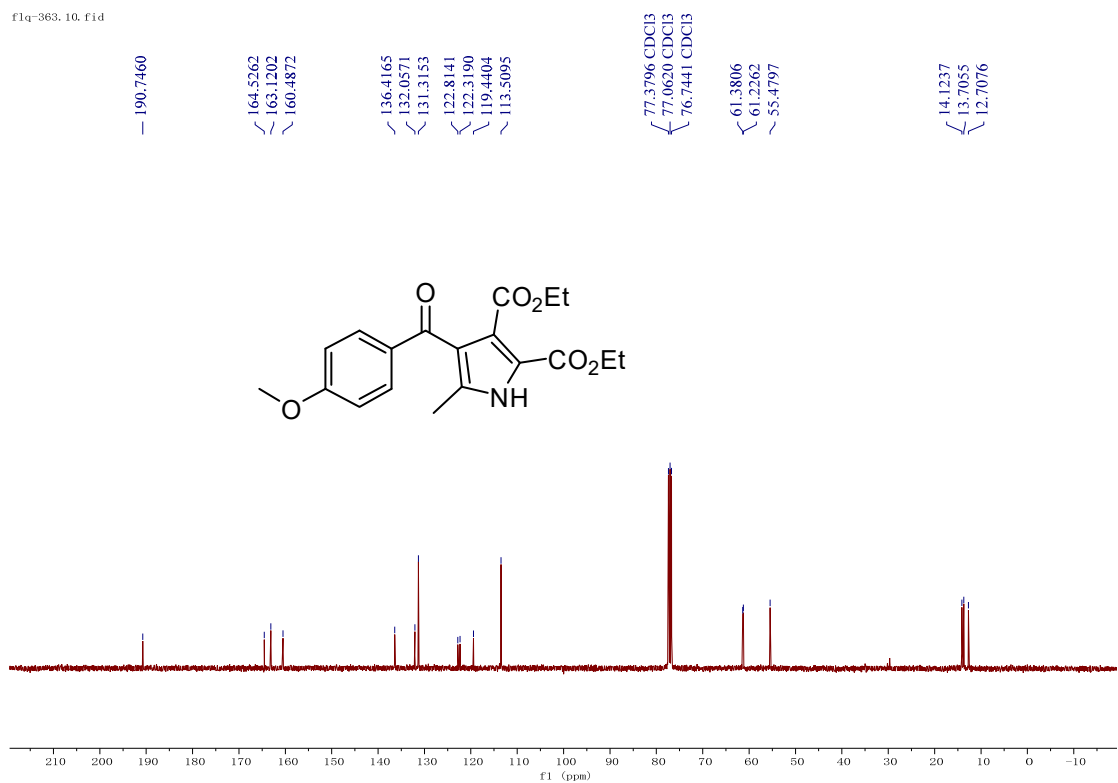

<sup>13</sup>C NMR spectrum of 5c (100 MHz, CDCl<sub>3</sub>)

f1q-364.1.fid

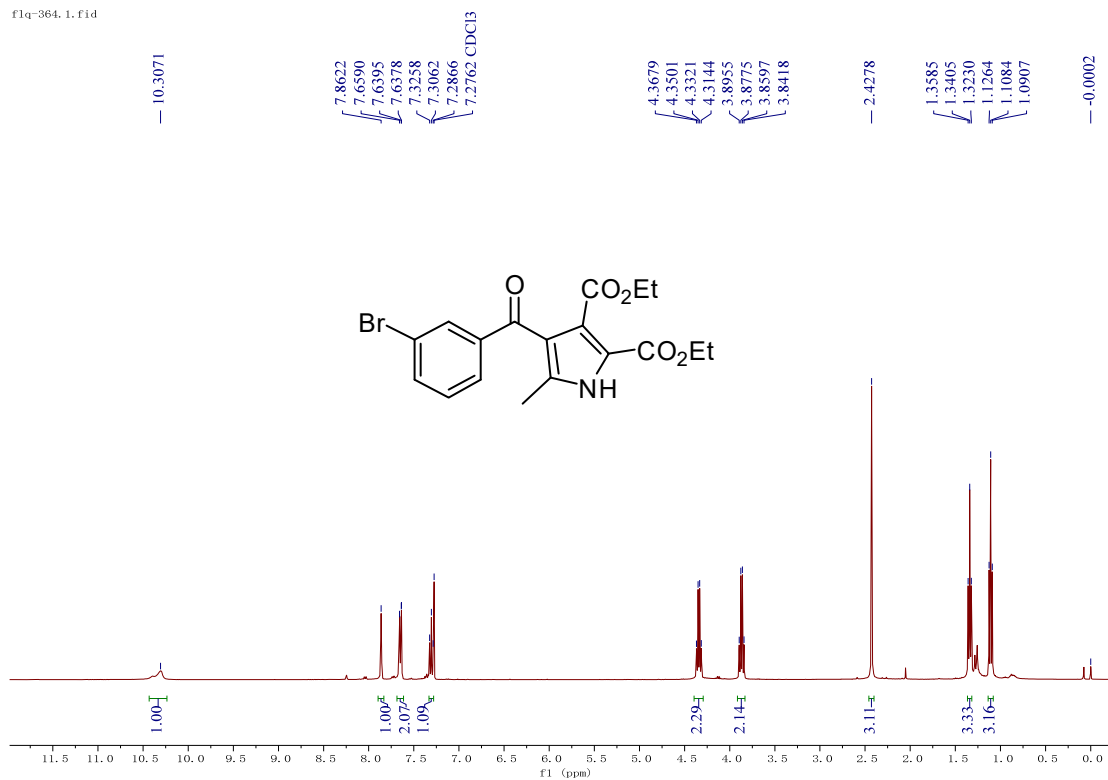

<sup>1</sup>H NMR spectrum of **5d** (400 MHz, CDCl<sub>3</sub>)

f1q-364.10.fid

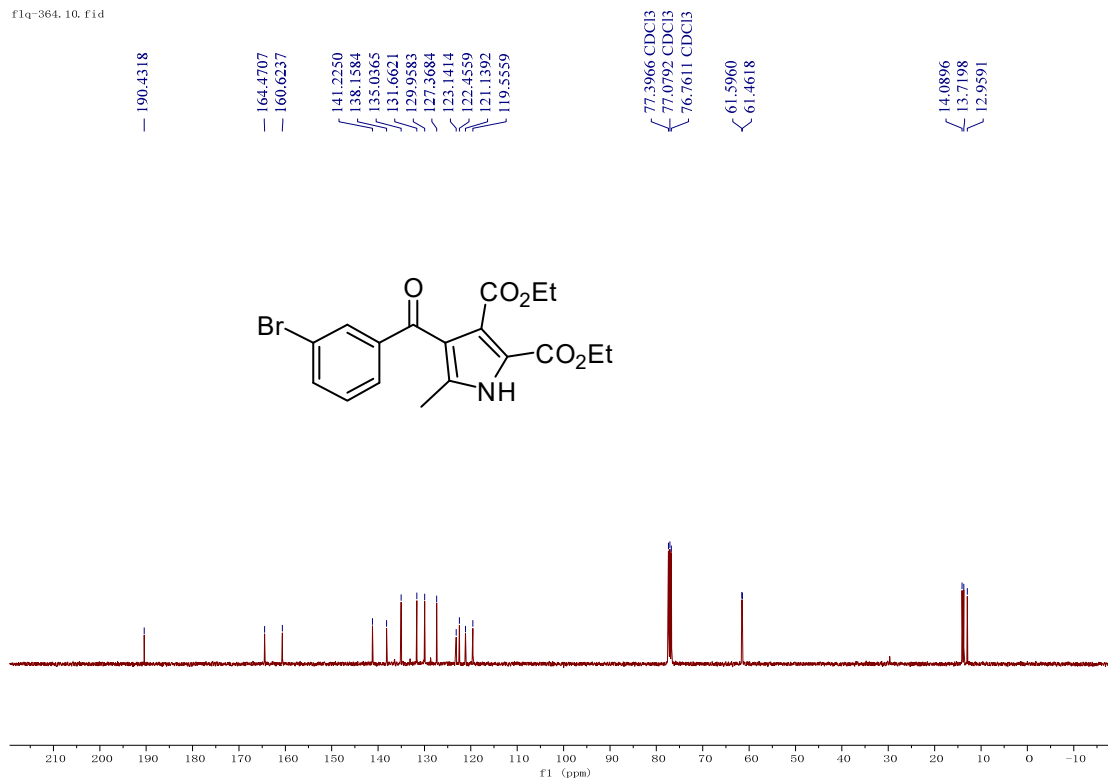

<sup>13</sup>C NMR spectrum of **5d** (100 MHz, CDCl<sub>3</sub>)

f1q-365. 1. fid

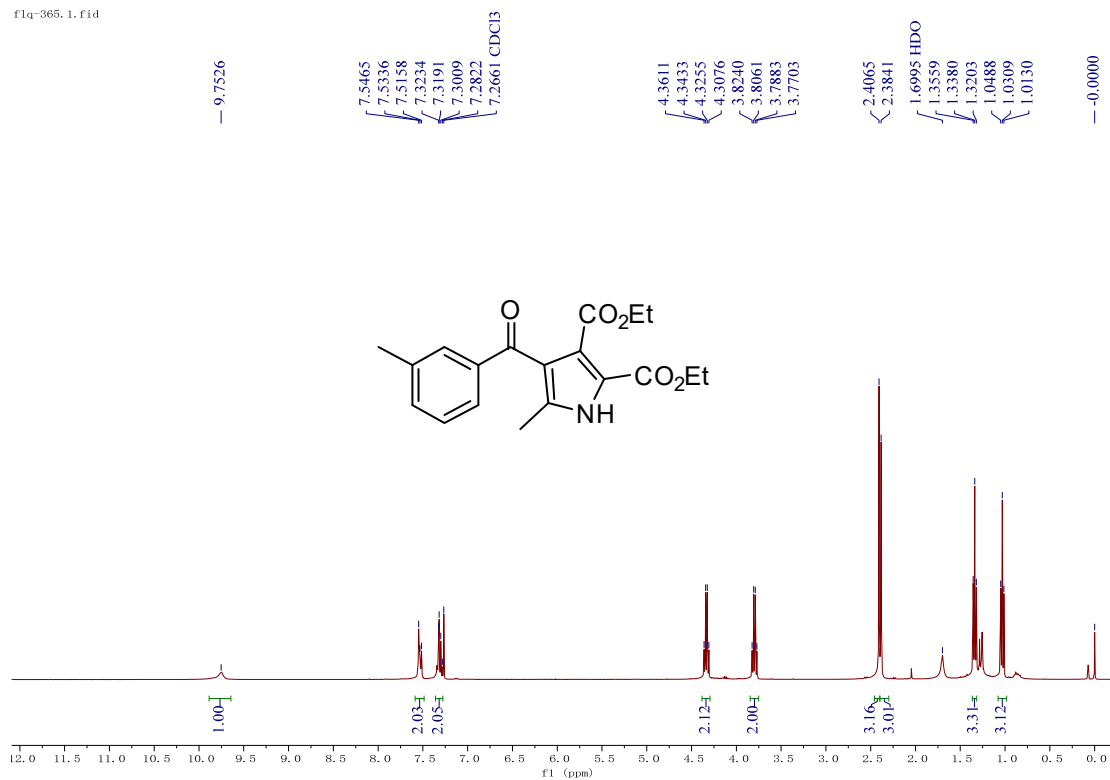

<sup>1</sup>H NMR spectrum of 5e (400 MHz, CDCl<sub>3</sub>)

f1q-365. 10. fid

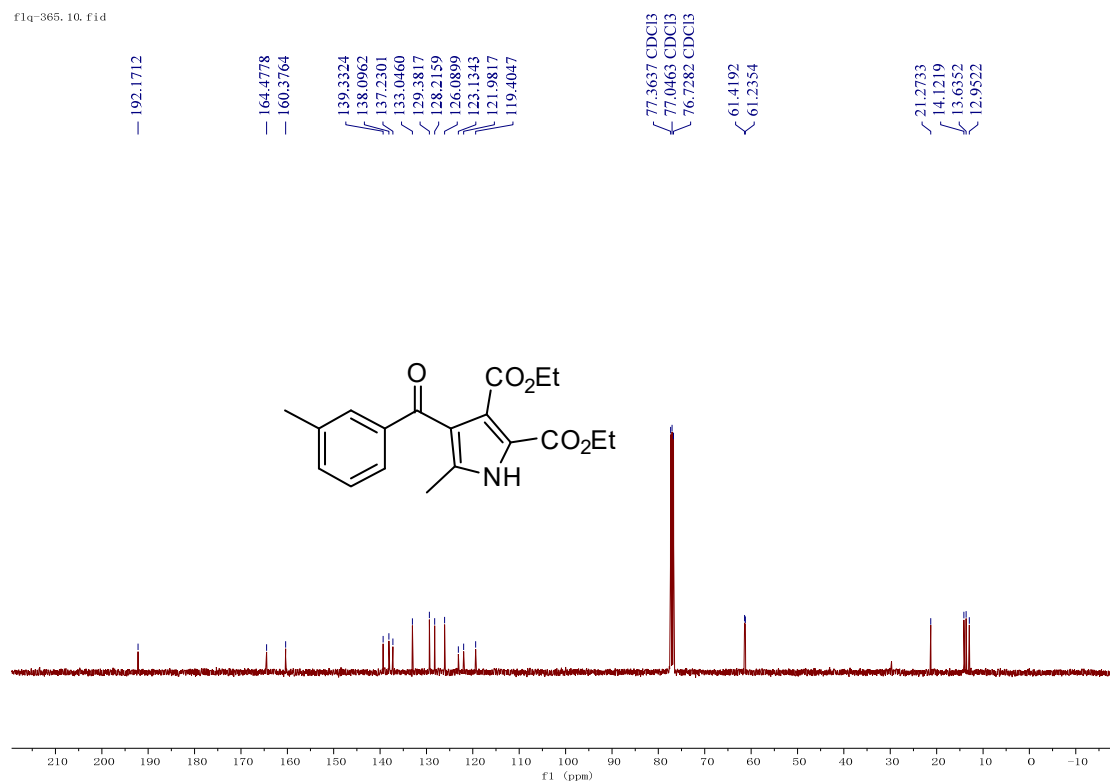

<sup>13</sup>C NMR spectrum of 5e (100 MHz, CDCl<sub>3</sub>)

f1q-381.10.fid

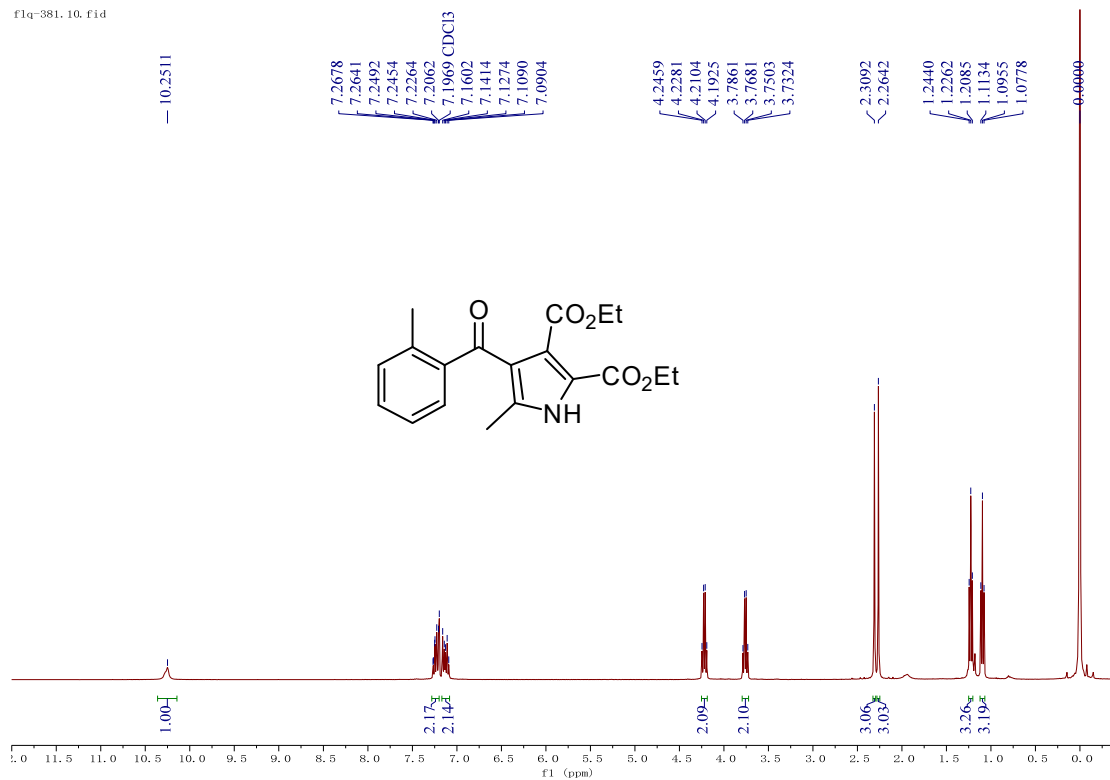

<sup>1</sup>H NMR spectrum of **5f** (400 MHz, CDCl<sub>3</sub>)

f1q-381.11.fid

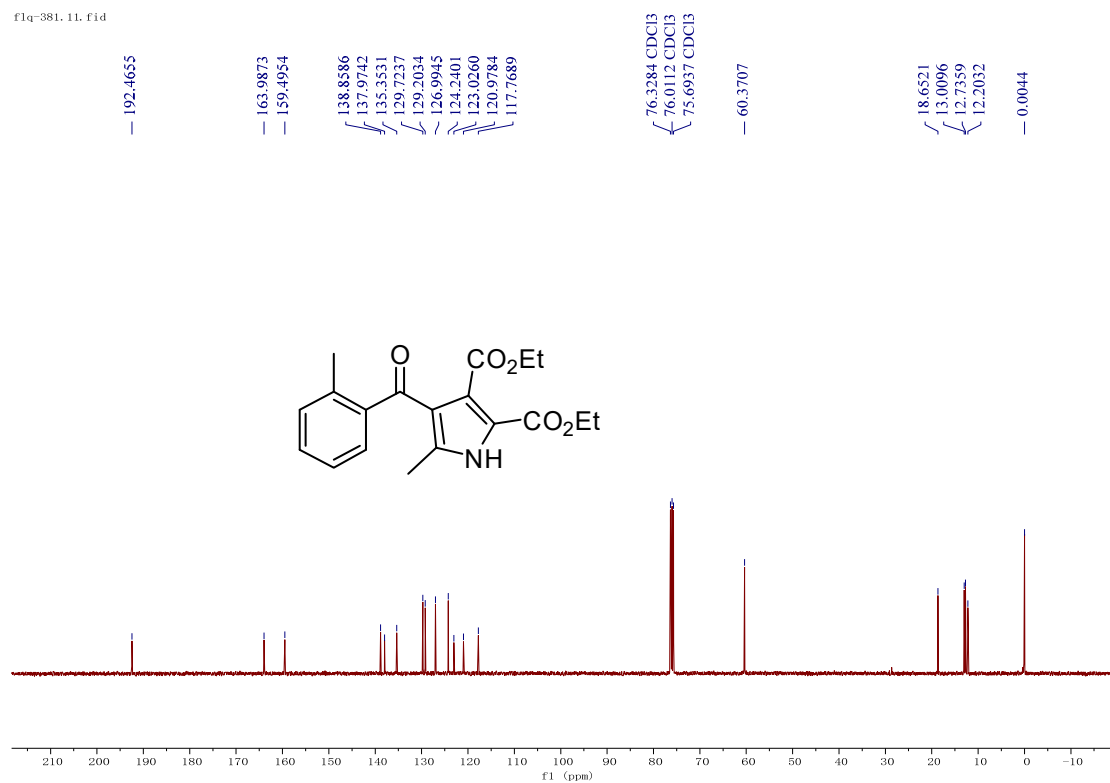

<sup>13</sup>C NMR spectrum of **5f** (100 MHz, CDCl<sub>3</sub>)

f1q-366. 1. fid

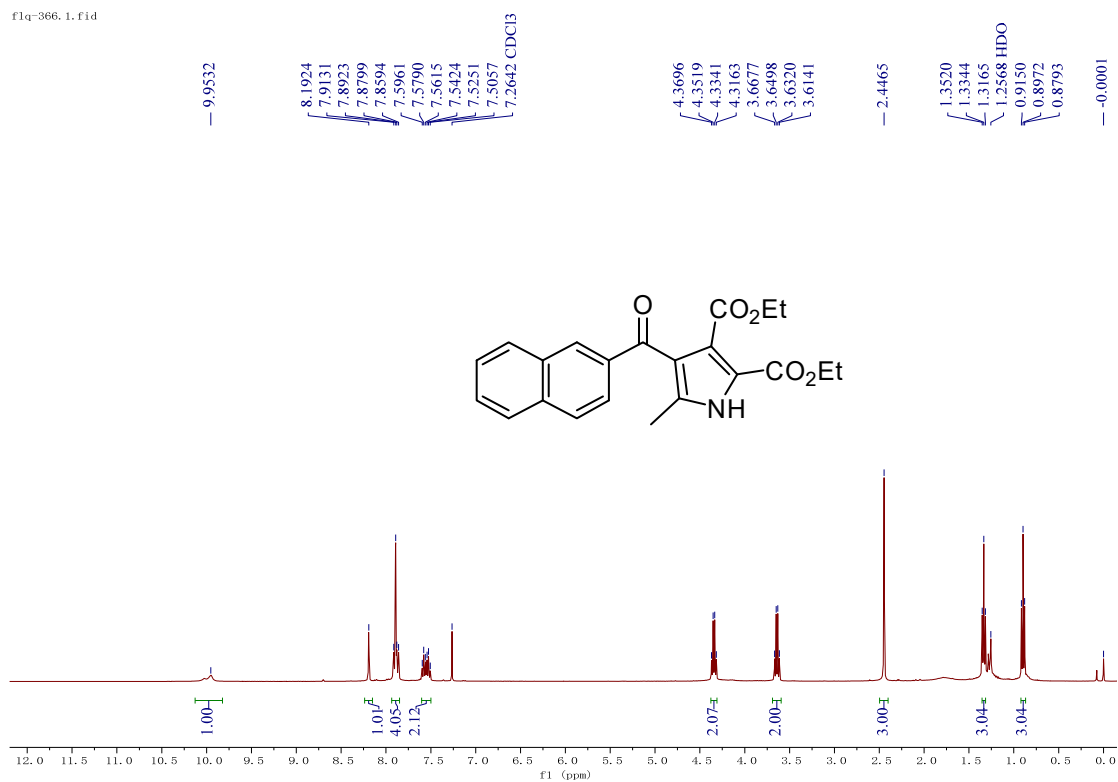

<sup>1</sup>H NMR spectrum of **5g** (400 MHz, CDCl<sub>3</sub>)

f1q-366. 10. fid

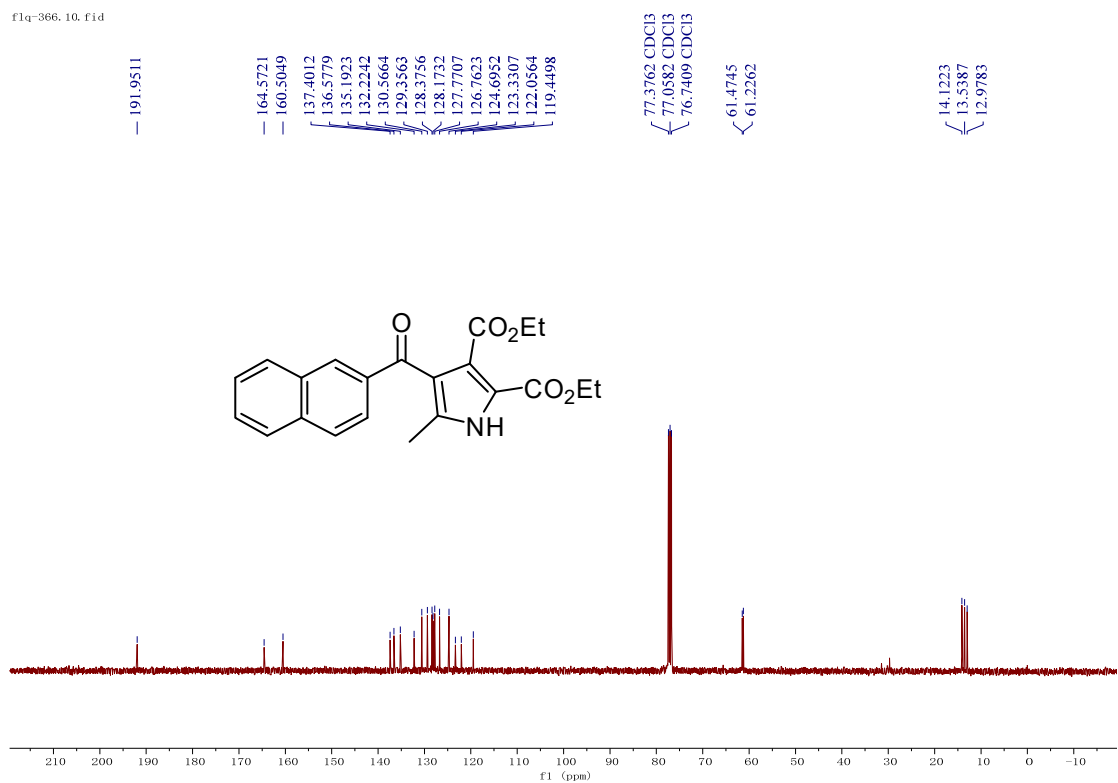

<sup>13</sup>C NMR spectrum of **5g** (100 MHz, CDCl<sub>3</sub>)



f1q-368.10.fid

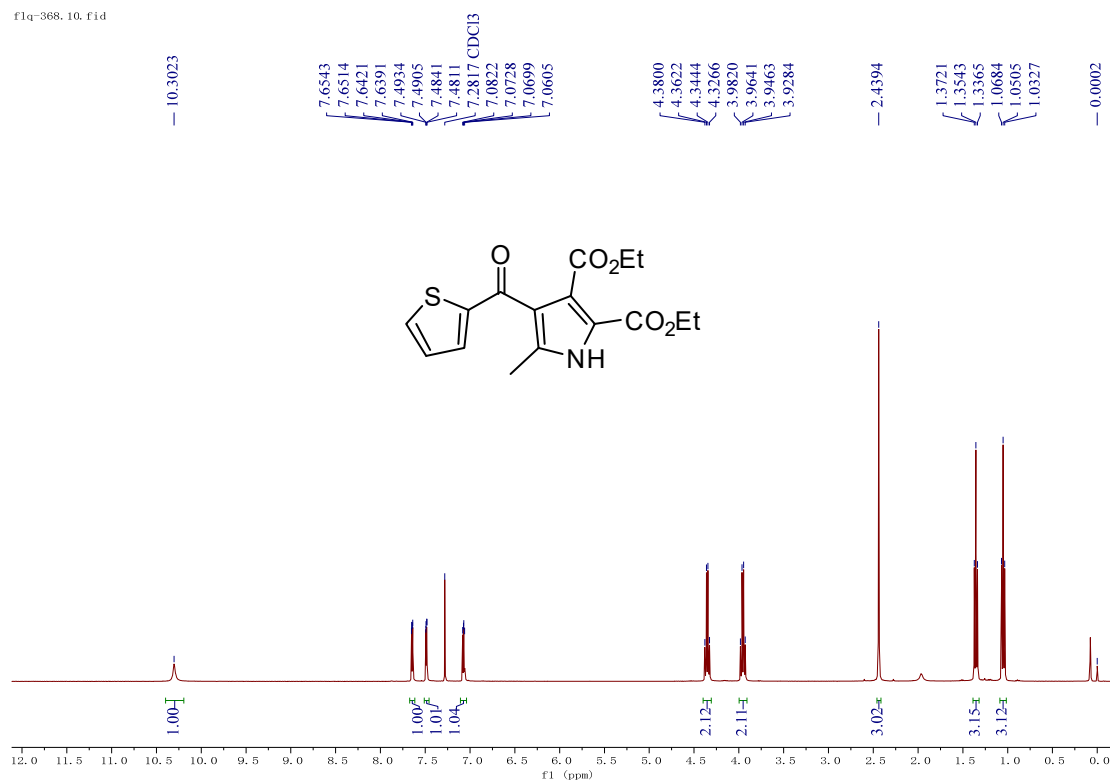

<sup>1</sup>H NMR spectrum of **5h** (400 MHz, CDCl<sub>3</sub>)

f1q-368.11.fid

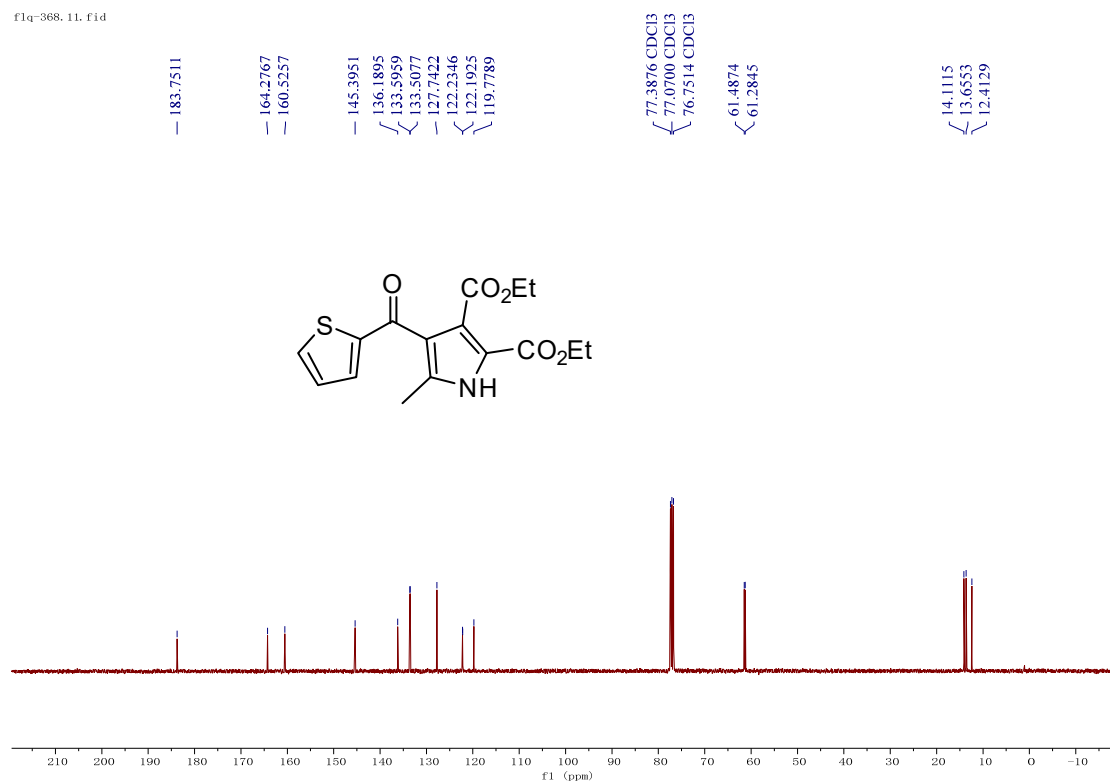

<sup>13</sup>C NMR spectrum of **5h** (100 MHz, CDCl<sub>3</sub>)

f1q-367. 10. fid

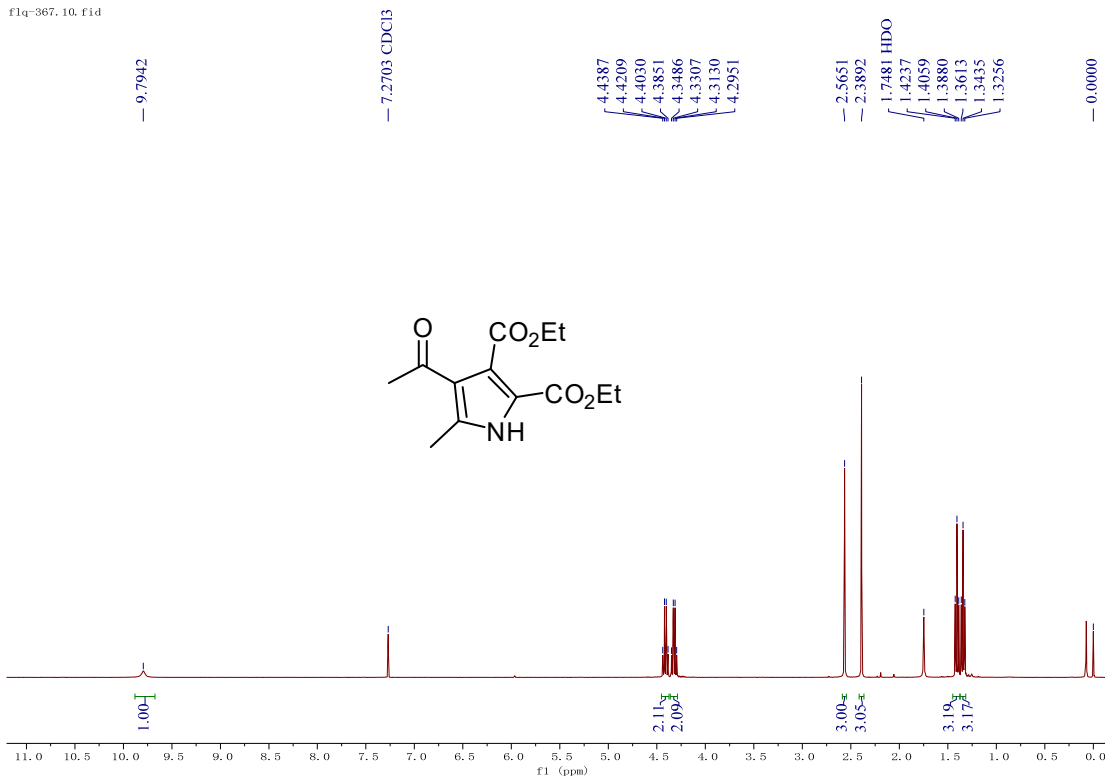

<sup>1</sup>H NMR spectrum of **5i** (400 MHz, CDCl<sub>3</sub>)

f1q-367. 11. fid

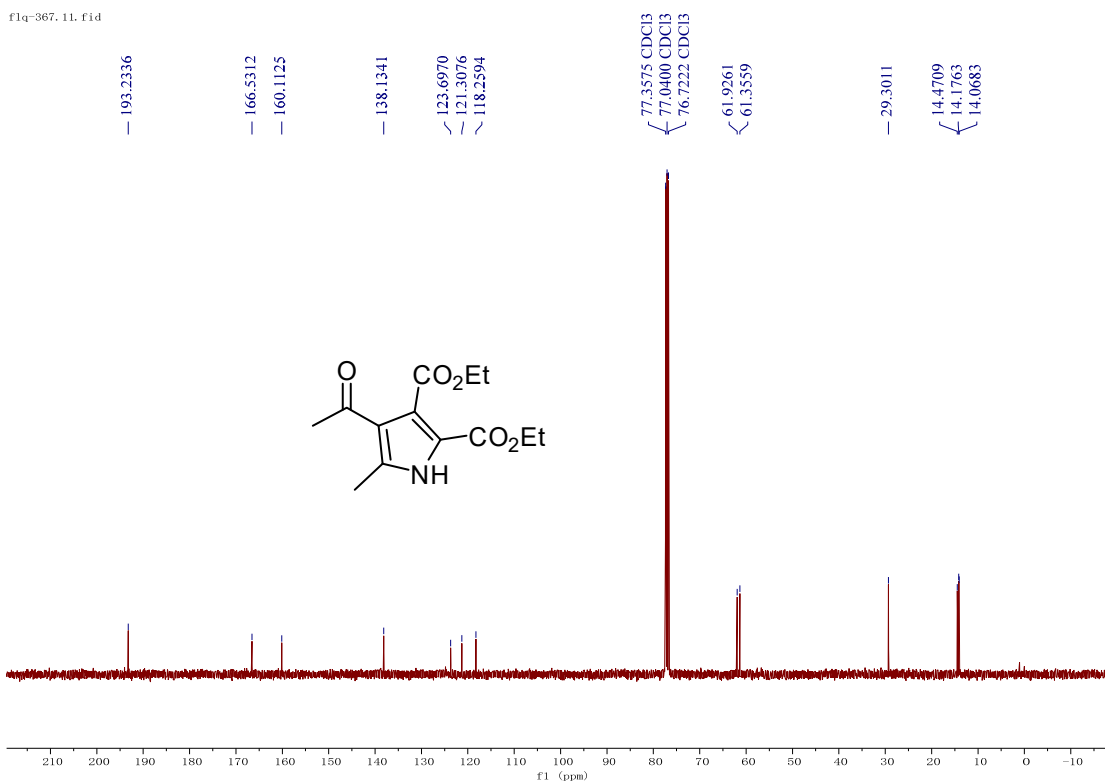

<sup>13</sup>C NMR spectrum of **5i** (100 MHz, CDCl<sub>3</sub>)

f1q-380.10.fid

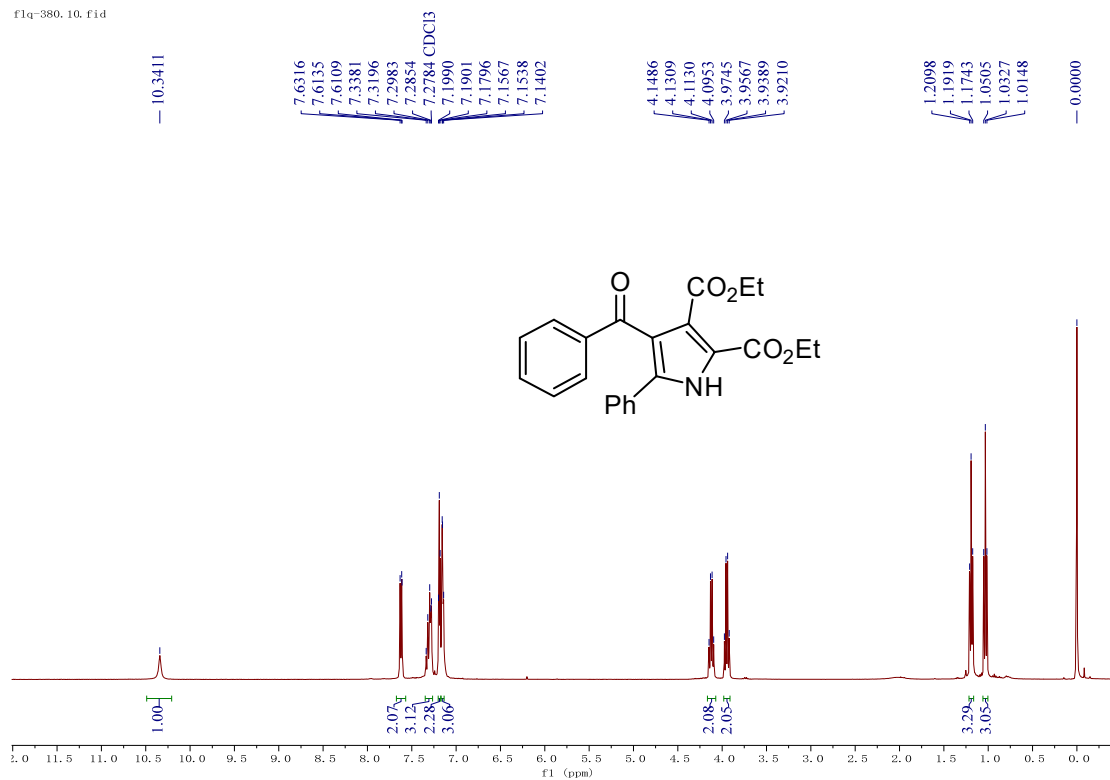

<sup>1</sup>H NMR spectrum of **5j** (400 MHz, CDCl<sub>3</sub>)

f1q-380.11.fid

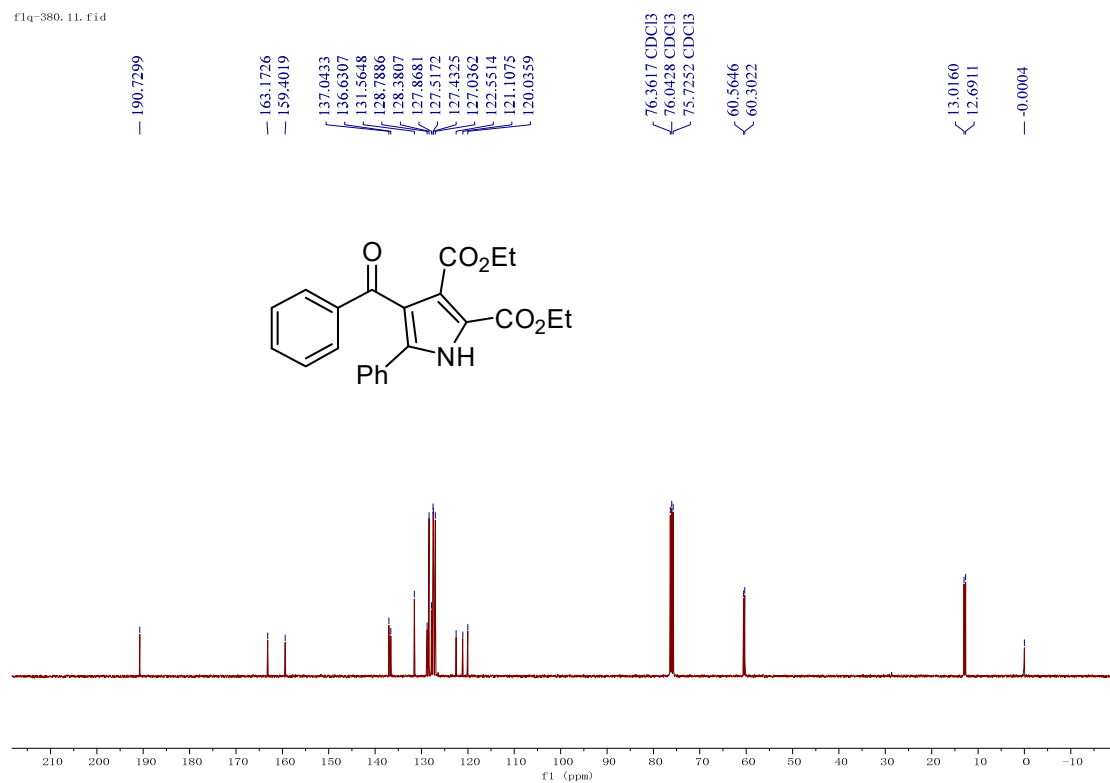

<sup>13</sup>C NMR spectrum of **5j** (100 MHz, CDCl<sub>3</sub>)

f1q-360.1.fid

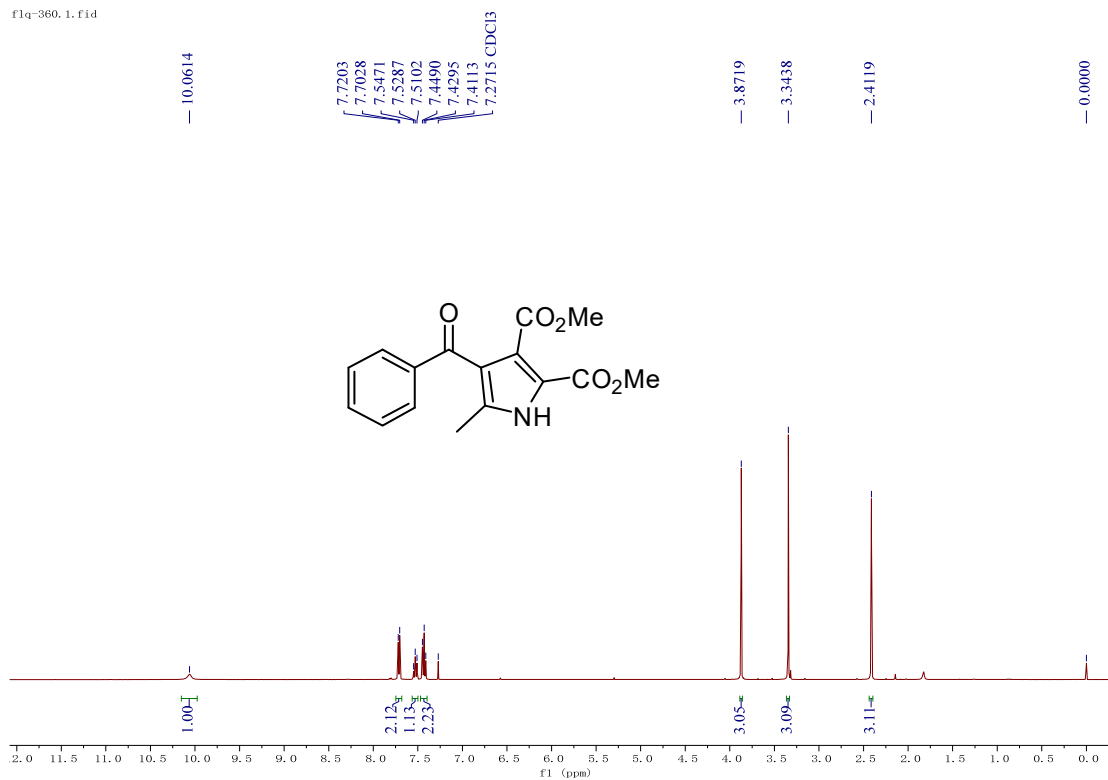

<sup>1</sup>H NMR spectrum of **5k** (400 MHz, CDCl<sub>3</sub>)

f1q-360-c.1.fid

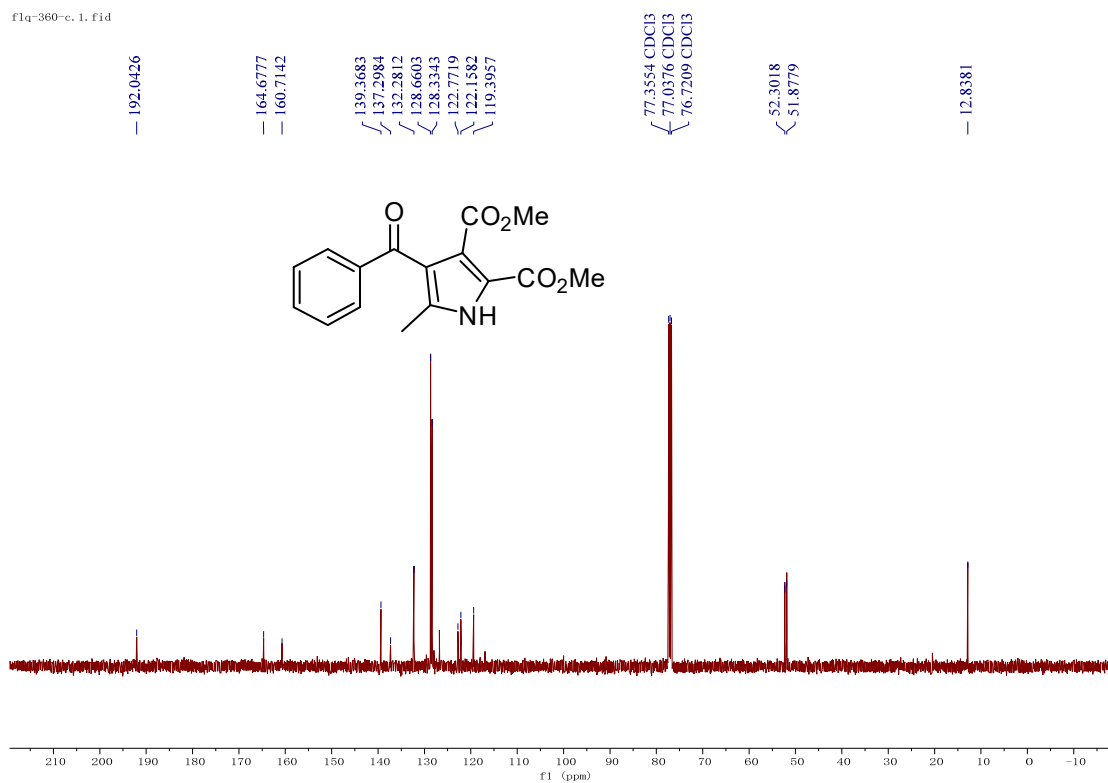

<sup>13</sup>C NMR spectrum of **5k** (100 MHz, CDCl<sub>3</sub>)

f1q-405.1.fid

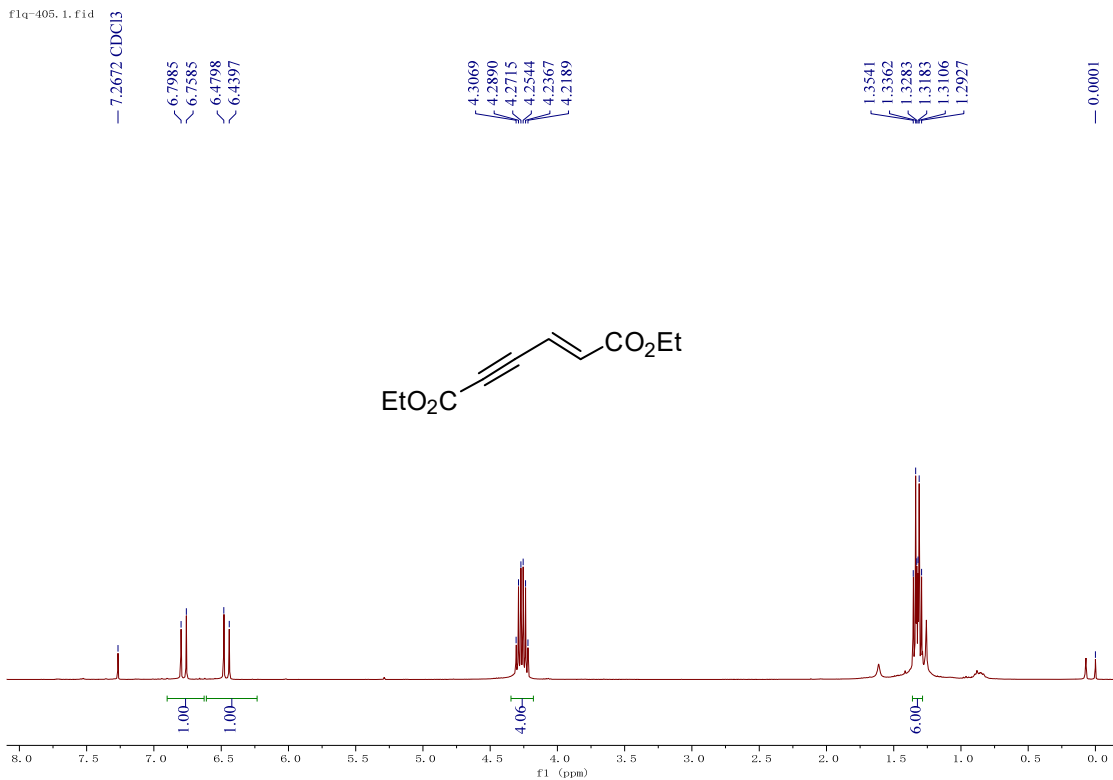

<sup>1</sup>H NMR spectra of **6** (400 MHz, CDCl<sub>3</sub>)

f1q-405.2.fid

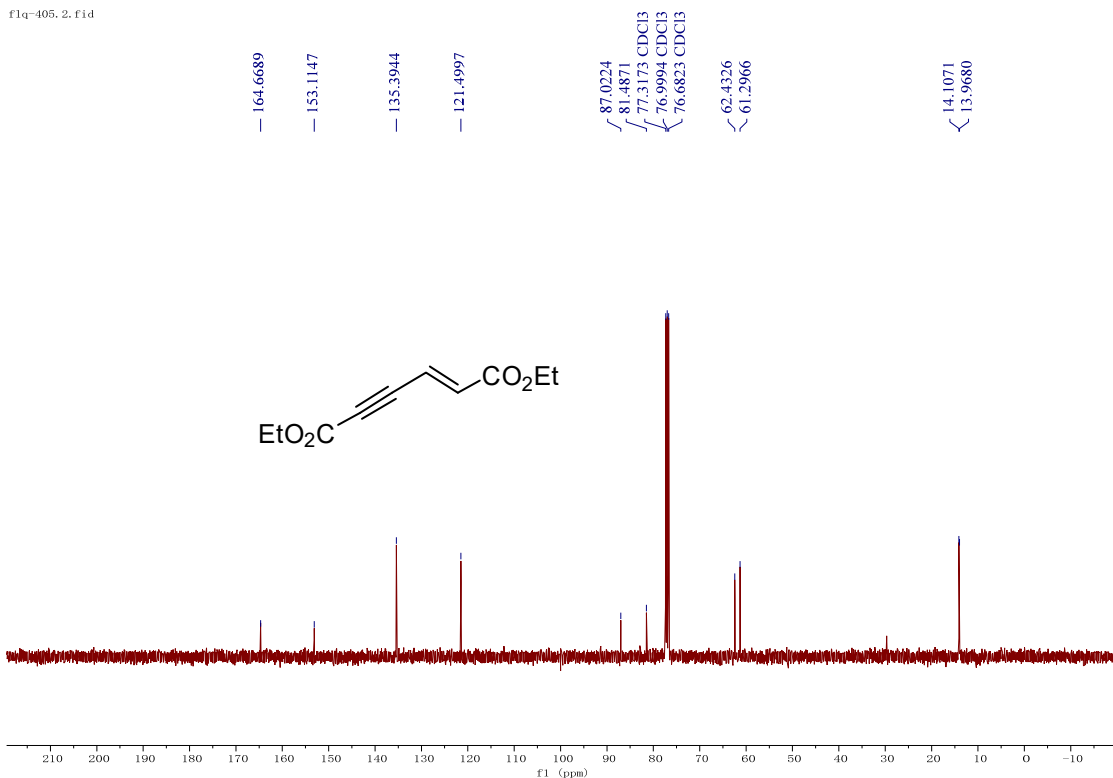

<sup>13</sup>C NMR spectra of **6** (100 MHz, CDCl<sub>3</sub>)
